# Supplementary material for: Complement-Opsonized HIV Modulates Pathways Involved in Infection of Cervical Mucosal Tissues: A Transcriptomic and Proteomic Study
Source: Frontiers journal article supplement (doi:10.3389/fimmu.2021.625649), 2021-05-20
Supplement: Data_Sheet_2.xls [file Data_Sheet_2.xls]

## Sheet: Sheet0
© 2000-2021 QIAGEN. All rights reserved.					F-HIV	F-HIV	C-HIV	C-HIV	CI-HIV	CI-HIV
Symbol	Entrez Gene Name	Gene Symbol - human (HUGO / HGNC / Entrez Gene)	Gene Symbol - human (HUGO / HGNC / Entrez Gene)	Gene Symbol - human (HUGO / HGNC / Entrez Gene)	Expr Log Ratio	Expr p-value	Expr Log Ratio	Expr p-value	Expr Log Ratio	Expr p-value	Location	Type(s)	Biomarker Application(s)	Drug(s)	Entrez Gene ID for Human	Entrez Gene ID for Mouse	Entrez Gene ID for Rat
A1BG	alpha-1-B glycoprotein	A1BG	A1BG	A1BG	-0.031	0.899	-0.144	0.73	-0.172	0.442	Extracellular Space	other	unspecified application		1	117586	140656
A2M	alpha-2-macroglobulin	A2M	A2M	A2M	-0.055	0.679	0.168	0.496	0.025	0.891	Extracellular Space	transporter			2	232345	24153|100911545
A2ML1	alpha-2-macroglobulin like 1	A2ML1	A2ML1	A2ML1	-0.323	0.798	-0.441	0.699	-0.976	0.566	Cytoplasm	other			144568
AARS1	alanyl-tRNA synthetase 1	AARS	AARS	AARS	-0.026	0.668	-0.001	0.996	0.026	0.722	Cytoplasm	enzyme			16	234734	292023
AARSD1	alanyl-tRNA synthetase domain containing 1	AARSD1	AARSD1	AARSD1	0.207		1.558		1.751		Nucleus	enzyme			80755	69684	619440
ABCD3	ATP binding cassette subfamily D member 3	ABCD3	ABCD3	ABCD3	-0.01	0.968	0.581	0.165	0.096	0.292	Cytoplasm	transporter			5825	19299	25270
ABCE1	ATP binding cassette subfamily E member 1	ABCE1	ABCE1	ABCE1	0.209	0.501	0.099	0.742	0.148	0.598	Cytoplasm	transporter			6059	24015	361390
ABCF1	ATP binding cassette subfamily F member 1	ABCF1	ABCF1	ABCF1	0.229	0.365	0.251	0.598	0.127	0.301	Cytoplasm	transporter			23	224742	85493
ABHD10	abhydrolase domain containing 10, depalmitoylase	ABHD10	ABHD10	ABHD10	-0.107	0.688	-0.153	0.775	-0.028	0.907	Cytoplasm	enzyme			55347	213012	303953
ABHD14B	abhydrolase domain containing 14B	ABHD14B	ABHD14B	ABHD14B	-0.095	0.311	-0.03	0.826	-0.096	0.475	Cytoplasm	enzyme			84836	76491	300983
ABI3BP	ABI family member 3 binding protein	ABI3BP	ABI3BP	ABI3BP	0.009	0.979	0.17	0.742	0.138	0.781	Extracellular Space	other			25890
ACAA1	acetyl-CoA acyltransferase 1	ACAA1	ACAA1	ACAA1	-0.254	0.459	-0.257	0.586	-0.367	0.378	Cytoplasm	enzyme	unspecified application	trimetazidine	30	113868	24157|501072
ACAA2	acetyl-CoA acyltransferase 2	ACAA2	ACAA2	ACAA2	-0.074	0.52	0.093	0.447	-0.009	0.959	Cytoplasm	enzyme	unspecified application		10449	52538	170465
ACAD9	acyl-CoA dehydrogenase family member 9	ACAD9	ACAD9	ACAD9	-0.295	0.328	-0.022	0.935	0.012	0.916	Cytoplasm	enzyme			28976	229211	294973
ACADM	acyl-CoA dehydrogenase medium chain	ACADM	ACADM	ACADM	-0.209	0.215	0.089	0.695	0.199	0.293	Cytoplasm	enzyme	unspecified application		34	11364	24158
ACADVL	acyl-CoA dehydrogenase very long chain	ACADVL	ACADVL	ACADVL	0.003	0.982	0.081	0.632	0.034	0.821	Cytoplasm	enzyme	unspecified application		37	11370	25363
ACAT1	acetyl-CoA acetyltransferase 1	ACAT1	ACAT1	ACAT1	0.053	0.746	0.062	0.443	-0.021	0.836	Cytoplasm	enzyme	unspecified application		38	110446	25014
ACAT2	acetyl-CoA acetyltransferase 2	ACAT2	ACAT2	ACAT2	0.111	0.521	-0.184	0.579	0.051	0.626	Cytoplasm	enzyme			39	110460|224530	308100|365096
ACBD3	acyl-CoA binding domain containing 3	ACBD3	ACBD3	ACBD3	-0.244	0.166	0.125	0.692	0.014	0.905	Cytoplasm	other			64746	170760	289312
ACIN1	apoptotic chromatin condensation inducer 1	ACIN1	ACIN1	ACIN1	0.082	0.277	0.255	0.106	0.24	0.106	Nucleus	enzyme			22985	56215	305884
ACLY	ATP citrate lyase	ACLY	ACLY	ACLY	0.053	0.793	-0.377	0.0531	-0.446	0.0708	Cytoplasm	enzyme	unspecified application	bempedoic acid,ezetimibe/8-hydroxy-2,2,14,14-tetramethyl-pentadecanedioic acid	47	104112	24159
ACO1	aconitase 1	ACO1	ACO1	ACO1	-0.02	0.732	0.026	0.858	0.008	0.91	Cytoplasm	enzyme			48	11428	50655
ACO2	aconitase 2	ACO2	ACO2	ACO2	-0.088	0.594	0.034	0.87	0.008	0.959	Cytoplasm	enzyme			50	11429	79250
ACOT1	acyl-CoA thioesterase 1	ACOT1	ACOT1	ACOT1	0.02	0.839	0.638	0.373	-0.048	0.853	Cytoplasm	enzyme			641371	171281	314304
ACOT9	acyl-CoA thioesterase 9	ACOT9	ACOT9	ACOT9	0.116	0.624	0.463	0.511	0.009	0.978	Cytoplasm	enzyme			23597	56360|64833	302640
ACOX1	acyl-CoA oxidase 1	ACOX1	ACOX1	ACOX1	0.03	0.934	0.149	0.0728	0.07	0.898	Cytoplasm	enzyme			51	11430	50681
ACP1	acid phosphatase 1	ACP1	ACP1	ACP1	-0.045	0.504	-0.098	0.412	-0.159	0.154	Cytoplasm	phosphatase			52	11431
ACSF2	acyl-CoA synthetase family member 2	ACSF2	ACSF2	ACSF2	0.153	0.65	0.274	0.597	0.121	0.493	Cytoplasm	enzyme			80221	264895	619561
ACSL3	acyl-CoA synthetase long chain family member 3	ACSL3	ACSL3	ACSL3	0.073	0.465	0.116	0.675	-0.052	0.801	Cytoplasm	enzyme			2181	74205	114024
ACTA2	actin alpha 2, smooth muscle	ACTA2	ACTA2	ACTA2	0.096	0.824	-0.016	0.986	0.28	0.729	Cytoplasm	other	efficacy		59	11475	81633
ACTBL2	actin beta like 2	ACTBL2	ACTBL2	ACTBL2	0.855	0.567	1.011	0.456	1.096	0.481	Nucleus	other			345651	238880	294732
ACTG1	actin gamma 1	ACTG1	ACTG1	ACTG1	-0.038	0.657	0.023	0.912	0.185	0.291	Cytoplasm	other	unspecified application		71	11465	287876
ACTL6A	actin like 6A	ACTL6A	ACTL6A	ACTL6A	0.036	0.848	0.157	0.383	0.034	0.867	Nucleus	other			86	56456	361925
ACTN1	actinin alpha 1	ACTN1	ACTN1	ACTN1	-0.016	0.917	0.135	0.643	0.145	0.6	Cytoplasm	transcription regulator			87	109711	81634
ACTN4	actinin alpha 4	ACTN4	ACTN4	ACTN4	-0.06	0.544	-0.054	0.551	0.03	0.738	Cytoplasm	transcription regulator			81	60595	63836
ACTR2	actin related protein 2	ACTR2	ACTR2	ACTR2	-0.108	0.435	0.02	0.891	-0.021	0.894	Plasma Membrane	other			10097	66713	289820
ACTR3	actin related protein 3	ACTR3	ACTR3	ACTR3	-0.143	0.441	0.009	0.827	-0.084	0.608	Plasma Membrane	other	diagnosis		10096	74117	81732
ACTR1A	actin related protein 1A	ACTR1A	ACTR1A	ACTR1A	-0.03	0.511	0.005	0.937	0.072	0.236	Cytoplasm	other			10121	54130	294010
ACTR1B	actin related protein 1B	ACTR1B	ACTR1B	ACTR1B	0.286	0.0421	0.373	0.0704	0.203	0.122	Cytoplasm	other			10120	226977	316333
ADAR	adenosine deaminase RNA specific	ADAR	ADAR	ADAR	-0.082	0.511	0.196	0.323	-0.09	0.71	Nucleus	enzyme			103	56417	81635
ADD1	adducin 1	ADD1	ADD1	ADD1	0.006	0.914	0.214	0.103	0.095	0.365	Cytoplasm	other			118	11518	24170
ADD3	adducin 3	ADD3	ADD3	ADD3	0.067	0.294	0.206	0.151	0.089	0.0494	Cytoplasm	other			120	27360	25230
ADGRE5	adhesion G protein-coupled receptor E5	CD97	CD97	CD97	-0.167	0.576	-0.124	0.346	0.157	0.216	Plasma Membrane	G-protein coupled receptor			976	26364	361383
ADH5	alcohol dehydrogenase 5 (class III), chi polypeptide	ADH5	ADH5	ADH5	0.012	0.887	0.079	0.628	0.098	0.635	Cytoplasm	enzyme			128	11532	100145871
ADH1B	alcohol dehydrogenase 1B (class I), beta polypeptide	ADH1B	ADH1B	ADH1B	-0.488	0.321	0.416	0.489	0.204	0.291	Cytoplasm	enzyme		fomepizole	125
ADIPOQ	adiponectin, C1Q and collagen domain containing	ADIPOQ	ADIPOQ	ADIPOQ	-0.081	0.772	-0.178	0.754	-0.075	0.88	Extracellular Space	other	diagnosis,efficacy,prognosis,response to therapy,safety,unspecified application		9370	11450	246253
ADIRF	adipogenesis regulatory factor	ADIRF	ADIRF	ADIRF	-0.161	0.273	-0.233	0.00226	-0.2	0.167	Nucleus	other			10974
ADK	adenosine kinase	ADK	ADK	ADK	-0.195	0.514	0.087	0.367	-0.241	0.107	Nucleus	kinase	unspecified application	adenosine kinase inhibitor,IFNA2B/ribavirin,interferon alfacon-1/ribavirin,nitazoxanide/peginterferon alfa-2a/ribavirin,PEG-interferon alfa-2a/ribavirin,pegintron/ribavirin,ribavirin	132	11534	25368
ADPRS	ADP-ribosylserine hydrolase	ADPRHL2	ADPRHL2	ADPRHL2	0.096	0.334	-0.348	0.651	-0.063	0.675	Cytoplasm	enzyme			54936	100206	362600
ADSS2	adenylosuccinate synthase 2	ADSS	ADSS	ADSS	0.027	0.884	0.654	0.308	0.473	0.258	Cytoplasm	enzyme		adenylosuccinate synthetase inhibitor,alanosine	159	11566	289276
AEBP1	AE binding protein 1	AEBP1	AEBP1	AEBP1	0.13	0.419	0.134	0.609	0.193	0.22	Nucleus	peptidase			165	11568	305494
AFG3L2	AFG3 like matrix AAA peptidase subunit 2	AFG3L2	AFG3L2	AFG3L2	0.448	0.0357	0.934	0.164	0.373	0.529	Cytoplasm	peptidase			10939	69597	307350
AFM	afamin	AFM	AFM	AFM	-0.106	0.732	0.527	0.255	0.103	0.726	Extracellular Space	transporter	unspecified application		173	280662	282708
AGL	amylo-alpha-1, 6-glucosidase, 4-alpha-glucanotransferase	AGL	AGL	AGL	-0.184	0.75	0.036	0.955	-0.135	0.695	Cytoplasm	enzyme			178	77559	362029
AGO1	argonaute RISC component 1	EIF2C1	EIF2C1	EIF2C1	0.173	0.374	0.885	0.151	0.288	0.0422	Cytoplasm	translation regulator			26523	236511	313594
AGR2	anterior gradient 2, protein disulphide isomerase family member	AGR2	AGR2	AGR2	-0.226	0.0674	-0.161	0.414	-0.431	0.271	Extracellular Space	other	diagnosis		10551	23795	298961
AGR3	anterior gradient 3, protein disulphide isomerase family member	AGR3	AGR3	AGR3	0.038	0.896	0.033	0.954	0.023	0.959	Extracellular Space	other	diagnosis		155465	403205	298959
AGRN	agrin	AGRN	AGRN	AGRN	-0.1	0.662	-0.027	0.934	0.028	0.918	Plasma Membrane	other			375790	11603	25592
AGT	angiotensinogen	AGT	AGT	AGT	-0.242	0.112	0.058	0.859	-0.096	0.605	Extracellular Space	growth factor	efficacy		183	11606	24179
AHCY	adenosylhomocysteinase	AHCY	AHCY	AHCY	-0.145	0.0963	-0.016	0.84	-0.086	0.338	Cytoplasm	enzyme	unspecified application	3-deazaaristeromycin,3-deazaneplanocin,6'-C-methylneplanocin A,9-(2',3'-dihydroxycyclopent-4'-enyl)adenine,cyanovirin-N,neplanocin A	191	269378	29443
AHCYL1	adenosylhomocysteinase like 1	AHCYL1	AHCYL1	AHCYL1	-0.199	0.412	0.006	0.971	-0.105	0.513	Cytoplasm	enzyme	unspecified application		10768	229709	362013
AHNAK2	AHNAK nucleoprotein 2	AHNAK2	AHNAK2	AHNAK2	0.023	0.835	0.078	0.515	0.007	0.937	Cytoplasm	other			113146	100041194	314478
AHNAK	AHNAK nucleoprotein	AHNAK	AHNAK	AHNAK	-0.035	0.486	0.129	0.332	0.079	0.188	Nucleus	other			79026	66395	191572
AHSA1	activator of HSP90 ATPase activity 1	AHSA1	AHSA1	AHSA1	0.354	0.213	0.584	0.161	0.233	0.378	Cytoplasm	other			10598	217737	681996
AHSG	alpha 2-HS glycoprotein	AHSG	AHSG	AHSG	0.057	0.836	-0.045	0.929	-0.189	0.36	Extracellular Space	other	unspecified application		197	11625	25373
AIFM1	apoptosis inducing factor mitochondria associated 1	AIFM1	AIFM1	AIFM1	-0.04	0.608	-0.088	0.624	-0.103	0.504	Cytoplasm	enzyme			9131	26926	83533
AIMP1	aminoacyl tRNA synthetase complex interacting multifunctional protein 1	AIMP1	AIMP1	AIMP1	0.071	0.742	0.036	0.888	0.011	0.963	Extracellular Space	cytokine	diagnosis		9255	13722	114632
AIP	aryl hydrocarbon receptor interacting protein	AIP	AIP	AIP	0.049	0.596	0.113	0.389	0.043	0.687	Nucleus	transcription regulator			9049	11632	282827
AK1	adenylate kinase 1	AK1	AK1	AK1	0.022	0.859	0.223	0.161	-0.011	0.933	Cytoplasm	kinase	unspecified application		203	11636	24183
AK2	adenylate kinase 2	AK2	AK2	AK2	0.014	0.908	-0.095	0.483	0.07	0.483	Cytoplasm	kinase			204	11637	24184
AK3	adenylate kinase 3	AK3	AK3	AK3	-0.015	0.936	0.16	0.522	-0.056	0.72	Cytoplasm	kinase			50808	56248	26956
AKAP12	A-kinase anchoring protein 12	AKAP12	AKAP12	AKAP12	0.305	0.0882	0.408	0.119	0.399	0.189	Cytoplasm	transporter	unspecified application		9590	83397	83425
AKR1A1	aldo-keto reductase family 1 member A1	AKR1A1	AKR1A1	AKR1A1	-0.107	0.115	0.053	0.486	-0.136	0.162	Cytoplasm	enzyme		aldose reductase inhibitor	10327	58810	78959
AKR1B1	aldo-keto reductase family 1 member B	AKR1B1	AKR1B1	AKR1B1	-0.048	0.563	0.119	0.507	-0.002	0.988	Cytoplasm	enzyme		sorbinil	231	11677	24192
AKR1B10	aldo-keto reductase family 1 member B10	AKR1B10	AKR1B10	AKR1B10	0.521	0.432	0.456	0.182	0.324	0.486	Cytoplasm	enzyme	unspecified application		57016	14187	286921
AKR7A2	aldo-keto reductase family 7 member A2	AKR7A2	AKR7A2	AKR7A2	0.081	0.458	0	0.998	0.038	0.783	Cytoplasm	enzyme	diagnosis		8574	110198	171445
ALAD	aminolevulinate dehydratase	ALAD	ALAD	ALAD	0.029	0.867	0.128	0.674	0.041	0.814	Cytoplasm	enzyme		delta-aminolevulinic acid	210	17025	25374
ALB	albumin	ALB	ALB	ALB	0.12	0.743	0.082	0.879	-0.209	0.581	Extracellular Space	transporter	diagnosis,efficacy,prognosis,safety,unspecified application	aldoxorubicin,gadofosveset trisodium,GSK3128349,NM21-1480	213	11657	24186
ALCAM	activated leukocyte cell adhesion molecule	ALCAM	ALCAM	ALCAM	-0.073	0.602	0.117	0.7	-0.314	0.202	Plasma Membrane	other	prognosis	praluzatamab ravtansine	214	11658	79559
ALDH2	aldehyde dehydrogenase 2 family member	ALDH2	ALDH2	ALDH2	-0.121	0.026	-0.089	0.533	-0.089	0.468	Cytoplasm	enzyme	unspecified application	ANS-6637,chlorpropamide,disulfiram,disulfiram/gemcitabine	217	11669	29539
ALDH16A1	aldehyde dehydrogenase 16 family member A1	ALDH16A1	ALDH16A1	ALDH16A1	-0.033	0.707	0.406	0.349	0.318	0.295	Cytoplasm	enzyme			126133	69748	361571
ALDH18A1	aldehyde dehydrogenase 18 family member A1	ALDH18A1	ALDH18A1	ALDH18A1	0.032	0.698	0.055	0.368	0.112	0.501	Cytoplasm	kinase			5832	56454	361755
ALDH1A1	aldehyde dehydrogenase 1 family member A1	ALDH1A1	ALDH1A1	ALDH1A1	-0.055	0.709	-0.061	0.548	-0.047	0.687	Cytoplasm	enzyme	diagnosis,disease progression	chlorpropamide,disulfiram	216	11668	24188
ALDH1A2	aldehyde dehydrogenase 1 family member A2	ALDH1A2	ALDH1A2	ALDH1A2	0.138	0.272	0.019	0.887	0.094	0.519	Cytoplasm	enzyme			8854	19378	116676
ALDH1A3	aldehyde dehydrogenase 1 family member A3	ALDH1A3	ALDH1A3	ALDH1A3	0.001	0.996	-0.298	0.175	-0.019	0.929	Cytoplasm	enzyme			220	56847	266603
ALDH1B1	aldehyde dehydrogenase 1 family member B1	ALDH1B1	ALDH1B1	ALDH1B1	0.15	0.66	0.555	0.364	0.64	0.343	Cytoplasm	enzyme			219	72535	298079
ALDH3A1	aldehyde dehydrogenase 3 family member A1	ALDH3A1	ALDH3A1	ALDH3A1	0.084		-0.336		-0.661		Cytoplasm	enzyme	diagnosis,unspecified application		218	11670	25375
ALDH3A2	aldehyde dehydrogenase 3 family member A2	ALDH3A2	ALDH3A2	ALDH3A2	-0.201	0.118	-0.227	0.162	-0.28	0.149	Cytoplasm	enzyme			224	11671	65183
ALDH4A1	aldehyde dehydrogenase 4 family member A1	ALDH4A1	ALDH4A1	ALDH4A1	0.233	0.316	-0.113	0.702	-0.054	0.86	Cytoplasm	enzyme			8659	212647	641316
ALDH6A1	aldehyde dehydrogenase 6 family member A1	ALDH6A1	ALDH6A1	ALDH6A1	-0.104	0.584	0.013	0.947	-0.015	0.936	Cytoplasm	enzyme	unspecified application		4329	104776	81708
ALDH7A1	aldehyde dehydrogenase 7 family member A1	ALDH7A1	ALDH7A1	ALDH7A1	-0.152	0.261	-0.084	0.565	-0.11	0.561	Cytoplasm	enzyme			501	110695	291450
ALDH9A1	aldehyde dehydrogenase 9 family member A1	ALDH9A1	ALDH9A1	ALDH9A1	0.066	0.458	0.086	0.572	0.011	0.948	Cytoplasm	enzyme			223	56752	64040
ALDOA	aldolase, fructose-bisphosphate A	ALDOA	ALDOA	ALDOA	-0.072	0.427	0.001	0.991	-0.03	0.685	Cytoplasm	enzyme	unspecified application		226	11674	24189
ALDOC	aldolase, fructose-bisphosphate C	ALDOC	ALDOC	ALDOC	-0.005	0.961	0.136	0.216	0.085	0.392	Cytoplasm	enzyme	unspecified application		230	11676	24191
ALOX12	arachidonate 12-lipoxygenase, 12S type	ALOX12	ALOX12	ALOX12	0.655		0.375		0.258		Cytoplasm	enzyme		balsalazide,mesalamine,nordihydroguaiaretic acid,sulfasalazine	239	11684	287454
ALYREF	Aly/REF export factor	ALYREF	ALYREF	ALYREF	0.281	0.0126	0.414	0.292	0.427	0.0325	Nucleus	transcription regulator			10189		690585
AMBP	alpha-1-microglobulin/bikunin precursor	AMBP	AMBP	AMBP	0.225	0.235	0.532	0.253	0.22	0.543	Extracellular Space	transporter	safety,unspecified application		259	11699	25377
AMPD2	adenosine monophosphate deaminase 2	AMPD2	AMPD2	AMPD2	0.001	0.992	-0.002	0.981	0.17	0.382	Cytoplasm	enzyme			271	109674	362015
AMY1C (includes others)	amylase alpha 1C	AMY1A	AMY1A	AMY1A	-0.987	0.00942	-0.67	0.202	-1.258	0.188	Extracellular Space	enzyme	unspecified application		276|277|278
ANGPTL2	angiopoietin like 2	ANGPTL2	ANGPTL2	ANGPTL2	0.266	0.232	-0.043	0.683	0.327	0.317	Extracellular Space	other			23452	26360	171100
ANK2	ankyrin 2	ANK2	ANK2	ANK2	0.429	0.193	0.25	0.237	0.371	0.101	Plasma Membrane	other
ANKFY1	ankyrin repeat and FYVE domain containing 1	ANKFY1	ANKFY1	ANKFY1	0.362	0.0211	0.205	0.0252	0.148	0.426	Cytoplasm	transcription regulator
ANP32A	acidic nuclear phosphoprotein 32 family member A	ANP32A	ANP32A	ANP32A	-0.102	0.472	0.266	0.575	0.33	0.402	Other	other
ANP32B	acidic nuclear phosphoprotein 32 family member B	ANP32B	ANP32B	ANP32B	-0.178	0.23	-0.258	0.461	-0.449	0.339	Nucleus	other
ANP32E	acidic nuclear phosphoprotein 32 family member E	ANP32E	ANP32E	ANP32E	-0.091	0.516	-0.171	0.333	-0.119	0.213	Nucleus	other
ANPEP	alanyl aminopeptidase, membrane	ANPEP	ANPEP	ANPEP	-0.151	0.593	0.292	0.221	0.111	0.67	Plasma Membrane	peptidase	safety,unspecified application	CNGRC peptide-TNF alpha conjugate
ANXA1	annexin A1	ANXA1	ANXA1	ANXA1	-0.02	0.97	-0.075	0.868	-0.218	0.714	Plasma Membrane	enzyme	diagnosis,prognosis,unspecified application	acyclovir/hydrocortisone,cytarabine/hydrocortisone/methotrexate,dasatinib/hydrocortisone,hydrocortisone,hydrocortisone/imatinib,hydrocortisone/mitoxantrone,hydrocortisone/prednisone
ANXA2	annexin A2	ANXA2	ANXA2	ANXA2	0.013	0.899	-0.169	0.444	-0.061	0.811	Plasma Membrane	other	diagnosis,unspecified application
ANXA3	annexin A3	ANXA3	ANXA3	ANXA3	-0.25	0.3	0.134	0.606	-0.298	0.0653	Cytoplasm	enzyme	diagnosis,unspecified application
ANXA4	annexin A4	ANXA4	ANXA4	ANXA4	-0.056	0.228	0.089	0.335	0.014	0.875	Plasma Membrane	other
ANXA5	annexin A5	ANXA5	ANXA5	ANXA5	-0.165	0.218	-0.012	0.848	-0.049	0.363	Plasma Membrane	transporter	diagnosis,efficacy
ANXA6	annexin A6	ANXA6	ANXA6	ANXA6	-0.071	0.562	0.104	0.502	0.098	0.53	Plasma Membrane	ion channel
ANXA7	annexin A7	ANXA7	ANXA7	ANXA7	-0.101	0.457	0.189	0.259	0.047	0.721	Plasma Membrane	ion channel
ANXA11	annexin A11	ANXA11	ANXA11	ANXA11	-0.058	0.63	0.057	0.594	0.001	0.995	Nucleus	other
ANXA8/ANXA8L1	annexin A8 like 1	ANXA8	ANXA8	ANXA8	0.435	0.0897	0.194	0.00706	0.125	0.627	Plasma Membrane	other
AOC3	amine oxidase copper containing 3	AOC3	AOC3	AOC3	-0.712	0.197	-0.113	0.783	-0.027	0.844	Plasma Membrane	enzyme		ASP8232,hydralazine,hydralazine/hydrochlorothiazide,hydralazine/hydrochlorothiazide/reserpine,hydralazine/isosorbide dinitrate
AP1B1	adaptor related protein complex 1 subunit beta 1	AP1B1	AP1B1	AP1B1	-0.179	0.526	-0.057	0.659	0.122	0.749	Cytoplasm	other
AP1G1	adaptor related protein complex 1 subunit gamma 1	AP1G1	AP1G1	AP1G1	-0.199	0.0374	0.054	0.752	-0.321	0.108	Cytoplasm	other
AP2A1	adaptor related protein complex 2 subunit alpha 1	AP2A1	AP2A1	AP2A1	-0.115	0.352	-0.068	0.429	0.037	0.784	Cytoplasm	transporter
AP2A2	adaptor related protein complex 2 subunit alpha 2	AP2A2	AP2A2	AP2A2	0.122	0.374	0.142	0.454	0.139	0.47	Cytoplasm	transporter
AP2B1	adaptor related protein complex 2 subunit beta 1	AP2B1	AP2B1	AP2B1	-0.142	0.414	0.004	0.981	0.062	0.738	Plasma Membrane	transporter
AP2M1	adaptor related protein complex 2 subunit mu 1	AP2M1	AP2M1	AP2M1	-0.082	0.432	0.185	0.418	0.07	0.384	Cytoplasm	other
AP2S1	adaptor related protein complex 2 subunit sigma 1	AP2S1	AP2S1	AP2S1	-0.127	0.744	-0.1	0.833	-0.112	0.518	Cytoplasm	transporter
AP3D1	adaptor related protein complex 3 subunit delta 1	AP3D1	AP3D1	AP3D1	-0.087	0.769	0.098	0.831	-0.169	0.2	Cytoplasm	other
APCS	amyloid P component, serum	APCS	APCS	APCS	0.022	0.926	0.097	0.792	0.274	0.456	Extracellular Space	other	unspecified application	dezamizumab
APEH	acylaminoacyl-peptide hydrolase	APEH	APEH	APEH	-0.144	0.563	0.08	0.509	-0.207	0.377	Cytoplasm	peptidase
APEX1	apurinic/apyrimidinic endodeoxyribonuclease 1	APEX1	APEX1	APEX1	-0.044	0.723	0.064	0.794	0.041	0.878	Nucleus	enzyme		E 3330,lucanthone
API5	apoptosis inhibitor 5	API5	API5	API5	0.044	0.449	0.223	0.263	0.063	0.362	Cytoplasm	other
APMAP	adipocyte plasma membrane associated protein	APMAP	APMAP	APMAP	-0.103	0.427	0.03	0.838	0.035	0.821	Plasma Membrane	enzyme
APOA1	apolipoprotein A1	APOA1	APOA1	APOA1	0.064	0.788	0.158	0.622	-0.065	0.777	Extracellular Space	transporter	diagnosis,efficacy,unspecified application	ISIS 681257
APOA2	apolipoprotein A2	APOA2	APOA2	APOA2	-0.018	0.954	0.221	0.534	-0.11	0.709	Extracellular Space	transporter	efficacy
APOA4	apolipoprotein A4	APOA4	APOA4	APOA4	0.073	0.748	0.24	0.497	0.107	0.675	Extracellular Space	transporter	unspecified application
APOB	apolipoprotein B	APOB	APOB	APOB	-0.115	0.315	0.282	0.255	0.034	0.884	Extracellular Space	transporter	diagnosis,efficacy	mipomersen
APOC1	apolipoprotein C1	APOC1	APOC1	APOC1	-0.044	0.866	0.105	0.728	0.12	0.646	Extracellular Space	transporter	prognosis,unspecified application
APOC3	apolipoprotein C3	APOC3	APOC3	APOC3	0.355	0.557	1.054	0.188	0.06	0.931	Extracellular Space	transporter	diagnosis,efficacy	volanesorsen
APOD	apolipoprotein D	APOD	APOD	APOD	-0.067	0.71	-0.005	0.98	0.056	0.746	Extracellular Space	transporter	safety
APOE	apolipoprotein E	APOE	APOE	APOE	0.099	0.467	0.273	0.00663	-0.044	0.786	Extracellular Space	transporter	diagnosis,efficacy,prognosis,unspecified application
APOH	apolipoprotein H	APOH	APOH	APOH	-0.023	0.847	-0.088	0.739	0.031	0.83	Extracellular Space	transporter	unspecified application
APOL2	apolipoprotein L2	APOL2	APOL2	APOL2	-0.179	0.58	-0.146	0.469	-0.095	0.743	Cytoplasm	other
APPL1	adaptor protein, phosphotyrosine interacting with PH domain and leucine zipper 1	APPL1	APPL1	APPL1	0.289	0.388	0.025	0.931	0.242	0.187	Cytoplasm	other
APRT	adenine phosphoribosyltransferase	APRT	APRT	APRT	0.022	0.782	-0.042	0.787	-0.07	0.667	Cytoplasm	enzyme
ARCN1	archain 1	ARCN1	ARCN1	ARCN1	-0.021	0.8	-0.088	0.598	-0.144	0.608	Cytoplasm	other
ARF1	ADP ribosylation factor 1	ARF1	ARF1	ARF1	-0.136	0.448	0.022	0.942	-0.185	0.408	Cytoplasm	enzyme
ARF4	ADP ribosylation factor 4	ARF4	ARF4	ARF4	-0.291	0.256	-0.151	0.581	-0.174	0.448	Cytoplasm	enzyme
ARF5	ADP ribosylation factor 5	ARF5	ARF5	ARF5	0	0.999	0.206	0.367	0.056	0.688	Cytoplasm	enzyme
ARF6	ADP ribosylation factor 6	ARF6	ARF6	ARF6	-0.276	0.247	-0.231	0.474	-0.331	0.403	Plasma Membrane	transporter
ARHGAP1	Rho GTPase activating protein 1	ARHGAP1	ARHGAP1	ARHGAP1	-0.052	0.65	-0.102	0.662	-0.034	0.843	Cytoplasm	other
ARHGAP17	Rho GTPase activating protein 17	ARHGAP17	ARHGAP17	ARHGAP17	-0.124	0.142	0.107	0.63	0.245	0.281	Cytoplasm	other
ARHGDIA	Rho GDP dissociation inhibitor alpha	ARHGDIA	ARHGDIA	ARHGDIA	-0.036	0.516	0.024	0.918	-0.093	0.506	Cytoplasm	other	unspecified application
ARHGDIB	Rho GDP dissociation inhibitor beta	ARHGDIB	ARHGDIB	ARHGDIB	-0.069	0.435	0.216	0.0595	-0.131	0.685	Cytoplasm	enzyme	diagnosis
ARL3	ADP ribosylation factor like GTPase 3	ARL3	ARL3	ARL3	-0.094	0.618	-0.107	0.338	-0.037	0.753	Cytoplasm	enzyme
ARL6IP4	ADP ribosylation factor like GTPase 6 interacting protein 4	ARL6IP4	ARL6IP4	ARL6IP4	0.105		0.714	0.486	0.088	0.925	Nucleus	other
ARL6IP5	ADP ribosylation factor like GTPase 6 interacting protein 5	ARL6IP5	ARL6IP5	ARL6IP5	-0.231	0.492	0.358	0.37	0.195	0.229	Cytoplasm	other
ARL8B	ADP ribosylation factor like GTPase 8B	ARL8B	ARL8B	ARL8B	-0.182	0.416	0.082	0.892	0.055	0.743	Plasma Membrane	enzyme
ARPC2	actin related protein 2/3 complex subunit 2	ARPC2	ARPC2	ARPC2	-0.165	0.33	-0.163	0.262	-0.126	0.476	Cytoplasm	other
ARPC4	actin related protein 2/3 complex subunit 4	ARPC4	ARPC4	ARPC4	-0.144	0.436	-0.056	0.75	-0.023	0.916	Cytoplasm	other
ARPC5	actin related protein 2/3 complex subunit 5	ARPC5	ARPC5	ARPC5	0.037	0.756	0.095	0.0843	0.035	0.537	Cytoplasm	other	unspecified application
ARPC1A	actin related protein 2/3 complex subunit 1A	ARPC1A	ARPC1A	ARPC1A	-0.112	0.153	-0.273	0.073	-0.25	0.0523	Extracellular Space	other
ARPC1B	actin related protein 2/3 complex subunit 1B	ARPC1B	ARPC1B	ARPC1B	-0.162	0.507	-0.144	0.161	-0.172	0.637	Cytoplasm	other
ARPC5L	actin related protein 2/3 complex subunit 5 like	ARPC5L	ARPC5L	ARPC5L	0.033	0.826	-0.102	0.523	-0.116	0.564	Cytoplasm	other
ARPIN/ARPIN-AP3S2	ARPIN-AP3S2 readthrough	C15orf38	C15orf38	C15orf38	0.092	0.483	0.037	0.923	-0.051	0.765	Plasma Membrane	other
ASAH1	N-acylsphingosine amidohydrolase 1	ASAH1	ASAH1	ASAH1	-0.048	0.73	0.097	0.58	-0.146	0.71	Cytoplasm	enzyme	unspecified application
ASPH	aspartate beta-hydroxylase	ASPH	ASPH	ASPH	0.152	0.541	0.331	0.0443	0.04	0.801	Cytoplasm	enzyme
ASPN	asporin	ASPN	ASPN	ASPN	0.335	0.237	0.22	0.564	0.293	0.347	Extracellular Space	other
ASPSCR1	ASPSCR1 tether for SLC2A4, UBX domain containing	ASPSCR1	ASPSCR1	ASPSCR1	-0.305	0.378	0.566	0.0261	0.036	0.698	Cytoplasm	other
ASRGL1	asparaginase and isoaspartyl peptidase 1	ASRGL1	ASRGL1	ASRGL1	0.015	0.836	0.1	0.864	-0.174	0.664	Cytoplasm	enzyme
ASS1	argininosuccinate synthase 1	ASS1	ASS1	ASS1	-0.272	0.229	-0.156	0.633	-0.201	0.461	Cytoplasm	enzyme
ATIC	5-aminoimidazole-4-carboxamide ribonucleotide formyltransferase/IMP cyclohydrolase	ATIC	ATIC	ATIC	-0.038	0.671	0.081	0.272	0.005	0.966	Cytoplasm	enzyme		gemcitabine/pemetrexed,pembrolizumab/pemetrexed,pemetrexed
ATL3	atlastin GTPase 3	ATL3	ATL3	ATL3	-0.079	0.598	0.142	0.427	-0.117	0.615	Cytoplasm	other
ATP13A1	ATPase 13A1	ATP13A1	ATP13A1	ATP13A1	-0.112	0.716	0.307	0.406	0.128	0.422	Extracellular Space	transporter
ATP1A1	ATPase Na+/K+ transporting subunit alpha 1	ATP1A1	ATP1A1	ATP1A1	-0.163	0.514	0.06	0.84	0.042	0.768	Plasma Membrane	transporter		acetyldigitoxin derivative,bretylium,ciclopirox olamine,digitoxin,digoxin,ethacrynic acid,ouabain,perphenazine,reserpine/trichloromethiazide,trichloromethiazide
ATP1B1	ATPase Na+/K+ transporting subunit beta 1	ATP1B1	ATP1B1	ATP1B1	-0.169	0.325	0.121	0.626	0.122	0.409	Plasma Membrane	transporter
ATP1B3	ATPase Na+/K+ transporting subunit beta 3	ATP1B3	ATP1B3	ATP1B3	-0.521		-0.952		-0.253		Plasma Membrane	transporter
ATP2A2	ATPase sarcoplasmic/endoplasmic reticulum Ca2+ transporting 2	ATP2A2	ATP2A2	ATP2A2	-0.117	0.622	-0.004	0.987	-0.123	0.412	Cytoplasm	transporter
ATP2B1	ATPase plasma membrane Ca2+ transporting 1	ATP2B1	ATP2B1	ATP2B1	0.196		0.577		-0.607		Plasma Membrane	transporter
ATP2B4	ATPase plasma membrane Ca2+ transporting 4	ATP2B4	ATP2B4	ATP2B4	-0.1	0.654	0.314	0.253	0.047	0.756	Plasma Membrane	transporter
ATP5F1A	ATP synthase F1 subunit alpha	ATP5A1	ATP5A1	ATP5A1	-0.132	0.18	-0.118	0.507	-0.138	0.294	Cytoplasm	transporter
ATP5F1B	ATP synthase F1 subunit beta	ATP5B	ATP5B	ATP5B	-0.164	0.209	-0.154	0.452	-0.104	0.337	Cytoplasm	transporter
ATP5F1C	ATP synthase F1 subunit gamma	ATP5C1	ATP5C1	ATP5C1	-0.15	0.37	-0.169	0.32	-0.023	0.87	Cytoplasm	transporter
ATP5F1D	ATP synthase F1 subunit delta	ATP5D	ATP5D	ATP5D	-0.073	0.214	0.005	0.979	0.045	0.829	Cytoplasm	transporter
ATP5ME	ATP synthase membrane subunit e	ATP5I	ATP5I	ATP5I	-0.064	0.4	-0.024	0.801	0.014	0.948	Cytoplasm	transporter
ATP5MG	ATP synthase membrane subunit g	ATP5L	ATP5L	ATP5L	-0.067	0.687	0.078	0.794	-0.011	0.961	Cytoplasm	enzyme
ATP5PB	ATP synthase peripheral stalk-membrane subunit b	ATP5F1	ATP5F1	ATP5F1	-0.185	0.382	-0.143	0.598	0.019	0.88	Cytoplasm	transporter
ATP5PD	ATP synthase peripheral stalk subunit d	ATP5H	ATP5H	ATP5H	-0.118	0.106	-0.087	0.481	-0.109	0.478	Cytoplasm	enzyme
ATP5PF	ATP synthase peripheral stalk subunit F6	ATP5J	ATP5J	ATP5J	-0.018	0.916	-0.215	0.361	0.027	0.88	Cytoplasm	transporter
ATP5PO	ATP synthase peripheral stalk subunit OSCP	ATP5O	ATP5O	ATP5O	-0.186	0.0546	-0.212	0.0639	-0.037	0.624	Cytoplasm	transporter
ATP6V0D1	ATPase H+ transporting V0 subunit d1	ATP6V0D1	ATP6V0D1	ATP6V0D1	0.072	0.706	0.229	0.0192	-0.065	0.761	Cytoplasm	transporter
ATP6V1A	ATPase H+ transporting V1 subunit A	ATP6V1A	ATP6V1A	ATP6V1A	0.024	0.661	0.235	0.0845	0.157	0.0832	Plasma Membrane	transporter		bafilomycin A1,bafilomycin b1
ATP6V1B2	ATPase H+ transporting V1 subunit B2	ATP6V1B2	ATP6V1B2	ATP6V1B2	-0.116	0.308	-0.074	0.588	-0.049	0.465	Cytoplasm	transporter	unspecified application	gallium nitrate
ATP6V1E1	ATPase H+ transporting V1 subunit E1	ATP6V1E1	ATP6V1E1	ATP6V1E1	-0.083	0.696	-0.083	0.669	-0.187	0.495	Cytoplasm	transporter
AZGP1	alpha-2-glycoprotein 1, zinc-binding	AZGP1	AZGP1	AZGP1	0.059	0.848	0.089	0.855	-0.166	0.562	Extracellular Space	transporter	unspecified application
B2M	beta-2-microglobulin	B2M	B2M	B2M	-0.178	0.455	0.093	0.68	0.054	0.856	Plasma Membrane	transmembrane receptor	disease progression,efficacy,safety,unspecified application	4'-iodo-4'-deoxydoxorubicin
BAG2	BAG cochaperone 2	BAG2	BAG2	BAG2	0.221	0.291	0.283	0.163	0.197	0.396	Cytoplasm	other
BAG3	BAG cochaperone 3	BAG3	BAG3	BAG3	0.242	0.459	0.375	0.284	0.341	0.388	Cytoplasm	other
BAG5	BAG cochaperone 5	BAG5	BAG5	BAG5	0.26	0.53	0.463	0.364	0.036	0.72	Cytoplasm	other
BANF1	BAF nuclear assembly factor 1	BANF1	BANF1	BANF1	0.192	0.553	0.116	0.602	0.042	0.772	Nucleus	other
BASP1	brain abundant membrane attached signal protein 1	BASP1	BASP1	BASP1	-0.045	0.796	0.564	0.0722	0.193	0.459	Nucleus	transcription regulator
BAZ1B	bromodomain adjacent to zinc finger domain 1B	BAZ1B	BAZ1B	BAZ1B	-0.358	0.351	-0.16	0.869	0.079	0.879	Nucleus	transcription regulator
BCAM	basal cell adhesion molecule (Lutheran blood group)	BCAM	BCAM	BCAM	-0.08	0.791	0.265	0.278	0.242	0.138	Plasma Membrane	transmembrane receptor	diagnosis
BCAP29	B cell receptor associated protein 29	BCAP29	BCAP29	BCAP29	0.361	0.106	1.127	0.252	0.165	0.594	Cytoplasm	transporter
BCAP31	B cell receptor associated protein 31	BCAP31	BCAP31	BCAP31	-0.092	0.717	0.241	0.452	0.064	0.628	Cytoplasm	transporter
BCL2L13	BCL2 like 13	BCL2L13	BCL2L13	BCL2L13	0.082	0.157	0.29	0.164	0.092	0.53	Cytoplasm	other
BCLAF1	BCL2 associated transcription factor 1	BCLAF1	BCLAF1	BCLAF1	0.367	0.366	0.671	0.173	0.015	0.899	Nucleus	transcription regulator
BDH2	3-hydroxybutyrate dehydrogenase 2	BDH2	BDH2	BDH2	-0.136	0.252	-0.019	0.907	-0.12	0.499	Cytoplasm	enzyme
BGN	biglycan	BGN	BGN	BGN	0.222	0.28	-0.004	0.991	0.18	0.504	Extracellular Space	other
BIN1	bridging integrator 1	BIN1	BIN1	BIN1	-0.033	0.695	0.161	0.22	-0.035	0.763	Nucleus	other
BLVRA	biliverdin reductase A	BLVRA	BLVRA	BLVRA	-0.164	0.356	0.146	0.267	-0.082	0.532	Cytoplasm	enzyme
BLVRB	biliverdin reductase B	BLVRB	BLVRB	BLVRB	0.015	0.786	0	0.999	0.023	0.584	Cytoplasm	enzyme
BOLA2/BOLA2B	bolA family member 2	BOLA2	BOLA2	BOLA2	0.063	0.485	0.086	0.343	0.321	0.272	Cytoplasm	enzyme
BPIFB1	BPI fold containing family B member 1	BPIFB1	BPIFB1	BPIFB1	-0.864	0.206	-0.532	0.548	-1.302	0.163	Extracellular Space	other
BPNT2	3'(2'), 5'-bisphosphate nucleotidase 2	IMPAD1	IMPAD1	IMPAD1	-0.228	0.517	-0.3	0.195	-0.009	0.95	Cytoplasm	enzyme
BROX	BRO1 domain and CAAX motif containing	BROX	BROX	BROX	0.595	0.363	0.336	0.167	-0.032	0.873	Cytoplasm	other
BSG	basigin (Ok blood group)	BSG	BSG	BSG	-0.247	0.181	0.102	0.64	-0.23	0.316	Plasma Membrane	transporter	disease progression,prognosis,response to therapy	metuximab
BST1	bone marrow stromal cell antigen 1	BST1	BST1	BST1	-0.785	0.679	0.258	0.755	0.196	0.798	Plasma Membrane	enzyme		MEN1112
BTF3L4	--	BTF3L4	BTF3L4	BTF3L4	-0.075	0.431	-0.084	0.743	-0.002	0.99	Other	other
BUB3	BUB3 mitotic checkpoint protein	BUB3	BUB3	BUB3	-0.118	0.539	-0.088	0.794	-0.227	0.344	Nucleus	other
BUD31	BUD31 homolog	BUD31	BUD31	BUD31	-0.067	0.397	0.168	0.42	-0.064	0.661	Nucleus	transcription regulator
BZW1	basic leucine zipper and W2 domains 1	BZW1	BZW1	BZW1	0.361	0.535	0.233	0.58	0.08	0.82	Cytoplasm	translation regulator
C2	complement C2	C2	C2	C2	-0.059	0.576	0.195	0.472	-0.189	0.546	Extracellular Space	peptidase
C3	complement C3	C3	C3	C3	-0.012	0.92	0.115	0.662	-0.142	0.296	Extracellular Space	peptidase	efficacy	IgG,pegcetacoplan
C5	complement C5	C5	C5	C5	-0.002	0.99	0.415	0.39	0.175	0.629	Extracellular Space	cytokine		eculizumab,IFX-1,IgG,ravulizumab,zilucoplan
C6	complement C6	C6	C6	C6	0.402	0.205	0.213	0.0653	-0.083	0.795	Extracellular Space	other
C7	complement C7	C7	C7	C7	-0.191	0.259	0.04	0.808	0.031	0.922	Extracellular Space	other
C9	complement C9	C9	C9	C9	-0.034	0.858	0.19	0.583	0.012	0.961	Extracellular Space	other	unspecified application
C11orf68	chromosome 11 open reading frame 68	C11orf68	C11orf68	C11orf68	0.074	0.453	-0.042	0.772	0.221	0.182	Other	other
C1orf198	chromosome 1 open reading frame 198	C1orf198	C1orf198	C1orf198	-0.131	0.241	-0.092	0.822	-0.2	0.226	Cytoplasm	other
C1QB	complement C1q B chain	C1QB	C1QB	C1QB	0.15	0.335	-0.079	0.757	0.036	0.749	Extracellular Space	other
C1QBP	complement C1q binding protein	C1QBP	C1QBP	C1QBP	-0.146	0.321	-0.049	0.846	-0.05	0.789	Cytoplasm	transcription regulator
C1QC	complement C1q C chain	C1QC	C1QC	C1QC	-0.384	0.142	-0.298	0.442	-0.112	0.295	Extracellular Space	other
C1R	complement C1r	C1R	C1R	C1R	0.239	0.467	0.712	0.363	0.705	0.134	Extracellular Space	peptidase		SERPING1
C1S	complement C1s	C1S	C1S	C1S	0.082	0.498	0.353	0.246	0.123	0.391	Extracellular Space	peptidase		SERPING1,sutimlimab
C4A/C4B	complement C4A (Rodgers blood group)	C4A	C4A	C4A	0.054	0.15	0.317	0.0583	-0.178	0.179	Extracellular Space	other		IgG
C4BPA	complement component 4 binding protein alpha	C4BPA	C4BPA	C4BPA	0.063	0.259	0.238	0.38	0.183	0.135	Extracellular Space	other
C8A	complement C8 alpha chain	C8A	C8A	C8A	0.434		-0.206		0.106		Extracellular Space	other
C8B	complement C8 beta chain	C8B	C8B	C8B	0.036	0.76	0.241	0.545	0.252	0.365	Extracellular Space	other
C8G	complement C8 gamma chain	C8G	C8G	C8G	-0.09	0.668	-0.086	0.715	-0.17	0.367	Extracellular Space	transporter
CA1	carbonic anhydrase 1	CA1	CA1	CA1	-0.023	0.949	0.43	0.247	0.098	0.837	Cytoplasm	enzyme		acetazolamide,benzthiazide,brimonidine/brinzolamide,brinzolamide,chlorothiazide,chlorothiazide/reserpine,chlorthalidone,diazoxide,dichlorphenamide,dorzolamide,dorzolamide/timolol,ethoxyzolamide,hydrochlorothiazide,methazolamide,quinethazone,sulfacetamide,topiramate,trichloromethiazide
CA2	carbonic anhydrase 2	CA2	CA2	CA2	-0.663	0.319	-0.393	0.527	-0.518	0.466	Cytoplasm	enzyme	diagnosis,unspecified application	acetazolamide,benzthiazide,brimonidine/brinzolamide,brinzolamide,chlorothiazide,chlorothiazide/reserpine,chlorthalidone,diazoxide,dichlorphenamide,dorzolamide,dorzolamide/timolol,ethoxyzolamide,hydrochlorothiazide,methazolamide,phentermine/topiramate,quinethazone,sulfacetamide,topiramate,trichloromethiazide
CA4	carbonic anhydrase 4	CA4	CA4	CA4	0.176		0.408		-0.1		Plasma Membrane	enzyme		acetazolamide,benzthiazide,chlorothiazide,chlorothiazide/reserpine,chlorthalidone,dichlorphenamide,ethoxyzolamide,hydrochlorothiazide,methazolamide,phentermine/topiramate,sulfacetamide,topiramate,trichloromethiazide
CAB39	calcium binding protein 39	CAB39	CAB39	CAB39	-0.049	0.698	0.057	0.761	0.073	0.562	Cytoplasm	enzyme
CACYBP	calcyclin binding protein	CACYBP	CACYBP	CACYBP	-0.02	0.833	-0.15	0.577	-0.114	0.562	Nucleus	other
CAD	carbamoyl-phosphate synthetase 2, aspartate transcarbamylase, and dihydroorotase	CAD	CAD	CAD	0.18	0.233	0.4	0.0914	0.207	0.329	Cytoplasm	enzyme
CALD1	caldesmon 1	CALD1	CALD1	CALD1	0.093	0.522	0.242	0.607	0.413	0.284	Cytoplasm	other
CALM1 (includes others)	calmodulin 1	CALM1	CALM1	CALM1	-0.018	0.799	-0.099	0.393	-0.012	0.888	Cytoplasm	other
CALML3	calmodulin like 3	CALML3	CALML3	CALML3	-0.093	0.921	0.044	0.93	-0.435	0.563	Cytoplasm	other
CALML5	calmodulin like 5	CALML5	CALML5	CALML5	0.878	0.000471	0.483	0.563	0.541	0.361	Cytoplasm	other
CALR	calreticulin	CALR	CALR	CALR	-0.132	0.304	-0.116	0.395	-0.056	0.772	Cytoplasm	transcription regulator	efficacy,unspecified application
CALU	calumenin	CALU	CALU	CALU	-0.106	0.316	-0.241	0.186	-0.103	0.404	Cytoplasm	other
CAMK2D	calcium/calmodulin dependent protein kinase II delta	CAMK2D	CAMK2D	CAMK2D	-0.065	0.548	-0.191	0.297	-0.075	0.595	Cytoplasm	kinase
CAMK2G	calcium/calmodulin dependent protein kinase II gamma	CAMK2G	CAMK2G	CAMK2G	0.035	0.92	0.953	0.288	0.049	0.946	Cytoplasm	kinase
CAND1	cullin associated and neddylation dissociated 1	CAND1	CAND1	CAND1	-0.057	0.646	-0.026	0.868	-0.055	0.557	Cytoplasm	transcription regulator
CANX	calnexin	CANX	CANX	CANX	-0.155	0.534	0.283	0.429	0.041	0.772	Cytoplasm	other	efficacy
CAP1	cyclase associated actin cytoskeleton regulatory protein 1	CAP1	CAP1	CAP1	-0.112	0.154	-0.041	0.682	-0.043	0.782	Plasma Membrane	other
CAP2	cyclase associated actin cytoskeleton regulatory protein 2	CAP2	CAP2	CAP2	0.094	0.675	0.214	0.356	0.153	0.658	Plasma Membrane	other	disease progression
CAPG	capping actin protein, gelsolin like	CAPG	CAPG	CAPG	-0.051	0.718	0.072	0.363	-0.083	0.642	Nucleus	other
CAPN1	calpain 1	CAPN1	CAPN1	CAPN1	-0.106	0.0984	0.007	0.868	-0.054	0.311	Cytoplasm	peptidase		alicapistat,BLD-2660
CAPN2	calpain 2	CAPN2	CAPN2	CAPN2	-0.031	0.624	0.092	0.299	-0.175	0.119	Cytoplasm	peptidase		alicapistat,BLD-2660
CAPNS1	calpain small subunit 1	CAPNS1	CAPNS1	CAPNS1	-0.182	0.0465	-0.194	0.3	-0.504	0.0535	Cytoplasm	peptidase
CAPRIN1	cell cycle associated protein 1	CAPRIN1	CAPRIN1	CAPRIN1	-0.307	0.0167	-0.387	0.0682	-0.368	0.0216	Plasma Membrane	other
CAPS	calcyphosine	CAPS	CAPS	CAPS	-0.506	0.398	-0.581	0.402	-0.832	0.185	Cytoplasm	other
CAPZA1	capping actin protein of muscle Z-line subunit alpha 1	CAPZA1	CAPZA1	CAPZA1	-0.029	0.917	-0.016	0.943	-0.031	0.9	Cytoplasm	other
CAPZA2	capping actin protein of muscle Z-line subunit alpha 2	CAPZA2	CAPZA2	CAPZA2	-0.043	0.636	0.08	0.601	-0.094	0.477	Cytoplasm	other
CAPZB	capping actin protein of muscle Z-line subunit beta	CAPZB	CAPZB	CAPZB	-0.143	0.36	-0.126	0.443	-0.171	0.341	Cytoplasm	other
CARS1	cysteinyl-tRNA synthetase 1	CARS	CARS	CARS	-0.083	0.636	-0.044	0.812	-0.172	0.512	Cytoplasm	enzyme
CASK	calcium/calmodulin dependent serine protein kinase	CASK	CASK	CASK	-0.093	0.655	-0.083	0.69	-0.008	0.956	Plasma Membrane	kinase
CASP14	caspase 14	CASP14	CASP14	CASP14	1.083	0.0692	0.716	0.0487	0.774	0.0464	Cytoplasm	peptidase
CAST	calpastatin	CAST	CAST	CAST	0.064	0.785	0.15	0.337	0.034	0.816	Cytoplasm	peptidase
CAT	catalase	CAT	CAT	CAT	-0.071	0.501	0.272	0.262	0.095	0.448	Cytoplasm	enzyme	diagnosis	fomepizole
CAV1	caveolin 1	CAV1	CAV1	CAV1	-0.363	0.468	0.423	0.464	0.106	0.172	Plasma Membrane	transmembrane receptor	diagnosis
CAV2	caveolin 2	CAV2	CAV2	CAV2	0.127	0.602	0.46	0.113	0.35	0.0949	Plasma Membrane	other
CAVIN1	caveolae associated protein 1	PTRF	PTRF	PTRF	-0.052	0.333	-0.022	0.867	0.088	0.29	Nucleus	transcription regulator
CAVIN2	caveolae associated protein 2	SDPR	SDPR	SDPR	-0.036	0.827	0.102	0.617	0.22	0.38	Plasma Membrane	other
CAVIN3	caveolae associated protein 3	PRKCDBP	PRKCDBP	PRKCDBP	-0.008	0.66	0.13	0.407	0.114	0.38	Cytoplasm	other
CBR1	carbonyl reductase 1	CBR1	CBR1	CBR1	-0.091	0.298	-0.074	0.589	-0.077	0.517	Cytoplasm	enzyme
CBR3	carbonyl reductase 3	CBR3	CBR3	CBR3	0.26	0.459	0.332	0.231	0.33	0.129	Cytoplasm	enzyme
CBX1	chromobox 1	CBX1	CBX1	CBX1	0.2	0.417	0.081	0.783	0.252	0.326	Nucleus	transcription regulator
CBX3	chromobox 3	CBX3	CBX3	CBX3	-0.015	0.913	-0.04	0.781	0.002	0.984	Nucleus	transcription regulator
CBX5	chromobox 5	CBX5	CBX5	CBX5	0.084	0.344	0.066	0.586	-0.04	0.715	Nucleus	transcription regulator
CCAR2	cell cycle and apoptosis regulator 2	KIAA1967	KIAA1967	KIAA1967	0.052	0.679	0.157	0.264	0.14	0.378	Cytoplasm	peptidase
CCDC6	coiled-coil domain containing 6	CCDC6	CCDC6	CCDC6	-0.069	0.832	0.465	0.455	0.521	0.144	Cytoplasm	other
CCDC22	coiled-coil domain containing 22	CCDC22	CCDC22	CCDC22	0.229				-0.097		Cytoplasm	other
CCDC93	coiled-coil domain containing 93	CCDC93	CCDC93	CCDC93	0.201	0.241	0.622	0.0468	0.001	0.996	Extracellular Space	other
CCDC124	coiled-coil domain containing 124	CCDC124	CCDC124	CCDC124	0.673		0.06		0.088		Other	other
CCT2	chaperonin containing TCP1 subunit 2	CCT2	CCT2	CCT2	0.06	0.401	0.089	0.48	0.118	0.284	Cytoplasm	kinase
CCT3	chaperonin containing TCP1 subunit 3	CCT3	CCT3	CCT3	0.063	0.0567	0.067	0.519	0.072	0.382	Cytoplasm	other
CCT4	chaperonin containing TCP1 subunit 4	CCT4	CCT4	CCT4	0.005	0.935	0.054	0.619	0.06	0.363	Cytoplasm	other
CCT5	chaperonin containing TCP1 subunit 5	CCT5	CCT5	CCT5	-0.17	0.033	-0.228	0.0395	-0.2	0.0308	Cytoplasm	other
CCT7	chaperonin containing TCP1 subunit 7	CCT7	CCT7	CCT7	0.073	0.107	0.109	0.406	0.043	0.735	Cytoplasm	other
CCT8	chaperonin containing TCP1 subunit 8	CCT8	CCT8	CCT8	0.031	0.498	0.054	0.495	0.034	0.7	Cytoplasm	enzyme
CCT6A	chaperonin containing TCP1 subunit 6A	CCT6A	CCT6A	CCT6A	-0.027	0.687	0.013	0.862	-0.003	0.916	Cytoplasm	other
CD9	CD9 molecule	CD9	CD9	CD9	-0.485	0.323	-0.301	0.479	-0.235	0.0721	Plasma Membrane	other	efficacy
CD34	CD34 molecule	CD34	CD34	CD34	0.018	0.861	0.378	0.0579	0.007	0.912	Plasma Membrane	other	efficacy,prognosis,unspecified application
CD44	CD44 molecule (Indian blood group)	CD44	CD44	CD44	-0.179	0.572	-0.078	0.813	-0.027	0.903	Plasma Membrane	other	diagnosis,disease progression,prognosis,unspecified application	A6 peptide,AMC303,anti-CD44v7 antibody,RO5429083
CD47	CD47 molecule	CD47	CD47	CD47	-0.202	0.326	0.169	0.639	0.016	0.869	Plasma Membrane	transmembrane receptor	unspecified application	ALX148,AO-176,CC-90002,HX009,IBI322,magrolimab,TJ011133,TTI-621,TTI-622
CD55	CD55 molecule (Cromer blood group)	CD55	CD55	CD55	0.125	0.272	0.186	0.32	0.121	0.273	Plasma Membrane	other
CD59	CD59 molecule (CD59 blood group)	CD59	CD59	CD59	0.028	0.82	0.226	0.251	0.181	0.0896	Plasma Membrane	other
CD63	CD63 molecule	CD63	CD63	CD63	-0.613	0.302	-0.049	0.88	-0.421	0.101	Plasma Membrane	other
CD74	CD74 molecule	CD74	CD74	CD74	0.322	0.282	1.311	0.445	0.282	0.52	Plasma Membrane	transmembrane receptor		milatuzumab,milatuzumab-doxorubicin antibody-drug conjugate
CD81	CD81 molecule	CD81	CD81	CD81	-0.022	0.952	0.312	0.528	-0.098	0.606	Plasma Membrane	other
CD82	CD82 molecule	CD82	CD82	CD82	-0.325	0.466	-0.064	0.851	-0.079	0.797	Plasma Membrane	other
CD99	CD99 molecule (Xg blood group)	CD99	CD99	CD99	0.142	0.0222	0.733	0.156	0.427	0.2	Plasma Membrane	other
CD109	CD109 molecule	CD109	CD109	CD109	-0.07	0.46	-0.041	0.7	0.095	0.0763	Plasma Membrane	other
CDC37	cell division cycle 37, HSP90 cochaperone	CDC37	CDC37	CDC37	-0.003	0.978	0.037	0.811	-0.015	0.894	Cytoplasm	other
CDC42	cell division cycle 42	CDC42	CDC42	CDC42	-0.309	0.184	0.031	0.925	-0.107	0.432	Cytoplasm	enzyme
CDC42BPB	CDC42 binding protein kinase beta	CDC42BPB	CDC42BPB	CDC42BPB	-0.151	0.75	0.473	0.313	0.479	0.0209	Cytoplasm	kinase
CDH1	cadherin 1	CDH1	CDH1	CDH1	0.268	0.0826	0.329	0.36	0.16	0.464	Plasma Membrane	other	diagnosis,disease progression,efficacy,prognosis
CDH13	cadherin 13	CDH13	CDH13	CDH13	-0.544	0.038	-0.108	0.807	0.066	0.841	Plasma Membrane	other	diagnosis,disease progression,prognosis
CDK5RAP3	CDK5 regulatory subunit associated protein 3	CDK5RAP3	CDK5RAP3	CDK5RAP3	0.233	0.0804	0.219	0.47	-0.024	0.813	Nucleus	other
CEACAM5	CEA cell adhesion molecule 5	CEACAM5	CEACAM5	CEACAM5	0.006	0.984	0.224	0.299	0.221	0.658	Plasma Membrane	other		cergutuzumab amunaleukin,labetuzumab govitecan,SAR408701
CES1	carboxylesterase 1	CES1	CES1	CES1	0.09	0.324	0.204	0.407	0.113	0.218	Cytoplasm	enzyme
CES2	carboxylesterase 2	CES2	CES2	CES2	0.985	0.0479	0.694	0.0324	0.776	0.0166	Cytoplasm	enzyme
CETN2	centrin 2	CETN2	CETN2	CETN2	0.243	0.0968	0.361	0.0895	-0.01	0.13	Nucleus	enzyme
CFB	complement factor B	CFB	CFB	CFB	-0.058	0.768	-0.062	0.839	-0.156	0.405	Extracellular Space	peptidase	unspecified application	IONIS-FB-LRx
CFD	complement factor D	CFD	CFD	CFD	0.032	0.897	-0.086	0.853	0.036	0.745	Extracellular Space	peptidase
CFH	complement factor H	CFH	CFH	CFH	0.059	0.443	0.073	0.732	-0.034	0.755	Extracellular Space	other	unspecified application
CFHR1	complement factor H related 1	CFHR1	CFHR1	CFHR1	-0.258		-0.013		-0.343		Extracellular Space	other
CFHR2	complement factor H related 2	CFHR2	CFHR2	CFHR2	0.167	0.405	0.095	0.788	0.53	0.065	Extracellular Space	other
CFI	complement factor I	CFI	CFI	CFI	0.053	0.871	0.471	0.257	-0.063	0.863	Extracellular Space	peptidase
CFL1	cofilin 1	CFL1	CFL1	CFL1	-0.036	0.752	-0.091	0.65	-0.127	0.551	Nucleus	other
CFL2	cofilin 2	CFL2	CFL2	CFL2	0.573		0.065		0.175		Extracellular Space	other
CGNL1	cingulin like 1	CGNL1	CGNL1	CGNL1	0.213	0.158	0.575	0.184	0.381	0.313	Plasma Membrane	other
CHCHD3	coiled-coil-helix-coiled-coil-helix domain containing 3	CHCHD3	CHCHD3	CHCHD3	0.081		-0.029		0.045		Cytoplasm	transcription regulator
CHD4	chromodomain helicase DNA binding protein 4	CHD4	CHD4	CHD4	0.067	0.779	0.436	0.146	0.146	0.482	Nucleus	enzyme
CHID1	chitinase domain containing 1	CHID1	CHID1	CHID1	0.499	0.262	0.526	0.288	0.817	0.283	Extracellular Space	other
CHMP4B	charged multivesicular body protein 4B	CHMP4B	CHMP4B	CHMP4B	-0.083	0.475	0.139	0.192	0	0.999	Cytoplasm	other
CIAPIN1	cytokine induced apoptosis inhibitor 1	CIAPIN1	CIAPIN1	CIAPIN1	0.327	0.0648	0.135	0.709	0.102	0.297	Cytoplasm	other
CILP	cartilage intermediate layer protein	CILP	CILP	CILP	-0.746		0.497		-1.168		Extracellular Space	phosphatase
CIRBP	cold inducible RNA binding protein	CIRBP	CIRBP	CIRBP	-0.133	0.122	0.239	0.497	0.262	0.391	Nucleus	translation regulator
CISD1	CDGSH iron sulfur domain 1	CISD1	CISD1	CISD1	-0.69	0.275	-0.472	0.386	-0.903	0.25	Cytoplasm	other
CKAP4	cytoskeleton associated protein 4	CKAP4	CKAP4	CKAP4	0.047	0.769	0.17	0.459	0.08	0.442	Cytoplasm	other
CKAP5	cytoskeleton associated protein 5	CKAP5	CKAP5	CKAP5	0.31	0.242	0.505	0.0191	0.441	0.136	Nucleus	transcription regulator
CKB	creatine kinase B	CKB	CKB	CKB	-0.046	0.585	-0.032	0.597	-0.092	0.608	Cytoplasm	kinase	safety
CKMT1A/CKMT1B	creatine kinase, mitochondrial 1B	CKMT1A	CKMT1A	CKMT1A	-0.592	0.322	-0.578	0.186	-0.962	0.277	Cytoplasm	kinase
CLCA4	chloride channel accessory 4	CLCA4	CLCA4	CLCA4	-0.459	0.257	-0.014	0.973	-0.131	0.855	Plasma Membrane	ion channel
CLEC3B	C-type lectin domain family 3 member B	CLEC3B	CLEC3B	CLEC3B	0.019	0.942	-0.219	0.402	-0.049	0.865	Extracellular Space	other
CLIC1	chloride intracellular channel 1	CLIC1	CLIC1	CLIC1	0.027	0.799	-0.031	0.767	-0.023	0.881	Nucleus	ion channel
CLIC2	chloride intracellular channel 2	CLIC2	CLIC2	CLIC2	-0.017	0.799	-0.004	0.94	-0.095	0.0438	Cytoplasm	enzyme
CLIC3	chloride intracellular channel 3	CLIC3	CLIC3	CLIC3	0.904	0.0304	0.748	0.0761	0.265	0.314	Nucleus	ion channel
CLIC4	chloride intracellular channel 4	CLIC4	CLIC4	CLIC4	-0.026	0.756	0.149	0.259	0.22	0.134	Plasma Membrane	ion channel
CLIC5	chloride intracellular channel 5	CLIC5	CLIC5	CLIC5	0.186	0.267	0.124	0.852	0.002	0.992	Cytoplasm	ion channel
CLIC6	chloride intracellular channel 6	CLIC6	CLIC6	CLIC6	-0.553	0.455	-0.522	0.458	-1.093	0.232	Plasma Membrane	ion channel
CLINT1	clathrin interactor 1	CLINT1	CLINT1	CLINT1	0.059	0.75	0.094	0.693	-0.024	0.888	Cytoplasm	other
CLIP1	CAP-Gly domain containing linker protein 1	CLIP1	CLIP1	CLIP1	-0.013	0.946	0.303	0.439	-0.18	0.00233	Cytoplasm	other
CLPP	caseinolytic mitochondrial matrix peptidase proteolytic subunit	CLPP	CLPP	CLPP	-0.092	0.228	-0.05	0.802	0.008	0.957	Cytoplasm	peptidase
CLTA	clathrin light chain A	CLTA	CLTA	CLTA	-0.286	0.194	-0.219	0.18	-0.19	0.408	Plasma Membrane	other
CLTB	clathrin light chain B	CLTB	CLTB	CLTB	-0.119	0.435	-0.19	0.171	-0.133	0.418	Plasma Membrane	other
CLTC	clathrin heavy chain	CLTC	CLTC	CLTC	-0.081	0.425	-0.077	0.572	-0.066	0.569	Plasma Membrane	other
CLU	clusterin	CLU	CLU	CLU	-0.152	0.508	0.112	0.616	-0.122	0.544	Cytoplasm	other	efficacy,unspecified application	clusterin antisense oligonucleotide
CMA1	chymase 1	CMA1	CMA1	CMA1	-0.22	0.0364	-0.189	0.703	-0.32	0.0205	Extracellular Space	peptidase
CMAS	cytidine monophosphate N-acetylneuraminic acid synthetase	CMAS	CMAS	CMAS	0.043	0.816	0.082	0.0348	-0.13	0.283	Nucleus	enzyme
CMBL	carboxymethylenebutenolidase homolog	CMBL	CMBL	CMBL	-0.254	0.204	0.121	0.511	-0.399	0.0262	Cytoplasm	enzyme
CMPK1	cytidine/uridine monophosphate kinase 1	CMPK1	CMPK1	CMPK1	-0.079	0.823	-0.595	0.552	-0.627	0.331	Nucleus	kinase
CNBP	CCHC-type zinc finger nucleic acid binding protein	CNBP	CNBP	CNBP	0.215	0.333	0.014	0.933	0.031	0.642	Nucleus	transcription regulator
CNDP2	carnosine dipeptidase 2	CNDP2	CNDP2	CNDP2	-0.165	0.11	0.045	0.524	-0.186	0.158	Cytoplasm	peptidase
CNN1	calponin 1	CNN1	CNN1	CNN1	0.268	0.683	0.079	0.943	0.495	0.652	Cytoplasm	other
CNN2	calponin 2	CNN2	CNN2	CNN2	0.181	0.466	0.088	0.763	-0.568	0.408	Cytoplasm	other
CNN3	calponin 3	CNN3	CNN3	CNN3	0.102	0.546	0.158	0.502	0.408	0.0883	Cytoplasm	other
CNP	2',3'-cyclic nucleotide 3' phosphodiesterase	CNP	CNP	CNP	-0.151	0.28	0.208	0.331	0.013	0.918	Cytoplasm	enzyme
CNPY2	canopy FGF signaling regulator 2	CNPY2	CNPY2	CNPY2	0.009	0.981	-0.438	0.493	0.167	0.786	Plasma Membrane	other
COL12A1	collagen type XII alpha 1 chain	COL12A1	COL12A1	COL12A1	0.199	0.531	0.097	0.833	0.374	0.349	Extracellular Space	other		collagenase clostridium histolyticum
COL14A1	collagen type XIV alpha 1 chain	COL14A1	COL14A1	COL14A1	0.058	0.745	0.001	0.996	0.295	0.219	Extracellular Space	other		collagenase clostridium histolyticum
COL15A1	collagen type XV alpha 1 chain	COL15A1	COL15A1	COL15A1	-0.097	0.589	-0.073	0.593	0.109	0.221	Extracellular Space	other		collagenase clostridium histolyticum
COL16A1	collagen type XVI alpha 1 chain	COL16A1	COL16A1	COL16A1	0.07	0.519	0.257	0.309	0.062	0.501	Extracellular Space	other		collagenase clostridium histolyticum
COL18A1	collagen type XVIII alpha 1 chain	COL18A1	COL18A1	COL18A1	-0.035	0.767	0.009	0.978	0.168	0.443	Extracellular Space	other	diagnosis	collagenase clostridium histolyticum
COL1A1	collagen type I alpha 1 chain	COL1A1	COL1A1	COL1A1	-0.006	0.972	0.31	0.134	0.201	0.214	Extracellular Space	other	diagnosis	collagenase clostridium histolyticum
COL1A2	collagen type I alpha 2 chain	COL1A2	COL1A2	COL1A2	0.074	0.582	0.456	0.199	0.332	0.136	Extracellular Space	other		collagenase clostridium histolyticum
COL21A1	collagen type XXI alpha 1 chain	COL21A1	COL21A1	COL21A1	0.261	0.156	0.218	0.389	0.277	0.394	Extracellular Space	other		collagenase clostridium histolyticum
COL28A1	collagen type XXVIII alpha 1 chain	COL28A1	COL28A1	COL28A1	-0.314	0.13	-0.325	0.385	0.044	0.887	Extracellular Space	other
COL3A1	collagen type III alpha 1 chain	COL3A1	COL3A1	COL3A1	-0.036	0.905	0.272	0.25	0.078	0.729	Extracellular Space	other	diagnosis,efficacy	collagenase clostridium histolyticum
COL4A1	collagen type IV alpha 1 chain	COL4A1	COL4A1	COL4A1	-0.057	0.655	0.05	0.844	0.015	0.911	Extracellular Space	other	diagnosis	collagenase clostridium histolyticum
COL4A2	collagen type IV alpha 2 chain	COL4A2	COL4A2	COL4A2	-0.197	0.228	0.303	0.384	0.202	0.227	Extracellular Space	other		collagenase clostridium histolyticum
COL5A1	collagen type V alpha 1 chain	COL5A1	COL5A1	COL5A1	0.167	0.353	0.375	0.281	0.368	0.0432	Extracellular Space	other		collagenase clostridium histolyticum
COL5A2	collagen type V alpha 2 chain	COL5A2	COL5A2	COL5A2	0.169	0.236	0.396	0.237	0.313	0.13	Extracellular Space	other		collagenase clostridium histolyticum
COL6A1	collagen type VI alpha 1 chain	COL6A1	COL6A1	COL6A1	0.205	0.125	0.16	0.564	0.224	0.145	Extracellular Space	other		collagenase clostridium histolyticum
COL6A2	collagen type VI alpha 2 chain	COL6A2	COL6A2	COL6A2	0.117	0.525	-0.119	0.491	0.089	0.472	Extracellular Space	other		collagenase clostridium histolyticum
COL6A3	collagen type VI alpha 3 chain	COL6A3	COL6A3	COL6A3	0.018	0.917	-0.005	0.977	0.176	0.161	Extracellular Space	other		collagenase clostridium histolyticum
COL7A1	collagen type VII alpha 1 chain	COL7A1	COL7A1	COL7A1	-0.162	0.698	-0.142	0.699	-0.235	0.691	Extracellular Space	other		collagenase clostridium histolyticum
COMT	catechol-O-methyltransferase	COMT	COMT	COMT	-0.01	0.956	0.247	0.35	0.053	0.725	Cytoplasm	enzyme	diagnosis,efficacy,prognosis,unspecified application	BIA-3-202,carbidopa/entacapone/levodopa,carbidopa/levodopa/tolcapone,entacapone,opicapone,tolcapone
COPA	COPI coat complex subunit alpha	COPA	COPA	COPA	-0.021	0.767	-0.02	0.841	-0.099	0.521	Cytoplasm	transporter
COPB1	COPI coat complex subunit beta 1	COPB1	COPB1	COPB1	-0.16	0.411	-0.01	0.941	-0.143	0.356	Cytoplasm	transporter
COPB2	COPI coat complex subunit beta 2	COPB2	COPB2	COPB2	-0.183	0.34	-0.052	0.744	-0.059	0.775	Cytoplasm	transporter
COPE	COPI coat complex subunit epsilon	COPE	COPE	COPE	-0.091	0.489	-0.041	0.8	-0.098	0.54	Cytoplasm	transporter
COPG1	COPI coat complex subunit gamma 1	COPG1	COPG1	COPG1	-0.104	0.634	-0.046	0.824	-0.087	0.755	Cytoplasm	transporter
COPS2	COP9 signalosome subunit 2	COPS2	COPS2	COPS2	-0.078	0.708	-0.025	0.886	-0.258	0.102	Cytoplasm	other
COPS4	COP9 signalosome subunit 4	COPS4	COPS4	COPS4	-0.121	0.0364	0.093	0.308	0.02	0.842	Cytoplasm	peptidase
COPS5	COP9 signalosome subunit 5	COPS5	COPS5	COPS5	-0.061	0.803	0.162	0.381	0.127	0.19	Nucleus	transcription regulator
COPS6	COP9 signalosome subunit 6	COPS6	COPS6	COPS6	0.154	0.78	0.03	0.935	-0.202	0.419	Nucleus	other
COPS8	COP9 signalosome subunit 8	COPS8	COPS8	COPS8	-0.109	0.85	0.073	0.843	0.143	0.729	Nucleus	other
COPZ1	COPI coat complex subunit zeta 1	COPZ1	COPZ1	COPZ1	-0.23	0.56	0.083	0.885	-0.06	0.878	Cytoplasm	transporter
CORO1A	coronin 1A	CORO1A	CORO1A	CORO1A	-0.215	0.463	-0.084	0.766	-0.252	0.549	Cytoplasm	other
CORO1B	coronin 1B	CORO1B	CORO1B	CORO1B	0.201	0.14	-0.049	0.73	0.005	0.95	Cytoplasm	other
CORO1C	coronin 1C	CORO1C	CORO1C	CORO1C	0.083	0.662	-0.174	0.435	-0.033	0.89	Cytoplasm	other
COTL1	coactosin like F-actin binding protein 1	COTL1	COTL1	COTL1	-0.299	0.224	-0.176	0.492	-0.234	0.525	Cytoplasm	other
COX4I1	cytochrome c oxidase subunit 4I1	COX4I1	COX4I1	COX4I1	-0.194	0.315	-0.095	0.734	-0.006	0.978	Cytoplasm	enzyme
COX5A	cytochrome c oxidase subunit 5A	COX5A	COX5A	COX5A	-0.282	0.00298	-0.168	0.225	-0.233	0.226	Cytoplasm	enzyme
COX5B	cytochrome c oxidase subunit 5B	COX5B	COX5B	COX5B	-0.127	0.428	-0.047	0.692	0.025	0.886	Cytoplasm	enzyme
COX6B1	cytochrome c oxidase subunit 6B1	COX6B1	COX6B1	COX6B1	-0.139	0.207	-0.113	0.573	0.004	0.987	Cytoplasm	enzyme
COX7A2	cytochrome c oxidase subunit 7A2	COX7A2	COX7A2	COX7A2	-0.157	0.358	0.12	0.642	-0.06	0.832	Cytoplasm	enzyme
COX7C	cytochrome c oxidase subunit 7C	COX7C	COX7C	COX7C	-0.01	0.929	-0.179	0.491	-0.215	0.469	Cytoplasm	enzyme
CP	ceruloplasmin	CP	CP	CP	-0.058	0.801	0.182	0.648	-0.177	0.357	Extracellular Space	enzyme	efficacy
CPA3	carboxypeptidase A3	CPA3	CPA3	CPA3	-0.099	0.66	0.012	0.961	-0.183	0.526	Extracellular Space	peptidase
CPNE1	copine 1	CPNE1	CPNE1	CPNE1	0.117	0.47	0.166	0.399	0.027	0.867	Nucleus	transporter
CPNE3	copine 3	CPNE3	CPNE3	CPNE3	-0.046	0.207	0.037	0.693	0.026	0.822	Cytoplasm	kinase
CPPED1	calcineurin like phosphoesterase domain containing 1	CPPED1	CPPED1	CPPED1	0.124	0.3	0.26	0.38	0.136	0.442	Cytoplasm	enzyme
CPT2	carnitine palmitoyltransferase 2	CPT2	CPT2	CPT2	0.482	0.281	0.043	0.964	0.227	0.71	Cytoplasm	enzyme	unspecified application	perhexiline
CPVL	carboxypeptidase vitellogenic like	CPVL	CPVL	CPVL	0.123	0.555	0.213	0.374	0.368	0.292	Cytoplasm	peptidase
CRABP2	cellular retinoic acid binding protein 2	CRABP2	CRABP2	CRABP2	-0.013	0.972	-0.286	0.51	-0.278	0.534	Cytoplasm	transporter
CRCT1	cysteine rich C-terminal 1	CRCT1	CRCT1	CRCT1	1.995		1.351		-0.45		Other	other
CREBBP	CREB binding protein	CREBBP	CREBBP	CREBBP	0.393	0.17	0.397		0.07	0.653	Nucleus	transcription regulator		CCS1477,PRI-724
CRIP2	cysteine rich protein 2	CRIP2	CRIP2	CRIP2	0.11	0.718	0.171	0.634	0.236	0.387	Nucleus	other
CRISP3	cysteine rich secretory protein 3	CRISP3	CRISP3	CRISP3	0.668		0.237		0.019		Extracellular Space	other	unspecified application
CRK	CRK proto-oncogene, adaptor protein	CRK	CRK	CRK	-0.063	0.322	0.072	0.588	-0.014	0.849	Cytoplasm	other
CRKL	CRK like proto-oncogene, adaptor protein	CRKL	CRKL	CRKL	-0.095	0.356	-0.011	0.932	-0.082	0.532	Cytoplasm	kinase
CRNN	cornulin	CRNN	CRNN	CRNN	0.219	0.738	0.202	0.686	-0.215	0.705	Cytoplasm	other
CROCC	ciliary rootlet coiled-coil, rootletin	CROCC	CROCC	CROCC	0.13	0.427	0.485	0.0389	0.126	0.622	Plasma Membrane	other
CROT	carnitine O-octanoyltransferase	CROT	CROT	CROT	-0.123	0.639	-0.012	0.952	-0.192	0.737	Cytoplasm	enzyme
CRYAB	crystallin alpha B	CRYAB	CRYAB	CRYAB	0.209	0.305	0.165	0.651	0.274	0.363	Nucleus	other	diagnosis,disease progression,prognosis,unspecified application
CRYBG1	crystallin beta-gamma domain containing 1	AIM1	AIM1	AIM1	0.467	0.405	0.294	0.434	0.248	0.481	Extracellular Space	other	diagnosis,disease progression,prognosis
CRYL1	crystallin lambda 1	CRYL1	CRYL1	CRYL1	-0.113	0.257	0.178	0.456	-0.204	0.111	Cytoplasm	enzyme
CRYM	crystallin mu	CRYM	CRYM	CRYM	0.17	0.379	0.151	0.385	0.41	0.139	Cytoplasm	enzyme
CRYZ	crystallin zeta	CRYZ	CRYZ	CRYZ	0.117	0.274	0.202	0.253	0.064	0.661	Cytoplasm	enzyme
CS	citrate synthase	CS	CS	CS	-0.141	0.182	0.102	0.685	0.086	0.659	Cytoplasm	enzyme
CSDE1	cold shock domain containing E1	CSDE1	CSDE1	CSDE1	-0.16	0.334	-0.08	0.401	-0.195	0.0503	Cytoplasm	enzyme
CSE1L	chromosome segregation 1 like	CSE1L	CSE1L	CSE1L	0.108	0.59	0.295	0.0988	-0.28	0.241	Nucleus	transporter
CSNK2A1	casein kinase 2 alpha 1	CSNK2A1	CSNK2A1	CSNK2A1	-0.08	0.0943	-0.1	0.443	-0.111	0.355	Nucleus	kinase
CSNK2B	casein kinase 2 beta	CSNK2B	CSNK2B	CSNK2B	-0.12	0.601	-0.165	0.414	0.034	0.868	Cytoplasm	kinase
CSRP1	cysteine and glycine rich protein 1	CSRP1	CSRP1	CSRP1	0.031	0.891	0.294	0.593	0.308	0.475	Nucleus	other
CSRP2	cysteine and glycine rich protein 2	CSRP2	CSRP2	CSRP2	0.013	0.889	0.38	0.304	0.253	0.501	Nucleus	other
CST3	cystatin C	CST3	CST3	CST3	-0.177	0.684	0.352	0.467	-0.054	0.867	Extracellular Space	other	diagnosis,efficacy,prognosis,safety,unspecified application
CSTA	cystatin A	CSTA	CSTA	CSTA	0.121	0.914	0.294	0.727	0.198	0.776	Cytoplasm	other
CSTB	cystatin B	CSTB	CSTB	CSTB	0.231	0.621	0.216	0.495	-0.105	0.799	Cytoplasm	peptidase	diagnosis
CTBP1	C-terminal binding protein 1	CTBP1	CTBP1	CTBP1	0.024	0.822	0.161	0.526	-0.004	0.979	Nucleus	enzyme
CTBP2	C-terminal binding protein 2	CTBP2	CTBP2	CTBP2	0.11	0.475	0.59	0.177	0.452	0.423	Nucleus	transcription regulator
CTNNA1	catenin alpha 1	CTNNA1	CTNNA1	CTNNA1	-0.056	0.656	0.061	0.748	-0.087	0.59	Plasma Membrane	other	diagnosis
CTNNA2	catenin alpha 2	CTNNA2	CTNNA2	CTNNA2	0.147	0.392	1.037		0.832	0.00455	Plasma Membrane	other
CTNNB1	catenin beta 1	CTNNB1	CTNNB1	CTNNB1	-0.062	0.706	-0.039	0.889	-0.137	0.448	Nucleus	transcription regulator	diagnosis,disease progression,efficacy,prognosis	PRI-724
CTNND1	catenin delta 1	CTNND1	CTNND1	CTNND1	-0.043	0.767	0.044	0.739	0.039	0.688	Nucleus	other
CTSB	cathepsin B	CTSB	CTSB	CTSB	-0.024	0.878	-0.091	0.712	-0.074	0.824	Cytoplasm	peptidase
CTSC	cathepsin C	CTSC	CTSC	CTSC	-0.211	0.437	0.116	0.802	0.288	0.161	Cytoplasm	peptidase	unspecified application
CTSD	cathepsin D	CTSD	CTSD	CTSD	-0.209	0.319	-0.233	0.355	-0.183	0.522	Cytoplasm	peptidase	diagnosis,unspecified application
CTSG	cathepsin G	CTSG	CTSG	CTSG	-0.199	0.469	-0.06	0.817	0.009	0.982	Cytoplasm	peptidase	response to therapy	2-O,3-O-desulfated heparin
CTTN	cortactin	CTTN	CTTN	CTTN	-0.039	0.765	-0.002	0.984	0.189	0.292	Plasma Membrane	other	efficacy
CUL1	cullin 1	CUL1	CUL1	CUL1	-0.264	0.0874	0.078	0.149	0.044	0.814	Nucleus	enzyme	diagnosis
CUL2	cullin 2	CUL2	CUL2	CUL2	0.094	0.356	0.285	0.0461	0.149	0.0034	Nucleus	enzyme
CUL3	cullin 3	CUL3	CUL3	CUL3	-0.014	0.901	0.142	0.459	0.139	0.172	Nucleus	enzyme
CUL5	cullin 5	CUL5	CUL5	CUL5	-0.085	0.56	-0.102	0.662	-0.078	0.455	Nucleus	ion channel
CUL4B	cullin 4B	CUL4B	CUL4B	CUL4B	-0.081	0.725	0.233	0.241	-0.12	0.515	Nucleus	other
CUTA	cutA divalent cation tolerance homolog	CUTA	CUTA	CUTA	-0.1	0.388	-0.152	0.125	-0.262	0.00862	Cytoplasm	other
CYB5A	cytochrome b5 type A	CYB5A	CYB5A	CYB5A	-0.089	0.773	-0.064	0.819	-0.022	0.936	Cytoplasm	enzyme
CYB5R1	cytochrome b5 reductase 1	CYB5R1	CYB5R1	CYB5R1	-0.054	0.838	0.235	0.469	0.031	0.862	Cytoplasm	enzyme
CYB5R3	cytochrome b5 reductase 3	CYB5R3	CYB5R3	CYB5R3	-0.166	0.564	0.306	0.292	0.124	0.236	Cytoplasm	enzyme
CYBC1	cytochrome b-245 chaperone 1	C17orf62	C17orf62	C17orf62	-0.479	0.36	0.285	0.139	-0.098	0.715	Cytoplasm	other
CYBRD1	cytochrome b reductase 1	CYBRD1	CYBRD1	CYBRD1	-0.138	0.524	0.07	0.92	-0.131	0.406	Cytoplasm	enzyme
CYCS	cytochrome c, somatic	CYCS	CYCS	CYCS	-0.324	0.162	-0.323	0.133	0.022	0.923	Cytoplasm	transporter
CYFIP1	cytoplasmic FMR1 interacting protein 1	CYFIP1	CYFIP1	CYFIP1	-0.095	0.405	0.056	0.746	0.04	0.54	Cytoplasm	translation regulator
CYGB	cytoglobin	CYGB	CYGB	CYGB	-0.009	0.956	0.088	0.682	0.076	0.761	Cytoplasm	transporter	diagnosis
CYRIB	CYFIP related Rac1 interactor B	FAM49B	FAM49B	FAM49B	-0.088	0.565	0.596	0.427	0.47	0.436	Extracellular Space	other
CZIB	CXXC motif containing zinc binding protein	C1orf123	C1orf123	C1orf123	-0.062	0.485	0.125	0.675	-0.021	0.953	Cytoplasm	other
DAD1	defender against cell death 1	DAD1	DAD1	DAD1	-0.13	0.587	0.127	0.834	-0.079	0.857	Cytoplasm	other
DAG1	dystroglycan 1	DAG1	DAG1	DAG1	-0.001	0.995	0.058	0.719	0.028	0.905	Plasma Membrane	transmembrane receptor
DARS1	aspartyl-tRNA synthetase 1	DARS	DARS	DARS	-0.059	0.561	0.011	0.924	-0.113	0.491	Cytoplasm	enzyme
DAZAP1	DAZ associated protein 1	DAZAP1	DAZAP1	DAZAP1	-0.097	0.291	0.127	0.644	0.261	0.459	Other	other
DBI	diazepam binding inhibitor, acyl-CoA binding protein	DBI	DBI	DBI	-0.158	0.445	-0.259	0.508	-0.272	0.506	Cytoplasm	other
DBN1	drebrin 1	DBN1	DBN1	DBN1	0.283	0.109	0.573	0.0641	0.36	0.245	Cytoplasm	other
DBNL	drebrin like	DBNL	DBNL	DBNL	0.064	0.729	0.306	0.0639	0.196	0.028	Cytoplasm	other	diagnosis
DBT	dihydrolipoamide branched chain transacylase E2	DBT	DBT	DBT	-0.259	0.57	0.078	0.84	0.426	0.349	Cytoplasm	enzyme
DCD	dermcidin	DCD	DCD	DCD	0.689	0.301	0.243	0.62	-0.22	0.642	Extracellular Space	other
DCN	decorin	DCN	DCN	DCN	0.274	0.2	0.156	0.618	0.294	0.252	Extracellular Space	other
DCPS	decapping enzyme, scavenger	DCPS	DCPS	DCPS	-0.172	0.0542	0.172	0.323	0.046	0.768	Nucleus	enzyme
DCTN1	dynactin subunit 1	DCTN1	DCTN1	DCTN1	-0.108	0.0926	0.064	0.502	-0.026	0.749	Cytoplasm	other
DCTN2	dynactin subunit 2	DCTN2	DCTN2	DCTN2	0.03	0.669	0.094	0.292	0.065	0.39	Cytoplasm	other
DCXR	dicarbonyl and L-xylulose reductase	DCXR	DCXR	DCXR	-0.078	0.774	0.068	0.763	-0.297	0.0382	Cytoplasm	enzyme
DDAH1	dimethylarginine dimethylaminohydrolase 1	DDAH1	DDAH1	DDAH1	0.007	0.975	0.033	0.893	-0.297	0.18	Cytoplasm	enzyme
DDAH2	dimethylarginine dimethylaminohydrolase 2	DDAH2	DDAH2	DDAH2	-0.016	0.826	0.227	0.35	0.108	0.651	Cytoplasm	enzyme
DDB1	damage specific DNA binding protein 1	DDB1	DDB1	DDB1	0	0.996	0.177	0.159	0.074	0.65	Nucleus	other
DDOST	dolichyl-diphosphooligosaccharide--protein glycosyltransferase non-catalytic subunit	DDOST	DDOST	DDOST	-0.138	0.537	-0.014	0.96	-0.094	0.596	Cytoplasm	enzyme
DDT	D-dopachrome tautomerase	DDT	DDT	DDT	-0.058	0.604	-0.112	0.577	-0.055	0.736	Cytoplasm	enzyme
DDX1	DEAD-box helicase 1	DDX1	DDX1	DDX1	0.042	0.424	-0.028	0.712	0.024	0.711	Nucleus	enzyme
DDX5	DEAD-box helicase 5	DDX5	DDX5	DDX5	-0.009	0.936	-0.079	0.532	0.053	0.76	Nucleus	enzyme	unspecified application
DDX6	DEAD-box helicase 6	DDX6	DDX6	DDX6	0.051	0.638	0.074	0.523	0.134	0.389	Nucleus	enzyme
DDX17	DEAD-box helicase 17	DDX17	DDX17	DDX17	-0.135	0.0935	-0.105	0.398	-0.074	0.584	Nucleus	enzyme	unspecified application
DDX21	DExD-box helicase 21	DDX21	DDX21	DDX21	-0.084	0.759	-0.015	0.95	-0.018	0.922	Nucleus	enzyme
DDX23	DEAD-box helicase 23	DDX23	DDX23	DDX23	-0.233	0.273	0.16	0.376	-0.263	0.472	Nucleus	enzyme
DDX19A	DEAD-box helicase 19A	DDX19A	DDX19A	DDX19A	0.216	0.0263	0.25	0.0275	0.034	0.73	Nucleus	enzyme
DDX39A	DExD-box helicase 39A	DDX39A	DDX39A	DDX39A	0.497	0.216	0.484	0.422	1.001	0.293	Nucleus	enzyme
DDX39B	DExD-box helicase 39B	DDX39B	DDX39B	DDX39B	-0.143	0.11	-0.287	0.227	-0.185	0.253	Nucleus	enzyme	safety
DDX3X	DEAD-box helicase 3 X-linked	DDX3X	DDX3X	DDX3X	-0.018	0.856	-0.057	0.517	-0.034	0.747	Cytoplasm	enzyme	diagnosis
DECR1	2,4-dienoyl-CoA reductase 1	DECR1	DECR1	DECR1	-0.073	0.704	-0.057	0.772	-0.08	0.742	Cytoplasm	enzyme	unspecified application
DEF6	DEF6 guanine nucleotide exchange factor	DEF6	DEF6	DEF6	0.259	0.665	0.083	0.795	0.038	0.949	Extracellular Space	other
DEFA1 (includes others)	defensin alpha 1	DEFA1	DEFA1	DEFA1	-1.82	0.0831	-0.768	0.436	-1.996	0.163	Cytoplasm	other
DEK	DEK proto-oncogene	DEK	DEK	DEK	-0.153	0.0759	-0.122	0.498	-0.096	0.496	Nucleus	transcription regulator
DENR	density regulated re-initiation and release factor	DENR	DENR	DENR	-0.106	0.766	0.037	0.884	-0.249	0.385	Other	other
DERA	deoxyribose-phosphate aldolase	DERA	DERA	DERA	-0.328	0.393	-0.156	0.494	-0.173	0.685	Cytoplasm	enzyme
DES	desmin	DES	DES	DES	0.215	0.787	-0.086	0.941	0.09	0.942	Cytoplasm	other	unspecified application
DGLUCY	D-glutamate cyclase	C14orf159	C14orf159	C14orf159	0.067	0.75	0.504	0.256	0.169	0.568	Cytoplasm	enzyme
DHRS7	dehydrogenase/reductase 7	DHRS7	DHRS7	DHRS7	-0.292	0.304	0.072	0.843	0.149	0.109	Other	enzyme
DHX9	DExH-box helicase 9	DHX9	DHX9	DHX9	-0.067	0.713	0.018	0.902	0.004	0.975	Nucleus	enzyme
DHX15	DEAH-box helicase 15	DHX15	DHX15	DHX15	-0.174	0.321	-0.118	0.374	-0.069	0.671	Nucleus	enzyme
DIABLO	diablo IAP-binding mitochondrial protein	DIABLO	DIABLO	DIABLO	-0.01	0.934	0.192	0.00458	0.127	0.284	Cytoplasm	other
DIAPH1	diaphanous related formin 1	DIAPH1	DIAPH1	DIAPH1	0.018	0.905	0.195	0.242	-0.043	0.658	Plasma Membrane	other
DIAPH2	diaphanous related formin 2	DIAPH2	DIAPH2	DIAPH2	-0.107		0.418		0.112		Cytoplasm	other
DKC1	dyskerin pseudouridine synthase 1	DKC1	DKC1	DKC1	-0.048	0.726	0.371	0.102	0.075	0.505	Nucleus	enzyme
DLAT	dihydrolipoamide S-acetyltransferase	DLAT	DLAT	DLAT	-0.135	0.167	-0.086	0.765	0	0.999	Cytoplasm	enzyme
DLD	dihydrolipoamide dehydrogenase	DLD	DLD	DLD	-0.082	0.292	0.063	0.663	0.099	0.616	Cytoplasm	enzyme		hexachlorophene
DLG1	discs large MAGUK scaffold protein 1	DLG1	DLG1	DLG1	0.278	0.297	0.121	0.692	-0.009	0.947	Plasma Membrane	kinase
DLST	dihydrolipoamide S-succinyltransferase	DLST	DLST	DLST	-0.096	0.538	0.151	0.304	-0.023	0.828	Cytoplasm	enzyme
DMD	dystrophin	DMD	DMD	DMD	-0.395	0.753	0.844	0.514	0.189	0.919	Plasma Membrane	other		golodirsen
DNAJA1	DnaJ heat shock protein family (Hsp40) member A1	DNAJA1	DNAJA1	DNAJA1	-0.001	0.993	0.132	0.668	0.214	0.198	Nucleus	other
DNAJA2	DnaJ heat shock protein family (Hsp40) member A2	DNAJA2	DNAJA2	DNAJA2	-0.079	0.453	-0.175	0.123	-0.155	0.189	Nucleus	enzyme
DNAJB1	DnaJ heat shock protein family (Hsp40) member B1	DNAJB1	DNAJB1	DNAJB1	-0.045	0.743	-0.041	0.603	-0.119	0.58	Nucleus	transcription regulator
DNAJB11	DnaJ heat shock protein family (Hsp40) member B11	DNAJB11	DNAJB11	DNAJB11	-0.131	0.663	-0.024	0.91	-0.054	0.863	Cytoplasm	other
DNAJC3	DnaJ heat shock protein family (Hsp40) member C3	DNAJC3	DNAJC3	DNAJC3	0.125	0.773	-0.073	0.884	-0.23	0.714	Cytoplasm	other
DNAJC8	DnaJ heat shock protein family (Hsp40) member C8	DNAJC8	DNAJC8	DNAJC8	-0.234	0.244	-0.026	0.924	-0.129	0.661	Nucleus	other
DNAJC9	DnaJ heat shock protein family (Hsp40) member C9	DNAJC9	DNAJC9	DNAJC9	0.021	0.828	0.347	0.397	0.203	0.459	Nucleus	other
DNAJC13	DnaJ heat shock protein family (Hsp40) member C13	DNAJC13	DNAJC13	DNAJC13	0.018	0.948	-0.011	0.98	-0.001	0.994	Cytoplasm	other
DNM1	dynamin 1	DNM1	DNM1	DNM1	0.065	0.153	0.26	0.0674	0.126	0.231	Cytoplasm	enzyme
DNM2	dynamin 2	DNM2	DNM2	DNM2	-0.087	0.47	-0.009	0.939	0.062	0.593	Plasma Membrane	enzyme
DNM1L	dynamin 1 like	DNM1L	DNM1L	DNM1L	-0.107	0.00503	0.141	0.353	0.013	0.916	Cytoplasm	enzyme
DNPEP	aspartyl aminopeptidase	DNPEP	DNPEP	DNPEP	0.003	0.966	0.051	0.625	-0.006	0.923	Cytoplasm	peptidase
DPP3	dipeptidyl peptidase 3	DPP3	DPP3	DPP3	-0.307	0.444	-0.144	0.465	-0.369	0.0131	Cytoplasm	peptidase
DPT	dermatopontin	DPT	DPT	DPT	0.346	0.142	0.112	0.747	0.193	0.265	Extracellular Space	other
DPYSL2	dihydropyrimidinase like 2	DPYSL2	DPYSL2	DPYSL2	-0.186	0.0599	0.037	0.777	0.079	0.272	Cytoplasm	enzyme
DPYSL3	dihydropyrimidinase like 3	DPYSL3	DPYSL3	DPYSL3	0.009	0.942	0.136	0.587	0.255	0.313	Cytoplasm	enzyme	unspecified application
DRG1	developmentally regulated GTP binding protein 1	DRG1	DRG1	DRG1	0.123	0.475	-0.037	0.894	-0.174	0.401	Cytoplasm	enzyme
DRG2	developmentally regulated GTP binding protein 2	DRG2	DRG2	DRG2	-0.259	0.512	-0.174	0.442	-0.068	0.788	Cytoplasm	enzyme
DSC2	desmocollin 2	DSC2	DSC2	DSC2	0.054	0.928	0.057	0.919	-0.048	0.933	Plasma Membrane	other	unspecified application
DSC3	desmocollin 3	DSC3	DSC3	DSC3	-0.025	0.934	-0.334	0.691	-0.269	0.506	Plasma Membrane	other
DSG1	desmoglein 1	DSG1	DSG1	DSG1	0.619	0.152	0.523	0.114	0.334	0.128	Plasma Membrane	other
DSG3	desmoglein 3	DSG3	DSG3	DSG3	-0.22	0.778	-0.401	0.276	-0.805	0.36	Plasma Membrane	other	unspecified application
DSP	desmoplakin	DSP	DSP	DSP	-0.136	0.829	-0.058	0.9	-0.261	0.669	Plasma Membrane	other
DST	dystonin	DST	DST	DST	0.126	0.732	0.092	0.84	0.142	0.718	Plasma Membrane	other	unspecified application
DSTN	destrin, actin depolymerizing factor	DSTN	DSTN	DSTN	0.026	0.805	-0.162	0.395	0.042	0.763	Cytoplasm	other
DUSP3	dual specificity phosphatase 3	DUSP3	DUSP3	DUSP3	0.118	0.373	0.332	0.213	0.244	0.41	Cytoplasm	phosphatase
DUT	deoxyuridine triphosphatase	DUT	DUT	DUT	-0.139	0.253	-0.426	0.233	-0.156	0.742	Nucleus	enzyme		TAS-114
DYNC1H1	dynein cytoplasmic 1 heavy chain 1	DYNC1H1	DYNC1H1	DYNC1H1	-0.059	0.717	0.155	0.417	0.03	0.714	Cytoplasm	peptidase
DYNC1I2	dynein cytoplasmic 1 intermediate chain 2	DYNC1I2	DYNC1I2	DYNC1I2	0.15	0.00651	0.365	0.173	0.315	0.15	Cytoplasm	other
DYNC1LI2	dynein cytoplasmic 1 light intermediate chain 2	DYNC1LI2	DYNC1LI2	DYNC1LI2	-0.107	0.503	0.087	0.394	-0.057	0.719	Cytoplasm	other
DYNLL2	dynein light chain LC8-type 2	DYNLL2	DYNLL2	DYNLL2	0.004	0.982	0.216	0.493	0.169	0.227	Cytoplasm	other
DYSF	dysferlin	DYSF	DYSF	DYSF	-0.177	0.779	0.837		0.595		Plasma Membrane	other
ECH1	enoyl-CoA hydratase 1	ECH1	ECH1	ECH1	-0.023	0.849	0.01	0.927	0.05	0.719	Cytoplasm	enzyme
ECHDC3	enoyl-CoA hydratase domain containing 3	ECHDC3	ECHDC3	ECHDC3	0.033	0.88	0.295	0.0503	-0.127	0.489	Cytoplasm	enzyme
ECHS1	enoyl-CoA hydratase, short chain 1	ECHS1	ECHS1	ECHS1	-0.267	0.367	-0.39	0.264	-0.306	0.372	Cytoplasm	enzyme
ECI1	enoyl-CoA delta isomerase 1	ECI1	ECI1	ECI1	-0.145	0.452	-0.029	0.814	-0.027	0.883	Cytoplasm	enzyme
ECI2	enoyl-CoA delta isomerase 2	ECI2	ECI2	ECI2	0.197	0.719	0.506	0.42	0.39	0.604	Cytoplasm	enzyme
ECM1	extracellular matrix protein 1	ECM1	ECM1	ECM1	0.01	0.986	0.034	0.942	-0.232	0.685	Extracellular Space	transporter	diagnosis
EEA1	early endosome antigen 1	EEA1	EEA1	EEA1	0.016	0.922	0.336	0.13	0.014	0.934	Cytoplasm	other
EEF2	eukaryotic translation elongation factor 2	EEF2	EEF2	EEF2	-0.012	0.92	-0.106	0.468	-0.022	0.891	Cytoplasm	translation regulator		MDNA55
EEF1A1	eukaryotic translation elongation factor 1 alpha 1	EEF1A1	EEF1A1	EEF1A1	-0.115	0.488	-0.216	0.222	-0.137	0.463	Cytoplasm	translation regulator
EEF1B2	eukaryotic translation elongation factor 1 beta 2	EEF1B2	EEF1B2	EEF1B2	-0.126	0.224	-0.2	0.0823	-0.141	0.588	Cytoplasm	translation regulator
EEF1D	eukaryotic translation elongation factor 1 delta	EEF1D	EEF1D	EEF1D	0.034	0.828	0.013	0.914	-0.095	0.706	Cytoplasm	translation regulator
EEF1G	eukaryotic translation elongation factor 1 gamma	EEF1G	EEF1G	EEF1G	-0.03	0.835	-0.186	0.399	-0.064	0.728	Cytoplasm	translation regulator
EEFSEC	eukaryotic elongation factor, selenocysteine-tRNA specific	EEFSEC	EEFSEC	EEFSEC	0.314		0.613		0.211		Cytoplasm	translation regulator
EFEMP1	EGF containing fibulin extracellular matrix protein 1	EFEMP1	EFEMP1	EFEMP1	0.202	0.428	0.583	0.124	0.427	0.179	Extracellular Space	enzyme
EFHD2	EF-hand domain family member D2	EFHD2	EFHD2	EFHD2	-0.151	0.54	-0.074	0.8	-0.086	0.741	Other	other
EFTUD2	elongation factor Tu GTP binding domain containing 2	EFTUD2	EFTUD2	EFTUD2	-0.081	0.558	-0.142	0.401	-0.2	0.182	Nucleus	enzyme
EGFR	epidermal growth factor receptor	EGFR	EGFR	EGFR	-0.049		-0.029		-0.245		Plasma Membrane	kinase	diagnosis,disease progression,efficacy,prognosis,response to therapy,safety,unspecified application	11C-osimertinib,18F-PEG6-IPQA,89Zr-DFO-nimotuzumab,89Zr-panitumumab,ABBV-321,ABT-414,ABY-029,AEE 788,afatinib,afatinib/cetuximab,afatinib/dasatinib,afatinib/osimertinib,afatinib/paclitaxel,AFM24,alflutinib,allitinib,AMG 596,anastrozole/lapatinib,anastrozole/lapatinib/trastuzumab,anti-EGFR antibody,anti-EGFR monoclonal antibody GT-MAB 5.2-GEX,anti-EGFR-IL-dox,AP32788,AVID100,avitinib,AZD3759,BCA10…
EHBP1L1	EH domain binding protein 1 like 1	EHBP1L1	EHBP1L1	EHBP1L1	0.41	0.718	0.71	0.583	-0.146	0.334	Other	other
EHD1	EH domain containing 1	EHD1	EHD1	EHD1	-0.037	0.753	0.06	0.687	0.098	0.539	Cytoplasm	other
EHD2	EH domain containing 2	EHD2	EHD2	EHD2	-0.078	0.457	0.048	0.803	0.009	0.901	Nucleus	other
EHD3	EH domain containing 3	EHD3	EHD3	EHD3	0.137		0.018		0.175		Cytoplasm	other
EHD4	EH domain containing 4	EHD4	EHD4	EHD4	-0.136	0.373	-0.068	0.195	-0.078	0.632	Plasma Membrane	enzyme
EIF1	eukaryotic translation initiation factor 1	EIF1	EIF1	EIF1	-0.132	0.0681	0.278	0.288	0.182	0.45	Cytoplasm	translation regulator
EIF5	eukaryotic translation initiation factor 5	EIF5	EIF5	EIF5	0.132	0.277	0.106	0.288	0.178	0.173	Cytoplasm	translation regulator
EIF6	eukaryotic translation initiation factor 6	EIF6	EIF6	EIF6	0.065	0.197	-0.071	0.674	-0.071	0.526	Cytoplasm	translation regulator
EIF1AX	eukaryotic translation initiation factor 1A X-linked	EIF1AX	EIF1AX	EIF1AX	-0.018	0.847	0.103	0.477	0.108	0.617	Cytoplasm	translation regulator	diagnosis
EIF2B2	eukaryotic translation initiation factor 2B subunit beta	EIF2B2	EIF2B2	EIF2B2	-0.252	0.136	-0.135	0.579	-0.217	0.0978	Cytoplasm	other
EIF2S1	eukaryotic translation initiation factor 2 subunit alpha	EIF2S1	EIF2S1	EIF2S1	-0.175	0.247	-0.103	0.342	-0.058	0.704	Cytoplasm	translation regulator	efficacy
EIF2S2	eukaryotic translation initiation factor 2 subunit beta	EIF2S2	EIF2S2	EIF2S2	0.149	0.618	0.056	0.913	0.091	0.262	Cytoplasm	translation regulator
EIF2S3	eukaryotic translation initiation factor 2 subunit gamma	EIF2S3	EIF2S3	EIF2S3	-0.284	0.000716	-0.404	0.0666	-0.219	0.436	Cytoplasm	translation regulator
EIF3A	eukaryotic translation initiation factor 3 subunit A	EIF3A	EIF3A	EIF3A	-0.061	0.384	0.043	0.715	-0.056	0.48	Cytoplasm	other
EIF3B	eukaryotic translation initiation factor 3 subunit B	EIF3B	EIF3B	EIF3B	0.013	0.888	0.121	0.308	0.014	0.877	Cytoplasm	translation regulator
EIF3C	eukaryotic translation initiation factor 3 subunit C	EIF3C	EIF3C	EIF3C	0.015	0.861	0.143	0.244	-0.019	0.822	Cytoplasm	translation regulator	unspecified application
EIF3D	eukaryotic translation initiation factor 3 subunit D	EIF3D	EIF3D	EIF3D	-0.036	0.671	-0.04	0.691	-0.09	0.145	Cytoplasm	other
EIF3E	eukaryotic translation initiation factor 3 subunit E	EIF3E	EIF3E	EIF3E	-0.081	0.466	0.061	0.62	-0.16	0.316	Cytoplasm	other
EIF3F	eukaryotic translation initiation factor 3 subunit F	EIF3F	EIF3F	EIF3F	-0.199	0.359	-0.216	0.371	-0.239	0.409	Cytoplasm	translation regulator
EIF3G	eukaryotic translation initiation factor 3 subunit G	EIF3G	EIF3G	EIF3G	0.057	0.286	0.187	0.0726	0.037	0.515	Cytoplasm	other
EIF3H	eukaryotic translation initiation factor 3 subunit H	EIF3H	EIF3H	EIF3H	-0.03	0.858	0.342	0.358	0.112	0.593	Cytoplasm	enzyme
EIF3I	eukaryotic translation initiation factor 3 subunit I	EIF3I	EIF3I	EIF3I	-0.141	0.26	0.014	0.87	-0.224	0.108	Cytoplasm	translation regulator
EIF3J	eukaryotic translation initiation factor 3 subunit J	EIF3J	EIF3J	EIF3J	0.201	0.297	0.274	0.193	0.173	0.454	Cytoplasm	translation regulator
EIF3K	eukaryotic translation initiation factor 3 subunit K	EIF3K	EIF3K	EIF3K	-0.067	0.445	0.079	0.429	0.16	0.086	Cytoplasm	translation regulator
EIF3L	eukaryotic translation initiation factor 3 subunit L	EIF3L	EIF3L	EIF3L	-0.116	0.405	0.15	0.367	-0.074	0.351	Cytoplasm	other
EIF3M	eukaryotic translation initiation factor 3 subunit M	EIF3M	EIF3M	EIF3M	0.011	0.9	0.137	0.51	0.1	0.581	Cytoplasm	other
EIF4A1	eukaryotic translation initiation factor 4A1	EIF4A1	EIF4A1	EIF4A1	0.009	0.918	-0.052	0.686	-0.056	0.537	Cytoplasm	translation regulator
EIF4A2	eukaryotic translation initiation factor 4A2	EIF4A2	EIF4A2	EIF4A2	-0.019	0.871	-0.111	0.517	0.07	0.672	Cytoplasm	translation regulator
EIF4A3	eukaryotic translation initiation factor 4A3	EIF4A3	EIF4A3	EIF4A3	-0.141	0.105	-0.053	0.695	-0.118	0.369	Nucleus	enzyme
EIF4B	eukaryotic translation initiation factor 4B	EIF4B	EIF4B	EIF4B	0.099	0.334	0.232	0.242	0.169	0.237	Cytoplasm	translation regulator	unspecified application
EIF4E	eukaryotic translation initiation factor 4E	EIF4E	EIF4E	EIF4E	-0.029	0.745	-0.021	0.838	0.111	0.239	Cytoplasm	translation regulator	prognosis	ISIS 183750
EIF4G1	eukaryotic translation initiation factor 4 gamma 1	EIF4G1	EIF4G1	EIF4G1	-0.037	0.753	0.199	0.361	0.133	0.398	Cytoplasm	translation regulator
EIF4G2	eukaryotic translation initiation factor 4 gamma 2	EIF4G2	EIF4G2	EIF4G2	0.087	0.636	0.082	0.686	0.127	0.204	Cytoplasm	translation regulator
EIF4H	eukaryotic translation initiation factor 4H	EIF4H	EIF4H	EIF4H	0.066	0.56	0.096	0.181	0.134	0.119	Cytoplasm	translation regulator
EIF5A	eukaryotic translation initiation factor 5A	EIF5A	EIF5A	EIF5A	-0.032	0.873	-0.275	0.321	-0.139	0.494	Cytoplasm	translation regulator		SNS01-T nanoparticles
EIF5B	eukaryotic translation initiation factor 5B	EIF5B	EIF5B	EIF5B	-0.019	0.937	0.363	0.363	0.069	0.673	Cytoplasm	translation regulator
ELAVL1	ELAV like RNA binding protein 1	ELAVL1	ELAVL1	ELAVL1	0.043	0.782	0.151	0.407	0.064	0.729	Cytoplasm	other	efficacy
ELMO1	engulfment and cell motility 1	ELMO1	ELMO1	ELMO1	-0.052		0.7		0.319		Cytoplasm	other
ELMO2	engulfment and cell motility 2	ELMO2	ELMO2	ELMO2	0.37				0.09		Cytoplasm	other
ELOB	elongin B	TCEB2	TCEB2	TCEB2	0.165	0.412	0.081	0.628	-0.096	0.367	Nucleus	transcription regulator
EMC2	ER membrane protein complex subunit 2	EMC2	EMC2	EMC2	0.179	0.194	-0.093	0.931	0.083	0.165	Nucleus	other
EMD	emerin	EMD	EMD	EMD	-0.062	0.612	0.114	0.649	0.051	0.155	Nucleus	other
EMILIN1	elastin microfibril interfacer 1	EMILIN1	EMILIN1	EMILIN1	0.031	0.801	0.174	0.339	0.208	0.311	Extracellular Space	other
EMILIN2	elastin microfibril interfacer 2	EMILIN2	EMILIN2	EMILIN2	-0.045	0.702	0.254	0.0743	0.393	0.17	Extracellular Space	other
EMILIN3	elastin microfibril interfacer 3	EMILIN3	EMILIN3	EMILIN3	0.125	0.698	0.052	0.834	0.064	0.879	Extracellular Space	other
EML4	EMAP like 4	EML4	EML4	EML4	0.03	0.894	0.162	0.474	0.313	0.126	Cytoplasm	other
ENDOD1	endonuclease domain containing 1	ENDOD1	ENDOD1	ENDOD1	-0.17	0.547	-0.266	0.533	-0.18	0.423	Extracellular Space	enzyme
ENO1	enolase 1	ENO1	ENO1	ENO1	-0.092	0.476	-0.121	0.589	-0.165	0.45	Cytoplasm	enzyme	diagnosis
ENO2	enolase 2	ENO2	ENO2	ENO2	-0.117	0.527	-0.007	0.952	0.096	0.7	Cytoplasm	enzyme	diagnosis,efficacy,prognosis,unspecified application
ENOPH1	enolase-phosphatase 1	ENOPH1	ENOPH1	ENOPH1	-0.029	0.889	0.127	0.322	-0.019	0.881	Cytoplasm	enzyme
ENPP1	ectonucleotide pyrophosphatase/phosphodiesterase 1	ENPP1	ENPP1	ENPP1	0.831		0.234		0.58		Plasma Membrane	enzyme
ENTPD1	ectonucleoside triphosphate diphosphohydrolase 1	ENTPD1	ENTPD1	ENTPD1	-0.224	0.711	0.192	0.764	0.005	0.987	Plasma Membrane	enzyme		IPH5201,TTX-030
EPB41L1	erythrocyte membrane protein band 4.1 like 1	EPB41L1	EPB41L1	EPB41L1	-0.065	0.75	-0.217	0.228	0.065	0.687	Plasma Membrane	other
EPB41L2	erythrocyte membrane protein band 4.1 like 2	EPB41L2	EPB41L2	EPB41L2	-0.048	0.71	0.226	0.196	-0.009	0.951	Plasma Membrane	other
EPB41L3	erythrocyte membrane protein band 4.1 like 3	EPB41L3	EPB41L3	EPB41L3	-0.1	0.757	0.136	0.568	0.182	0.516	Plasma Membrane	other
EPCAM	epithelial cell adhesion molecule	EPCAM	EPCAM	EPCAM	0.081	0.606	0.252	0.291	0.194	0.422	Plasma Membrane	other	unspecified application	adecatumumab,catumaxomab,edrecolomab,M701,monoclonal antibody 3622W94,solitomab,tucotuzumab celmoleukin,vicinium
EPHX1	epoxide hydrolase 1	EPHX1	EPHX1	EPHX1	-0.136	0.508	0.174	0.538	0.002	0.982	Cytoplasm	peptidase	diagnosis
EPHX2	epoxide hydrolase 2	EPHX2	EPHX2	EPHX2	0.006	0.946	0.418	0.382	0.126	0.702	Cytoplasm	enzyme	unspecified application
EPPK1	epiplakin 1	EPPK1	EPPK1	EPPK1	-0.598	0.335	-0.817	0.115	-0.936	0.231	Cytoplasm	other
EPRS1	glutamyl-prolyl-tRNA synthetase 1	EPRS	EPRS	EPRS	0.021	0.867	0.021	0.914	-0.151	0.373	Cytoplasm	enzyme
EPS8	epidermal growth factor receptor pathway substrate 8	EPS8	EPS8	EPS8	0.026	0.922	0.436	0.372	0.34	0.246	Plasma Membrane	peptidase
EPS15L1	epidermal growth factor receptor pathway substrate 15 like 1	EPS15L1	EPS15L1	EPS15L1	0.044	0.874	0.029	0.798	-0.097	0.504	Plasma Membrane	other
ERAP1	endoplasmic reticulum aminopeptidase 1	ERAP1	ERAP1	ERAP1	-0.157	0.237	0.036	0.785	0.065	0.635	Extracellular Space	peptidase
ERAP2	endoplasmic reticulum aminopeptidase 2	ERAP2	ERAP2	ERAP2	-0.608	0.42	0.176	0.608	-0.192	0.693	Cytoplasm	peptidase
ERGIC1	endoplasmic reticulum-golgi intermediate compartment 1	ERGIC1	ERGIC1	ERGIC1	0.017	0.833	0.253	0.589	0.001	0.997	Cytoplasm	other
ERLIN1	ER lipid raft associated 1	ERLIN1	ERLIN1	ERLIN1	0.03	0.895	0.025	0.92	-0.16	0.576	Plasma Membrane	other
ERLIN2	ER lipid raft associated 2	ERLIN2	ERLIN2	ERLIN2	-0.004	0.965	0.203	0.199	-0.04	0.787	Cytoplasm	other
ERO1A	endoplasmic reticulum oxidoreductase 1 alpha	ERO1L	ERO1L	ERO1L	-0.009	0.979	-0.133	0.687	-0.17	0.668	Cytoplasm	enzyme
ERP29	endoplasmic reticulum protein 29	ERP29	ERP29	ERP29	-0.043	0.483	0.018	0.956	0.114	0.258	Cytoplasm	transporter
ERP44	endoplasmic reticulum protein 44	ERP44	ERP44	ERP44	-0.001	0.996	0.011	0.942	0.094	0.64	Cytoplasm	enzyme
ESD	esterase D	ESD	ESD	ESD	-0.024	0.655	0.077	0.676	0.072	0.575	Cytoplasm	enzyme
ESYT1	extended synaptotagmin 1	ESYT1	ESYT1	ESYT1	-0.295	0.13	0.072	0.664	-0.082	0.492	Cytoplasm	other
ESYT2	extended synaptotagmin 2	ESYT2	ESYT2	ESYT2	-0.021	0.913	0.22	0.311	-0.02	0.943	Plasma Membrane	other
ETFA	electron transfer flavoprotein subunit alpha	ETFA	ETFA	ETFA	-0.142	0.055	0.075	0.626	-0.018	0.893	Cytoplasm	transporter
ETFB	electron transfer flavoprotein subunit beta	ETFB	ETFB	ETFB	-0.055	0.549	-0.111	0.329	-0.087	0.345	Cytoplasm	transporter	unspecified application
ETHE1	ETHE1 persulfide dioxygenase	ETHE1	ETHE1	ETHE1	-0.093	0.724	-0.073	0.641	-0.16	0.607	Cytoplasm	enzyme
EVPL	envoplakin	EVPL	EVPL	EVPL	-0.505	0.619	-0.359	0.603	-0.747	0.499	Plasma Membrane	other
EWSR1	EWS RNA binding protein 1	EWSR1	EWSR1	EWSR1	-0.271	0.206	-0.023	0.942	0.087	0.714	Nucleus	other
EXOC4	exocyst complex component 4	EXOC4	EXOC4	EXOC4	-0.015		0.25		0.293		Cytoplasm	transporter
EXOC8	exocyst complex component 8	EXOC8	EXOC8	EXOC8	-0.113	0.82	0.431	0.261	-0.193	0.26	Plasma Membrane	other
EXOC6B	exocyst complex component 6B	EXOC6B	EXOC6B	EXOC6B	-0.092	0.65	-0.135	0.51	-0.042	0.675	Other	other	unspecified application
EZR	ezrin	EZR	EZR	EZR	0.017	0.902	0.049	0.836	-0.038	0.85	Plasma Membrane	other	prognosis
F2	coagulation factor II, thrombin	F2	F2	F2	0.062	0.582	-0.049	0.895	0.089	0.617	Extracellular Space	peptidase	diagnosis,unspecified application	argatroban,aspirin/bivalirudin,aspirin/dabigatran etexilate,bivalirudin,dabigatran,dabigatran etexilate,desirudin,efegatran,enoxaparin,lepirudin,thrombin inhibitor,ulinastatin,ximelagatran
F13A1	coagulation factor XIII A chain	F13A1	F13A1	F13A1	-0.196	0.547	-0.158	0.49	-0.301	0.438	Extracellular Space	enzyme
FABP4	fatty acid binding protein 4	FABP4	FABP4	FABP4	-0.432	0.556	-0.312	0.644	-0.189	0.794	Cytoplasm	transporter	disease progression
FABP5	fatty acid binding protein 5	FABP5	FABP5	FABP5	-0.152	0.83	-0.284	0.641	-0.681	0.322	Cytoplasm	transporter	disease progression
FAF2	Fas associated factor family member 2	FAF2	FAF2	FAF2	0.168	0.382	0.375	0.65	0.087	0.883	Cytoplasm	other
FAH	fumarylacetoacetate hydrolase	FAH	FAH	FAH	0.112	0.706	0.075	0.696	-0.109	0.731	Cytoplasm	enzyme
FAHD2A	fumarylacetoacetate hydrolase domain containing 2A	FAHD2A	FAHD2A	FAHD2A	-0.169	0.222	-0.136	0.583	-0.264	0.528	Other	enzyme
FAM114A1	family with sequence similarity 114 member A1	FAM114A1	FAM114A1	FAM114A1	0.156	0.357	-0.045	0.656	0.148	0.401	Extracellular Space	other
FAM114A2	family with sequence similarity 114 member A2	FAM114A2	FAM114A2	FAM114A2	-0.18	0.00528	-0.287	0.456	-0.096	0.58	Other	other
FAM120A	family with sequence similarity 120A	FAM120A	FAM120A	FAM120A	0.18	0.443	-0.091	0.602	0.194	0.226	Cytoplasm	other
FAM25A (includes others)	family with sequence similarity 25 member A	FAM25A	FAM25A	FAM25A	0.91	0.0641	0.787	0.0925	-0.122	0.897	Other	other
FAM83H	family with sequence similarity 83 member H	FAM83H	FAM83H	FAM83H	0.439	0.0556	0.123	0.535	0.009	0.968	Cytoplasm	other
FAM98B	family with sequence similarity 98 member B	FAM98B	FAM98B	FAM98B	0.115	0.861	-0.148	0.857	-0.1	0.838	Nucleus	enzyme
FARP1	FERM, ARH/RhoGEF and pleckstrin domain protein 1	FARP1	FARP1	FARP1	1.48		0.761		1.554		Plasma Membrane	other
FARSA	phenylalanyl-tRNA synthetase subunit alpha	FARSA	FARSA	FARSA	-0.042	0.594	0.159	0.0571	0.077	0.35	Cytoplasm	enzyme
FARSB	phenylalanyl-tRNA synthetase subunit beta	FARSB	FARSB	FARSB	-0.123	0.299	-0.15	0.208	-0.035	0.325	Cytoplasm	enzyme
FASN	fatty acid synthase	FASN	FASN	FASN	-0.013	0.918	0.175	0.0429	0.021	0.832	Cytoplasm	enzyme	diagnosis,efficacy	3-V bioscience-2640,acarbose/orlistat,cerulenin,orlistat,TVB-2640
FBL	fibrillarin	FBL	FBL	FBL	-0.159	0.281	-0.138	0.433	-0.24	0.141	Nucleus	enzyme
FBLN1	fibulin 1	FBLN1	FBLN1	FBLN1	0.052	0.838	0.225	0.442	0.286	0.367	Extracellular Space	other	unspecified application
FBLN2	fibulin 2	FBLN2	FBLN2	FBLN2	0.118	0.58	0.316	0.0581	0.137	0.511	Extracellular Space	other
FBLN5	fibulin 5	FBLN5	FBLN5	FBLN5	0.143	0.569	0.189	0.274	0.344	0.247	Extracellular Space	other
FBN1	fibrillin 1	FBN1	FBN1	FBN1	-0.125	0.663	0.508	0.0757	0.111	0.353	Extracellular Space	other
FBN2	fibrillin 2	FBN2	FBN2	FBN2	0.18		0.413		0.311		Extracellular Space	other
FBP1	fructose-bisphosphatase 1	FBP1	FBP1	FBP1	0.009	0.896	0.15	0.325	-0.308	0.456	Cytoplasm	phosphatase
FCGBP	Fc fragment of IgG binding protein	FCGBP	FCGBP	FCGBP	-0.921	0.0711	-0.6	0.343	-0.93	0.238	Extracellular Space	other
FDPS	farnesyl diphosphate synthase	FDPS	FDPS	FDPS	0.005	0.953	-0.031	0.79	-0.004	0.941	Cytoplasm	enzyme		alendronate/cholecalciferol,alendronic acid,ibandronic acid,minodronate,pamidronic acid,risedronic acid,zoledronic acid
FERMT2	fermitin family member 2	FERMT2	FERMT2	FERMT2	-0.124	0.511	0.077	0.837	0.167	0.507	Cytoplasm	other	disease progression
FGA	fibrinogen alpha chain	FGA	FGA	FGA	0.297	0.0413	0.357	0.33	0.379	0.114	Extracellular Space	other	diagnosis,unspecified application	F2
FGB	fibrinogen beta chain	FGB	FGB	FGB	0.083	0.573	0.084	0.774	0.239	0.213	Extracellular Space	other	unspecified application	F2
FGG	fibrinogen gamma chain	FGG	FGG	FGG	0.261	0.103	0.21	0.519	0.294	0.0837	Extracellular Space	other		F2
FH	fumarate hydratase	FH	FH	FH	-0.093	0.491	-0.065	0.424	-0.027	0.713	Cytoplasm	enzyme
FHL1	four and a half LIM domains 1	FHL1	FHL1	FHL1	0.207	0.488	0.404	0.415	0.355	0.438	Cytoplasm	other
FHL2	four and a half LIM domains 2	FHL2	FHL2	FHL2	-0.113	0.606	0.08	0.788	0.08	0.826	Nucleus	transcription regulator
FKBP2	FKBP prolyl isomerase 2	FKBP2	FKBP2	FKBP2	-0.034	0.815	0.107	0.529	0.072	0.695	Cytoplasm	enzyme
FKBP3	FKBP prolyl isomerase 3	FKBP3	FKBP3	FKBP3	0.008	0.955	0.165	0.332	0.104	0.463	Nucleus	enzyme
FKBP4	FKBP prolyl isomerase 4	FKBP4	FKBP4	FKBP4	-0.031	0.651	0.261	0.201	0.093	0.609	Nucleus	enzyme
FKBP7	FKBP prolyl isomerase 7	FKBP7	FKBP7	FKBP7	-0.073	0.573	0.167	0.491	0.2	0.276	Cytoplasm	enzyme
FKBP9	FKBP prolyl isomerase 9	FKBP9	FKBP9	FKBP9	0.164	0.738	0.14	0.248	0.186	0.285	Cytoplasm	enzyme
FKBP10	FKBP prolyl isomerase 10	FKBP10	FKBP10	FKBP10	-0.047	0.806	0.286	0.666	0.037	0.934	Cytoplasm	enzyme
FKBP1A	FKBP prolyl isomerase 1A	FKBP1A	FKBP1A	FKBP1A	-0.023	0.868	0.204	0.39	0.083	0.415	Cytoplasm	enzyme	unspecified application	cyclosporine A/sirolimus/tacrolimus,cyclosporine A/tacrolimus,everolimus,everolimus/exemestane,everolimus/fulvestrant,everolimus/gefitinib,everolimus/lenvatinib,everolimus/letrozole,everolimus/paclitaxel,everolimus/panobinostat,everolimus/pasireotide,everolimus/ribociclib,everolimus/sorafenib,everolimus/tamoxifen,everolimus/vandetanib,imatinib/sirolimus,lenalidomide/temsirolimus,methotrexate/siro…
FLG	filaggrin	FLG	FLG	FLG	1.151	0.328	0.009	0.961	0.185	0.774	Cytoplasm	other
FLII	FLII actin remodeling protein	FLII	FLII	FLII	0.289	0.14	0.173	0.385	-0.177	0.179	Nucleus	other
FLNA	filamin A	FLNA	FLNA	FLNA	-0.083	0.791	0.036	0.94	0.236	0.621	Cytoplasm	other	unspecified application
FLNB	filamin B	FLNB	FLNB	FLNB	-0.109	0.504	-0.07	0.742	-0.18	0.388	Cytoplasm	other	unspecified application
FLNC	filamin C	FLNC	FLNC	FLNC	-0.018	0.951	0.262	0.557	0.244	0.606	Cytoplasm	other	diagnosis
FLOT1	flotillin 1	FLOT1	FLOT1	FLOT1	0.019	0.883	0.067	0.372	0.147	0.0024	Plasma Membrane	other
FLOT2	flotillin 2	FLOT2	FLOT2	FLOT2	-0.191	0.259	0.221	0.246	0.033	0.83	Plasma Membrane	other
FMOD	fibromodulin	FMOD	FMOD	FMOD	0.207	0.558	0.379	0.529	0.494	0.366	Extracellular Space	other
FN1	fibronectin 1	FN1	FN1	FN1	-0.023	0.901	0.125	0.323	0.198	0.235	Extracellular Space	enzyme	diagnosis,efficacy,prognosis,unspecified application	AS1409,bifikafusp alfa,iodine I 131 anti-fibronectin antibody fragment L19-SIP,L19-IL2 monoclonal antibody-cytokine fusion protein/L19TNFalpha,L19TNFalpha,ocriplasmin
FN3KRP	fructosamine 3 kinase related protein	FN3KRP	FN3KRP	FN3KRP	0.079	0.464	0.167	0.282	0.08	0.481	Cytoplasm	kinase
FOLR1	folate receptor alpha	FOLR1	FOLR1	FOLR1	-1.316		-0.353		-2.337		Plasma Membrane	transporter	diagnosis	farletuzumab,mirvetuximab soravtansine,OTL38
FOSL2	FOS like 2, AP-1 transcription factor subunit	FOSL2	FOSL2	FOSL2	0.253	0.635	0.495	0.359	0.149	0.0204	Nucleus	transcription regulator
FSCN1	fascin actin-bundling protein 1	FSCN1	FSCN1	FSCN1	-0.118	0.568	-0.123	0.35	-0.167	0.41	Cytoplasm	other	unspecified application
FTH1	ferritin heavy chain 1	FTH1	FTH1	FTH1	-0.013	0.966	0.303	0.262	0.124	0.681	Cytoplasm	enzyme	unspecified application
FTL	ferritin light chain	FTL	FTL	FTL	-0.237	0.449	0.218	0.497	-0.276	0.591	Cytoplasm	enzyme	diagnosis,unspecified application
FUBP1	far upstream element binding protein 1	FUBP1	FUBP1	FUBP1	-0.162	0.3	-0.308	0.141	-0.098	0.526	Nucleus	transcription regulator
FUBP3	far upstream element binding protein 3	FUBP3	FUBP3	FUBP3	0.044		0.194		0.213		Nucleus	transcription regulator
FUCA1	alpha-L-fucosidase 1	FUCA1	FUCA1	FUCA1	-0.214	0.0706	-0.006	0.97	-0.32	0.0991	Cytoplasm	enzyme
FUS	FUS RNA binding protein	FUS	FUS	FUS	-0.169	0.125	0.02	0.939	-0.16	0.35	Nucleus	transcription regulator
FYCO1	FYVE and coiled-coil domain autophagy adaptor 1	FYCO1	FYCO1	FYCO1	0.303	0.00669	0.414	0.117	0.345	0.186	Cytoplasm	other
G3BP1	G3BP stress granule assembly factor 1	G3BP1	G3BP1	G3BP1	0.092	0.521	0.102	0.458	0.225	0.234	Nucleus	enzyme
G3BP2	G3BP stress granule assembly factor 2	G3BP2	G3BP2	G3BP2	-0.19	0.254	-0.088	0.664	0.005	0.956	Cytoplasm	enzyme	prognosis
G6PD	glucose-6-phosphate dehydrogenase	G6PD	G6PD	G6PD	-0.044	0.527	0.215	0.43	-0.041	0.751	Cytoplasm	enzyme
GAK	cyclin G associated kinase	GAK	GAK	GAK	-0.009	0.96	0.115	0.533	-0.034	0.745	Nucleus	kinase
GALE	UDP-galactose-4-epimerase	GALE	GALE	GALE	0.29		-0.288		-0.141		Cytoplasm	enzyme
GALK1	galactokinase 1	GALK1	GALK1	GALK1	-0.008	0.926	0.161	0.131	0.052	0.483	Cytoplasm	kinase
GANAB	glucosidase II alpha subunit	GANAB	GANAB	GANAB	-0.004	0.95	0.06	0.351	0.127	0.297	Cytoplasm	enzyme		miglitol
GAPDH	glyceraldehyde-3-phosphate dehydrogenase	GAPDH	GAPDH	GAPDH	-0.156	0.102	-0.095	0.374	-0.118	0.427	Cytoplasm	enzyme	diagnosis,unspecified application
GAR1	GAR1 ribonucleoprotein	GAR1	GAR1	GAR1	-0.144	0.452	0.093	0.759	-0.184	0.0161	Nucleus	other
GARS1	glycyl-tRNA synthetase 1	GARS	GARS	GARS	0.028	0.925	-0.21	0.346	-0.395	0.0472	Cytoplasm	enzyme
GART	phosphoribosylglycinamide formyltransferase, phosphoribosylglycinamide synthetase, phosphoribosylaminoimidazole synthetase	GART	GART	GART	0.25	0.351	0.276	0.336	0.199	0.412	Cytoplasm	enzyme	prognosis,safety	bevacizumab/erlotinib/pemetrexed,bevacizumab/paclitaxel/pemetrexed,bevacizumab/pemetrexed,gemcitabine/pemetrexed,lometrexol,pelitrexol,pembrolizumab/pemetrexed,pemetrexed
GATD3A/GATD3B	glutamine amidotransferase like class 1 domain containing 3A	C21orf33	C21orf33	C21orf33	-0.062	0.475	0.022	0.9	0.019	0.908	Cytoplasm	other
GBE1	1,4-alpha-glucan branching enzyme 1	GBE1	GBE1	GBE1	0.445	0.49	1.293	0.0741	0.849	0.466	Cytoplasm	enzyme
GBP2	guanylate binding protein 2	GBP2	GBP2	GBP2	-0.114	0.654	0.145	0.427	0.039	0.435	Cytoplasm	enzyme
GBP6	guanylate binding protein family member 6	GBP6	GBP6	GBP6	0.746	0.192	0.786	0.0887	0.509	0.0584	Cytoplasm	enzyme
GC	GC vitamin D binding protein	GC	GC	GC	0.15	0.561	0.089	0.813	-0.008	0.972	Extracellular Space	transporter	unspecified application
GCDH	glutaryl-CoA dehydrogenase	GCDH	GCDH	GCDH	-0.042	0.84	0.285	0.274	0.388	0.0331	Cytoplasm	enzyme
GCLC	glutamate-cysteine ligase catalytic subunit	GCLC	GCLC	GCLC	-0.25	0.439	-0.298	0.497	0.118	0.751	Cytoplasm	enzyme
GCN1	GCN1 activator of EIF2AK4	GCN1L1	GCN1L1	GCN1L1	-0.088	0.579	0.156	0.684	0.104	0.454	Cytoplasm	translation regulator
GCSH	glycine cleavage system protein H	GCSH	GCSH	GCSH	0.245	0.325	0.235	0.2	0.329	0.122	Cytoplasm	enzyme
GDI1	GDP dissociation inhibitor 1	GDI1	GDI1	GDI1	0.028	0.713	0.141	0.353	0.104	0.451	Cytoplasm	other
GDI2	GDP dissociation inhibitor 2	GDI2	GDI2	GDI2	-0.117	0.279	-0.156	0.456	-0.144	0.399	Cytoplasm	other
GEMIN5	gem nuclear organelle associated protein 5	GEMIN5	GEMIN5	GEMIN5	-0.317		0.625		0.179		Nucleus	other
GET3	guided entry of tail-anchored proteins factor 3, ATPase	ASNA1	ASNA1	ASNA1	-0.086	0.178	0.07	0.517	-0.036	0.758	Nucleus	transporter
GFPT1	glutamine--fructose-6-phosphate transaminase 1	GFPT1	GFPT1	GFPT1	0.005	0.978	0.048	0.787	-0.105	0.515	Cytoplasm	enzyme
GGCT	gamma-glutamylcyclotransferase	GGCT	GGCT	GGCT	0.068	0.742	0.125	0.213	0.075	0.781	Cytoplasm	enzyme
GGT5	gamma-glutamyltransferase 5	GGT5	GGT5	GGT5	-0.334	0.296	-0.259	0.185	0	0.999	Plasma Membrane	enzyme
GIMAP4	GTPase, IMAP family member 4	GIMAP4	GIMAP4	GIMAP4	-0.04	0.929	0.257	0.622	0.096	0.835	Nucleus	other
GIPC1	GIPC PDZ domain containing family member 1	GIPC1	GIPC1	GIPC1	-0.072	0.859	-0.109	0.795	-0.191	0.76	Cytoplasm	other
GJA1	gap junction protein alpha 1	GJA1	GJA1	GJA1	0.261	0.599	-0.097	0.548	0.403	0.319	Plasma Membrane	transporter
GLG1	golgi glycoprotein 1	GLG1	GLG1	GLG1	0.172	0.0522	0.371	0.0713	0.056	0.632	Cytoplasm	other
GLO1	glyoxalase I	GLO1	GLO1	GLO1	0.002	0.983	-0.004	0.961	-0.011	0.939	Cytoplasm	enzyme
GLOD4	glyoxalase domain containing 4	GLOD4	GLOD4	GLOD4	-0.13	0.0525	0.144	0.363	0.022	0.913	Cytoplasm	enzyme
GLRX3	glutaredoxin 3	GLRX3	GLRX3	GLRX3	0.015	0.946	-0.031	0.893	-0.047	0.728	Cytoplasm	enzyme
GLTP	glycolipid transfer protein	GLTP	GLTP	GLTP	0.031	0.939	-0.027	0.958	-0.393	0.444	Cytoplasm	transporter
GLUD1	glutamate dehydrogenase 1	GLUD1	GLUD1	GLUD1	-0.033	0.822	0.042	0.776	-0.018	0.893	Cytoplasm	enzyme	unspecified application
GLUL	glutamate-ammonia ligase	GLUL	GLUL	GLUL	-1.162	0.609	-1.085	0.591	-0.951	0.687	Cytoplasm	enzyme	unspecified application
GMPPB	GDP-mannose pyrophosphorylase B	GMPPB	GMPPB	GMPPB	-0.226	0.261	-0.424	0.266	-0.27	0.408	Cytoplasm	enzyme
GMPS	guanine monophosphate synthase	GMPS	GMPS	GMPS	0.004	0.975	0.095	0.713	-0.135	0.267	Nucleus	enzyme		glutamine amidotransferase inhibitor
GNA11	G protein subunit alpha 11	GNA11	GNA11	GNA11	0.044	0.658	0.181	0.381	-0.101	0.465	Plasma Membrane	enzyme
GNA13	G protein subunit alpha 13	GNA13	GNA13	GNA13	-0.026	0.696	0.701	0.437	-0.213	0.441	Plasma Membrane	enzyme
GNAI2	G protein subunit alpha i2	GNAI2	GNAI2	GNAI2	-0.004	0.956	0.099	0.149	0.056	0.688	Plasma Membrane	enzyme
GNAI3	G protein subunit alpha i3	GNAI3	GNAI3	GNAI3	-0.004	0.985	0.26	0.375	0.014	0.945	Cytoplasm	enzyme
GNAS	GNAS complex locus	GNAS	GNAS	GNAS	0.004	0.978	0.225	0.405	0.14	0.175	Plasma Membrane	enzyme	unspecified application
GNB1	G protein subunit beta 1	GNB1	GNB1	GNB1	0.024	0.911	-0.017	0.918	0.018	0.907	Plasma Membrane	enzyme
GNB2	G protein subunit beta 2	GNB2	GNB2	GNB2	0.372	0.492	0.203	0.618	0.111	0.273	Plasma Membrane	enzyme
GNG12	G protein subunit gamma 12	GNG12	GNG12	GNG12	0.016	0.942	0.554	0.16	0.447	0.144	Plasma Membrane	enzyme
GNPDA1	glucosamine-6-phosphate deaminase 1	GNPDA1	GNPDA1	GNPDA1	-0.062	0.389	-0.018	0.838	-0.034	0.82	Cytoplasm	enzyme
GNPDA2	glucosamine-6-phosphate deaminase 2	GNPDA2	GNPDA2	GNPDA2	-0.142	0.658	-0.005	0.991	-0.108	0.611	Nucleus	enzyme
GOLGA2	golgin A2	GOLGA2	GOLGA2	GOLGA2	0.087	0.592	-0.362	0.338	-0.084	0.656	Cytoplasm	other
GOLGA3	golgin A3	GOLGA3	GOLGA3	GOLGA3	0.106	0.755	0.019	0.968	0.265	0.0164	Cytoplasm	transporter
GOLGB1	golgin B1	GOLGB1	GOLGB1	GOLGB1	0.255	0.402	0.437	0.136	0.076	0.826	Cytoplasm	other
GOLM1	golgi membrane protein 1	GOLM1	GOLM1	GOLM1	0.263		1.252		0.532		Cytoplasm	other	diagnosis
GOLPH3	golgi phosphoprotein 3	GOLPH3	GOLPH3	GOLPH3	0.083	0.818	0.235	0.131	0.191	0.284	Cytoplasm	other
GOLPH3L	golgi phosphoprotein 3 like	GOLPH3L	GOLPH3L	GOLPH3L	0.352	0.0542	0.636	0.0943	0.302	0.229	Cytoplasm	other
GORASP2	golgi reassembly stacking protein 2	GORASP2	GORASP2	GORASP2	-0.139	0.324	0.018	0.948	-0.237	0.548	Cytoplasm	other
GOT1	glutamic-oxaloacetic transaminase 1	GOT1	GOT1	GOT1	-0.208	0.096	0.05	0.797	-0.035	0.888	Cytoplasm	enzyme
GOT2	glutamic-oxaloacetic transaminase 2	GOT2	GOT2	GOT2	-0.034	0.709	-0.108	0.315	-0.081	0.466	Cytoplasm	enzyme
GPD2	glycerol-3-phosphate dehydrogenase 2	GPD2	GPD2	GPD2	-0.187	0.341	-0.291	0.348	-0.436	0.185	Cytoplasm	enzyme
GPD1L	glycerol-3-phosphate dehydrogenase 1 like	GPD1L	GPD1L	GPD1L	-0.046	0.593	-0.127	0.552	-0.128	0.502	Cytoplasm	enzyme
GPI	glucose-6-phosphate isomerase	GPI	GPI	GPI	-0.139	0.295	-0.082	0.606	-0.05	0.629	Extracellular Space	enzyme	unspecified application
GPNMB	glycoprotein nmb	GPNMB	GPNMB	GPNMB	-0.041	0.865	-0.019	0.845	0.123	0.723	Plasma Membrane	enzyme	unspecified application	glembatumumab,glembatumumab vedotin
GPX1	glutathione peroxidase 1	GPX1	GPX1	GPX1	-0.051	0.742	0.046	0.839	-0.043	0.873	Cytoplasm	enzyme	diagnosis,efficacy
GPX3	glutathione peroxidase 3	GPX3	GPX3	GPX3	-0.05	0.53	0.087	0.538	-0.103	0.0363	Extracellular Space	enzyme	unspecified application
GPX4	glutathione peroxidase 4	GPX4	GPX4	GPX4	-0.021	0.799	-0.025	0.89	-0.076	0.572	Cytoplasm	enzyme
GRB2	growth factor receptor bound protein 2	GRB2	GRB2	GRB2	0.255	0.0303	0.748	0.273	0.278	0.576	Cytoplasm	other		liposome-incorporated Grb2 antisense oligodeoxynucleotide
GRHPR	glyoxylate and hydroxypyruvate reductase	GRHPR	GRHPR	GRHPR	-0.065	0.759	0.148	0.65	-0.056	0.85	Cytoplasm	enzyme
GRIPAP1	GRIP1 associated protein 1	GRIPAP1	GRIPAP1	GRIPAP1	-0.046	0.841	-0.101	0.771	0.029	0.662	Plasma Membrane	other
GRPEL1	GrpE like 1, mitochondrial	GRPEL1	GRPEL1	GRPEL1	-0.093	0.532	0.035	0.85	0.006	0.977	Cytoplasm	other
GSN	gelsolin	GSN	GSN	GSN	-0.042	0.586	-0.076	0.575	-0.07	0.506	Extracellular Space	other	disease progression,efficacy
GSR	glutathione-disulfide reductase	GSR	GSR	GSR	0.033	0.766	0.065	0.666	0.028	0.8	Cytoplasm	enzyme		carmustine,carmustine/prednisone
GSS	glutathione synthetase	GSS	GSS	GSS	0.068	0.0729	0.002	0.983	-0.021	0.704	Cytoplasm	enzyme		N-acetyl-L-cysteine
GSTK1	glutathione S-transferase kappa 1	GSTK1	GSTK1	GSTK1	-0.09	0.48	-0.163	0.606	-0.32	0.351	Cytoplasm	enzyme
GSTM1	glutathione S-transferase mu 1	GSTM1	GSTM1	GSTM1	-0.183		-0.391		-0.21		Cytoplasm	enzyme	diagnosis,efficacy,safety,unspecified application
GSTM2	glutathione S-transferase mu 2	GSTM2	GSTM2	GSTM2	-0.071	0.715	0.036	0.435	-0.097	0.686	Cytoplasm	enzyme	diagnosis,prognosis
GSTM3	glutathione S-transferase mu 3	GSTM3	GSTM3	GSTM3	-0.024	0.765	0.017	0.865	0.047	0.707	Cytoplasm	enzyme	diagnosis,prognosis
GSTM4	glutathione S-transferase mu 4	GSTM4	GSTM4	GSTM4	-0.876		-0.61		-0.305		Cytoplasm	enzyme	prognosis
GSTO1	glutathione S-transferase omega 1	GSTO1	GSTO1	GSTO1	-0.122	0.222	0.069	0.67	-0.123	0.483	Cytoplasm	enzyme	unspecified application
GSTP1	glutathione S-transferase pi 1	GSTP1	GSTP1	GSTP1	-0.142	0.368	-0.119	0.495	-0.059	0.634	Cytoplasm	enzyme	diagnosis,efficacy,prognosis,safety,unspecified application
GSTT1	glutathione S-transferase theta 1	GSTT1	GSTT1	GSTT1	-0.077	0.582	0.019	0.779	-0.121		Cytoplasm	enzyme	diagnosis,efficacy
GTF2I	general transcription factor IIi	GTF2I	GTF2I	GTF2I	-0.034	0.744	0.044	0.789	-0.091	0.4	Nucleus	transcription regulator
GYG1	glycogenin 1	GYG1	GYG1	GYG1	-0.174	0.00256	-0.056	0.56	-0.185	0.105	Cytoplasm	enzyme
H1-0	H1.0 linker histone	H1F0	H1F0	H1F0	0.034	0.886	0.536	0.16	0.528	0.0982	Nucleus	other
H1-2	H1.2 linker histone, cluster member	HIST1H1C	HIST1H1C	HIST1H1C	0.111	0.485	0.871	0.0776	0.68	0.0146	Nucleus	other
H1-3	H1.3 linker histone, cluster member	HIST1H1D	HIST1H1D	HIST1H1D	0.608	0.124	1.27	0.0982	0.839	0.118	Nucleus	other
H1-4	H1.4 linker histone, cluster member	HIST1H1E	HIST1H1E	HIST1H1E	0.141	0.605	0.748	0.168	0.62	0.123	Nucleus	other
H1-5	H1.5 linker histone, cluster member	HIST1H1B	HIST1H1B	HIST1H1B	0.018	0.972	0.345	0.386	0.208	0.688	Nucleus	other
H1-10	H1.10 linker histone	H1FX	H1FX	H1FX	-0.131	0.222	0.443	0.0541	0.329	0.0598	Nucleus	other
H2AX	H2A.X variant histone	H2AFX	H2AFX	H2AFX	0.122	0.48	0.494	0.0489	0.406	0.181	Nucleus	transcription regulator	efficacy
H2AZ2	H2A.Z variant histone 2	H2AFV	H2AFV	H2AFV	-0.288	0.0182	0.165	0.366	0.042	0.755	Nucleus	other
H2BC11	H2B clustered histone 11	HIST1H2BJ	HIST1H2BJ	HIST1H2BJ	0.004		-0.667		-0.464		Nucleus	other
H2BC14	H2B clustered histone 14	HIST1H2BM	HIST1H2BM	HIST1H2BM	-0.113	0.456	0.188	0.491	0.277	0.32	Nucleus	other
H3-4	H3.4 histone	HIST3H3	HIST3H3	HIST3H3	-0.455	0.289	-0.528	0.236	-0.582	0.245	Nucleus	other
H3-3A/H3-3B	H3.3 histone A	H3F3A	H3F3A	H3F3A	-0.343	0.0926	0.381	0.376	0.122	0.199	Nucleus	other	diagnosis
H4C1	H4 clustered histone 1	HIST1H4A	HIST1H4A	HIST1H4A	-0.185	0.255	0.189	0.604	0.199	0.196	Nucleus	other
H6PD	hexose-6-phosphate dehydrogenase/glucose 1-dehydrogenase	H6PD	H6PD	H6PD	-0.062	0.737	0.324	0.249	0.128	0.519	Cytoplasm	enzyme
HAAO	3-hydroxyanthranilate 3,4-dioxygenase	HAAO	HAAO	HAAO	-0.106	0.696	-0.178	0.419	-0.227	0.451	Cytoplasm	enzyme
HACD3	3-hydroxyacyl-CoA dehydratase 3	PTPLAD1	PTPLAD1	PTPLAD1	-0.206	0.551	0.323	0.334	0.168	0.503	Cytoplasm	enzyme
HADH	hydroxyacyl-CoA dehydrogenase	HADH	HADH	HADH	-0.119	0.335	-0.123	0.521	-0.139	0.444	Cytoplasm	enzyme	unspecified application
HADHA	hydroxyacyl-CoA dehydrogenase trifunctional multienzyme complex subunit alpha	HADHA	HADHA	HADHA	-0.077	0.503	-0.061	0.529	-0.008	0.921	Cytoplasm	enzyme	unspecified application
HADHB	hydroxyacyl-CoA dehydrogenase trifunctional multienzyme complex subunit beta	HADHB	HADHB	HADHB	-0.084	0.409	-0.1	0.436	0.025	0.796	Cytoplasm	enzyme	unspecified application
HARS1	histidyl-tRNA synthetase 1	HARS	HARS	HARS	-0.11	0.245	-0.335	0.0598	0.037	0.74	Cytoplasm	enzyme
HBA1/HBA2	hemoglobin subunit alpha 2	HBA1	HBA1	HBA1	-0.085	0.825	0.247	0.484	0.318	0.405	Extracellular Space	transporter	diagnosis,efficacy,response to therapy,safety	donepezil/mefloquine,iron dextran,mefloquine
HBB	hemoglobin subunit beta	HBB	HBB	HBB	0.005	0.99	0.227	0.609	0.265	0.63	Cytoplasm	transporter		iron dextran,voxelotor
HBD	hemoglobin subunit delta	HBD	HBD	HBD	-0.044	0.896	0.209	0.579	0.138	0.769	Other	transporter
HBG1	hemoglobin subunit gamma 1	HBG1	HBG1	HBG1	-0.169	0.631	0.117	0.81	-0.231	0.37	Cytoplasm	other
HCFC1	host cell factor C1	HCFC1	HCFC1	HCFC1	-0.015	0.852	0.065	0.67	0.1	0.58	Nucleus	transcription regulator
HDGF	heparin binding growth factor	HDGF	HDGF	HDGF	-0.132	0.136	-0.066	0.621	-0.076	0.377	Extracellular Space	growth factor
HDGFL2	HDGF like 2	HDGFRP2	HDGFRP2	HDGFRP2	0.067	0.825	0	0.998	-0.015	0.94	Nucleus	other
HDGFL3	HDGF like 3	HDGFRP3	HDGFRP3	HDGFRP3	0.053	0.836	0.367	0.416	0.282	0.596	Nucleus	other
HDHD2	haloacid dehalogenase like hydrolase domain containing 2	HDHD2	HDHD2	HDHD2	0.047	0.641	0	0.998	0.087	0.536	Cytoplasm	other
HDLBP	high density lipoprotein binding protein	HDLBP	HDLBP	HDLBP	-0.087	0.555	0.07	0.526	-0.085	0.47	Nucleus	transporter
HEBP1	heme binding protein 1	HEBP1	HEBP1	HEBP1	0.056	0.186	0.228	0.195	0.029	0.88	Cytoplasm	other
HEBP2	heme binding protein 2	HEBP2	HEBP2	HEBP2	-0.15	0.249	0.058	0.71	0.067	0.517	Cytoplasm	other
HEXA	hexosaminidase subunit alpha	HEXA	HEXA	HEXA	0.045	0.762	0.393	0.358	0.095	0.648	Cytoplasm	enzyme
HEXB	hexosaminidase subunit beta	HEXB	HEXB	HEXB	0.002	0.979	0.128	0.0681	0.069	0.566	Cytoplasm	enzyme
HGS	hepatocyte growth factor-regulated tyrosine kinase substrate	HGS	HGS	HGS	0.122	0.076	0.194	0.0257	0.123	0.24	Cytoplasm	other
HIBADH	3-hydroxyisobutyrate dehydrogenase	HIBADH	HIBADH	HIBADH	0.022	0.73	0.065	0.852	0.013	0.944	Cytoplasm	enzyme
HIBCH	3-hydroxyisobutyryl-CoA hydrolase	HIBCH	HIBCH	HIBCH	0.007	0.938	-0.089	0.46	-0.141	0.198	Cytoplasm	enzyme
HINT1	histidine triad nucleotide binding protein 1	HINT1	HINT1	HINT1	-0.105	0.366	-0.492	0.344	-0.113	0.479	Nucleus	enzyme	prognosis
HINT2	histidine triad nucleotide binding protein 2	HINT2	HINT2	HINT2	-0.179	0.379	-0.195	0.569	-0.184	0.567	Cytoplasm	other
HIP1	huntingtin interacting protein 1	HIP1	HIP1	HIP1	0.006	0.977	0.148	0.547	-0.077	0.793	Cytoplasm	other
HK1	hexokinase 1	HK1	HK1	HK1	-0.065	0.561	0.053	0.476	0.01	0.933	Cytoplasm	kinase
HK2	hexokinase 2	HK2	HK2	HK2	1.217		0.496		0.901		Cytoplasm	kinase
HLA-A	major histocompatibility complex, class I, A	HLA-A	HLA-A	HLA-A	-0.078	0.644	0.175	0.744	0.164	0.61	Plasma Membrane	other	efficacy,response to therapy
HLA-B	major histocompatibility complex, class I, B	HLA-B	HLA-B	HLA-B	-0.326	0.463	0.064	0.87	0.022	0.952	Plasma Membrane	transmembrane receptor	safety
HLA-DRA	major histocompatibility complex, class II, DR alpha	HLA-DRA	HLA-DRA	HLA-DRA	-0.414	0.043	-0.305	0.234	-0.349	0.183	Plasma Membrane	transmembrane receptor	unspecified application
HLA-DRB1	major histocompatibility complex, class II, DR beta 1	HLA-DRB1	HLA-DRB1	HLA-DRB1	-0.15	0.666	-0.026	0.927	-0.03	0.963	Plasma Membrane	transmembrane receptor		apolizumab
HLA-DRB5	major histocompatibility complex, class II, DR beta 5	HLA-DRB5	HLA-DRB5	HLA-DRB5	-0.406	0.502	-0.354	0.452	-0.303	0.519	Plasma Membrane	transmembrane receptor
HLA-E	major histocompatibility complex, class I, E	HLA-E	HLA-E	HLA-E	0.144	0.855	0.441	0.48	0.21	0.757	Plasma Membrane	transmembrane receptor	prognosis
HM13	histocompatibility minor 13	HM13	HM13	HM13	-0.261	0.418	0.116	0.714	-0.114	0.592	Cytoplasm	peptidase
HMGA1	high mobility group AT-hook 1	HMGA1	HMGA1	HMGA1	-0.002	0.988	0.344	0.185	0.158	0.494	Nucleus	transcription regulator	unspecified application
HMGB1	high mobility group box 1	HMGB1	HMGB1	HMGB1	0.007	0.949	0.223	0.116	0.108	0.565	Nucleus	transcription regulator	diagnosis
HMGB2	high mobility group box 2	HMGB2	HMGB2	HMGB2	-0.016	0.931	0.261	0.11	0.134	0.629	Nucleus	transcription regulator	unspecified application
HMGCS1	3-hydroxy-3-methylglutaryl-CoA synthase 1	HMGCS1	HMGCS1	HMGCS1	-0.429		-0.456		-0.513		Cytoplasm	enzyme
HMGN1	high mobility group nucleosome binding domain 1	HMGN1	HMGN1	HMGN1	-0.045	0.234	0.04	0.695	0.001	0.992	Nucleus	transcription regulator	unspecified application
HMGN2	high mobility group nucleosomal binding domain 2	HMGN2	HMGN2	HMGN2	0.039	0.899	0.183	0.639	0.393	0.472	Nucleus	other
HMGN4	high mobility group nucleosomal binding domain 4	HMGN4	HMGN4	HMGN4	0.006	0.962	0.482	0.0256	0.526	0.18	Nucleus	other
HMGN5	high mobility group nucleosome binding domain 5	HMGN5	HMGN5	HMGN5	0.033	0.819	0.416	0.146	0.259	0.436	Nucleus	transcription regulator
HNMT	histamine N-methyltransferase	HNMT	HNMT	HNMT	-0.088	0.489	0.337	0.472	0.192	0.644	Cytoplasm	enzyme
HNRNPA0	heterogeneous nuclear ribonucleoprotein A0	HNRNPA0	HNRNPA0	HNRNPA0	-0.024	0.795	0.103	0.674	0.097	0.655	Nucleus	other
HNRNPA1	heterogeneous nuclear ribonucleoprotein A1	HNRNPA1	HNRNPA1	HNRNPA1	-0.128	0.218	-0.185	0.336	0.021	0.875	Nucleus	other
HNRNPA3	heterogeneous nuclear ribonucleoprotein A3	HNRNPA3	HNRNPA3	HNRNPA3	0.074	0.238	0.18	0.000602	0.121	0.41	Nucleus	other
HNRNPA2B1	heterogeneous nuclear ribonucleoprotein A2/B1	HNRNPA2B1	HNRNPA2B1	HNRNPA2B1	0.016	0.731	0.076	0.454	0.039	0.756	Nucleus	other
HNRNPAB	heterogeneous nuclear ribonucleoprotein A/B	HNRNPAB	HNRNPAB	HNRNPAB	0.007	0.967	0.155	0.34	0.042	0.569	Nucleus	enzyme
HNRNPC	heterogeneous nuclear ribonucleoprotein C	HNRNPC	HNRNPC	HNRNPC	-0.018	0.745	0.03	0.818	0.004	0.959	Nucleus	other
HNRNPD	heterogeneous nuclear ribonucleoprotein D	HNRNPD	HNRNPD	HNRNPD	0.005	0.959	-0.091	0.507	0.033	0.753	Nucleus	transcription regulator
HNRNPDL	heterogeneous nuclear ribonucleoprotein D like	HNRPDL	HNRPDL	HNRPDL	0.153	0.127	0.012	0.92	0.151	0.108	Nucleus	other	unspecified application
HNRNPF	heterogeneous nuclear ribonucleoprotein F	HNRNPF	HNRNPF	HNRNPF	-0.014	0.933	0.008	0.943	-0.042	0.802	Nucleus	other
HNRNPH1	heterogeneous nuclear ribonucleoprotein H1	HNRNPH1	HNRNPH1	HNRNPH1	-0.073	0.478	0.087	0.554	-0.02	0.923	Nucleus	other	diagnosis
HNRNPH2	heterogeneous nuclear ribonucleoprotein H2	HNRNPH2	HNRNPH2	HNRNPH2	-0.072	0.703	-0.136	0.612	0.131	0.685	Nucleus	other
HNRNPH3	heterogeneous nuclear ribonucleoprotein H3	HNRNPH3	HNRNPH3	HNRNPH3	0.049	0.391	0.079	0.463	0.09	0.445	Nucleus	other
HNRNPK	heterogeneous nuclear ribonucleoprotein K	HNRNPK	HNRNPK	HNRNPK	0.069	0.133	0.06	0.548	0.067	0.638	Nucleus	other	prognosis
HNRNPL	heterogeneous nuclear ribonucleoprotein L	HNRNPL	HNRNPL	HNRNPL	0.011	0.82	0.053	0.144	0.119	0.0516	Nucleus	other
HNRNPLL	heterogeneous nuclear ribonucleoprotein L like	HNRPLL	HNRPLL	HNRPLL	0.31	0.451	0.605	0.351	0.456	0.213	Other	other
HNRNPM	heterogeneous nuclear ribonucleoprotein M	HNRNPM	HNRNPM	HNRNPM	0.005	0.708	0	0.997	0.003	0.973	Nucleus	other
HNRNPR	heterogeneous nuclear ribonucleoprotein R	HNRNPR	HNRNPR	HNRNPR	-0.131	0.463	-0.09	0.621	-0.071	0.575	Nucleus	other
HNRNPU	heterogeneous nuclear ribonucleoprotein U	HNRNPU	HNRNPU	HNRNPU	-0.097	0.417	0.051	0.687	0.011	0.904	Nucleus	transporter	unspecified application
HNRNPUL1	heterogeneous nuclear ribonucleoprotein U like 1	HNRNPUL1	HNRNPUL1	HNRNPUL1	0.025	0.847	0.218	0.00876	0.121	0.151	Nucleus	other	unspecified application
HNRNPUL2	heterogeneous nuclear ribonucleoprotein U like 2	HNRNPUL2	HNRNPUL2	HNRNPUL2	-0.067	0.363	-0.027	0.838	0.087	0.62	Nucleus	other
HOPX	HOP homeobox	HOPX	HOPX	HOPX	-0.105		-0.121		0.033		Nucleus	transcription regulator
HP	haptoglobin	HP	HP	HP	0.115	0.522	0.235	0.487	-0.027	0.886	Extracellular Space	peptidase	diagnosis,efficacy,unspecified application
HP1BP3	heterochromatin protein 1 binding protein 3	HP1BP3	HP1BP3	HP1BP3	0.028	0.884	0.328	0.0895	0.198	0.221	Nucleus	other
HPCAL1	hippocalcin like 1	HPCAL1	HPCAL1	HPCAL1	-0.083	0.459	-0.102	0.602	0.465	0.44	Cytoplasm	other
HPF1	histone PARylation factor 1	C4orf27	C4orf27	C4orf27	0.26	0.206	0.053	0.577	-0.091	0.404	Nucleus	other
HPRT1	hypoxanthine phosphoribosyltransferase 1	HPRT1	HPRT1	HPRT1	-0.122	0.808	-0.032	0.875	-0.211	0.796	Cytoplasm	enzyme		6-mercaptopurine,6-mercaptopurine/methotrexate,6-mercaptopurine/methotrexate/tretinoin,6-mercaptopurine/prednisone,6-mercaptopurine/prednisone/thioguanine,6-mercaptopurine/vincristine,azathioprine,cyclophosphamide/cytarabine/6-mercaptopurine,cytarabine/daunorubicin/thioguanine,cytarabine/thioguanine,dasatinib/6-mercaptopurine/methotrexate,daunorubicin/etoposide/6-mercaptopurine/mitoxantrone/predn…
HPX	hemopexin	HPX	HPX	HPX	-0.1	0.732	-0.047	0.91	-0.245	0.308	Extracellular Space	transporter	unspecified application
HRG	histidine rich glycoprotein	HRG	HRG	HRG	0.049	0.753	0.032	0.901	0.088	0.278	Extracellular Space	other
HSBP1	heat shock factor binding protein 1	HSBP1	HSBP1	HSBP1	0.31	0.403	0.005	0.979	0.139	0.568	Nucleus	other
HSD17B4	hydroxysteroid 17-beta dehydrogenase 4	HSD17B4	HSD17B4	HSD17B4	0.026	0.86	0.014	0.913	-0.056	0.8	Cytoplasm	enzyme
HSD17B10	hydroxysteroid 17-beta dehydrogenase 10	HSD17B10	HSD17B10	HSD17B10	-0.192	0.396	0.152	0.634	0.075	0.73	Cytoplasm	enzyme
HSD17B12	hydroxysteroid 17-beta dehydrogenase 12	HSD17B12	HSD17B12	HSD17B12	-0.08	0.61	0.071	0.841	0.076	0.713	Cytoplasm	enzyme
HSDL2	hydroxysteroid dehydrogenase like 2	HSDL2	HSDL2	HSDL2	-0.017	0.938	0.317	0.206	0.131	0.586	Cytoplasm	transporter
HSP90AA1	heat shock protein 90 alpha family class A member 1	HSP90AA1	HSP90AA1	HSP90AA1	-0.108	0.119	-0.087	0.267	-0.058	0.627	Cytoplasm	enzyme	safety,unspecified application	alvespimycin,cisplatin,luminespib,retaspimycin,TAS-116
HSP90AB1	heat shock protein 90 alpha family class B member 1	HSP90AB1	HSP90AB1	HSP90AB1	0.031	0.764	0.071	0.285	-0.018	0.835	Cytoplasm	enzyme		alvespimycin,cisplatin,retaspimycin,TAS-116
HSP90B1	heat shock protein 90 beta family member 1	HSP90B1	HSP90B1	HSP90B1	-0.178	0.449	-0.249	0.371	-0.127	0.638	Cytoplasm	other		alvespimycin,cisplatin,retaspimycin
HSPA2	heat shock protein family A (Hsp70) member 2	HSPA2	HSPA2	HSPA2	-0.204	0.62	-0.283	0.325	-0.307	0.439	Cytoplasm	other
HSPA4	heat shock protein family A (Hsp70) member 4	HSPA4	HSPA4	HSPA4	0.018	0.852	0.003	0.977	0.007	0.935	Cytoplasm	other	efficacy
HSPA5	heat shock protein family A (Hsp70) member 5	HSPA5	HSPA5	HSPA5	-0.183	0.235	-0.304	0.151	-0.143	0.57	Cytoplasm	enzyme	efficacy,unspecified application	PAT-SM6
HSPA8	heat shock protein family A (Hsp70) member 8	HSPA8	HSPA8	HSPA8	-0.05	0.458	-0.121	0.273	-0.112	0.459	Cytoplasm	enzyme	diagnosis
HSPA9	heat shock protein family A (Hsp70) member 9	HSPA9	HSPA9	HSPA9	-0.053	0.617	-0.047	0.773	0.01	0.943	Cytoplasm	other
HSPA12A	heat shock protein family A (Hsp70) member 12A	HSPA12A	HSPA12A	HSPA12A	-0.041	0.79	0.079	0.649	0.034	0.879	Cytoplasm	other
HSPA1A/HSPA1B	heat shock protein family A (Hsp70) member 1A	HSPA1A	HSPA1A	HSPA1A	0.065	0.708	0.082	0.713	0.056	0.788	Cytoplasm	enzyme	unspecified application
HSPB1	heat shock protein family B (small) member 1	HSPB1	HSPB1	HSPB1	-0.13	0.544	-0.18	0.205	-0.228	0.254	Cytoplasm	other	diagnosis,efficacy
HSPB6	heat shock protein family B (small) member 6	HSPB6	HSPB6	HSPB6	0.08	0.775	0.066	0.768	0.143	0.598	Cytoplasm	other
HSPD1	heat shock protein family D (Hsp60) member 1	HSPD1	HSPD1	HSPD1	-0.157	0.189	-0.051	0.619	-0.074	0.585	Cytoplasm	enzyme	diagnosis,prognosis
HSPE1	--	HSPE1	HSPE1	HSPE1	-0.026	0.727	0.013	0.951	-0.019	0.925	Other	other
HSPG2	heparan sulfate proteoglycan 2	HSPG2	HSPG2	HSPG2	-0.095	0.623	0.077	0.831	0.202	0.426	Extracellular Space	enzyme	unspecified application
HSPH1	heat shock protein family H (Hsp110) member 1	HSPH1	HSPH1	HSPH1	-0.228	0.213	-0.327	0.178	-0.237	0.336	Cytoplasm	other
HTATSF1	HIV-1 Tat specific factor 1	HTATSF1	HTATSF1	HTATSF1	0.045	0.696	0.227	0.411	0.021	0.862	Nucleus	transcription regulator
HTT	huntingtin	HTT	HTT	HTT	-0.108		0.849		0.269		Cytoplasm	transcription regulator	unspecified application
HUWE1	HECT, UBA and WWE domain containing E3 ubiquitin protein ligase 1	HUWE1	HUWE1	HUWE1	-0.019	0.86	0.328	0.0676	0.115	0.263	Nucleus	transcription regulator	unspecified application
HYOU1	hypoxia up-regulated 1	HYOU1	HYOU1	HYOU1	-0.086	0.532	-0.172	0.327	-0.116	0.558	Cytoplasm	other
IAH1	isoamyl acetate hydrolyzing esterase 1 (putative)	IAH1	IAH1	IAH1	-0.128	0.621	0.037	0.754	-0.052	0.592	Cytoplasm	other
IARS1	isoleucyl-tRNA synthetase 1	IARS	IARS	IARS	-0.175	0.259	-0.266	0.233	-0.208	0.0779	Cytoplasm	enzyme
IARS2	isoleucyl-tRNA synthetase 2, mitochondrial	IARS2	IARS2	IARS2	-0.159	0.316	0.168	0.295	-0.042	0.416	Cytoplasm	enzyme
ICAM1	intercellular adhesion molecule 1	ICAM1	ICAM1	ICAM1	-0.268		0.143		0.279		Plasma Membrane	transmembrane receptor	diagnosis,efficacy,prognosis,unspecified application	BI-505,tyroserleutide
IDH1	isocitrate dehydrogenase (NADP(+)) 1	IDH1	IDH1	IDH1	-0.048	0.368	-0.06	0.231	-0.102	0.261	Cytoplasm	enzyme	unspecified application	BAY1436032,DS-1001,IDH1 inhibitor,IDH305,ivosidenib,olutasidenib
IDH2	isocitrate dehydrogenase (NADP(+)) 2	IDH2	IDH2	IDH2	-0.182	0.196	-0.212	0.272	-0.139	0.532	Cytoplasm	enzyme	unspecified application	enasidenib,TQB3455
IDH3A	isocitrate dehydrogenase (NAD(+)) 3 catalytic subunit alpha	IDH3A	IDH3A	IDH3A	-0.128	0.349	-0.117	0.514	0.006	0.967	Cytoplasm	enzyme
IDH3B	isocitrate dehydrogenase (NAD(+)) 3 non-catalytic subunit beta	IDH3B	IDH3B	IDH3B	-0.252	0.232	-0.229	0.61	-0.107	0.67	Cytoplasm	enzyme
IFI16	interferon gamma inducible protein 16	IFI16	IFI16	IFI16	-0.337	0.301	-0.084	0.691	-0.116	0.552	Nucleus	transcription regulator	unspecified application
IGFBP7	insulin like growth factor binding protein 7	IGFBP7	IGFBP7	IGFBP7	0.338	0.164	0.017	0.982	0.54	0.396	Extracellular Space	transporter
IGHA1	immunoglobulin heavy constant alpha 1	IGHA1	IGHA1	IGHA1	-1.005	0.00722	-1.05	0.0209	-0.865	0.0557	Extracellular Space	other
IGHA2	immunoglobulin heavy constant alpha 2 (A2m marker)	IGHA2	IGHA2	IGHA2	-0.71	0.0326	-1.016	0.0417	-0.493	0.212	Extracellular Space	other
IGHG1	immunoglobulin heavy constant gamma 1 (G1m marker)	IGHG1	IGHG1	IGHG1	-0.006	0.979	-0.009	0.98	-0.145	0.356	Extracellular Space	other
IGHG2	immunoglobulin heavy constant gamma 2 (G2m marker)	IGHG2	IGHG2	IGHG2	-0.18	0.484	0.036	0.936	-0.108	0.451	Plasma Membrane	other
IGHG3	immunoglobulin heavy constant gamma 3 (G3m marker)	IGHG3	IGHG3	IGHG3	0.191	0.371	0.061	0.891	-0.16	0.288	Extracellular Space	other
IGHG4	immunoglobulin heavy constant gamma 4 (G4m marker)	IGHG4	IGHG4	IGHG4	0.016	0.938	0.373	0.412	-0.003	0.989	Extracellular Space	other
IGHM	immunoglobulin heavy constant mu	IGHM	IGHM	IGHM	-0.082	0.475	0.144	0.567	-0.058	0.772	Plasma Membrane	transmembrane receptor	unspecified application
IGKC	immunoglobulin kappa constant	IGKC	IGKC	IGKC	-0.208	0.225	-0.222	0.301	-0.311	0.0469	Extracellular Space	other	unspecified application
IGKV4-1	immunoglobulin kappa variable 4-1	IGKV4-1	IGKV4-1	IGKV4-1	0.675	0.39	0.677	0.464	-0.366	0.335	Extracellular Space	other
IGLC2	immunoglobulin lambda constant 2	IGLC2	IGLC2	IGLC2	-0.318	0.104	-0.072	0.843	-0.268	0.0687	Extracellular Space	other
IGLL1/IGLL5	immunoglobulin lambda like polypeptide 1	IGLL5	IGLL5	IGLL5	-0.414	0.0582	-0.107	0.757	-0.195	0.222	Plasma Membrane	other
IL1RN	interleukin 1 receptor antagonist	IL1RN	IL1RN	IL1RN	0.038	0.959	-0.009	0.988	-0.523	0.517	Extracellular Space	cytokine	efficacy
IL4I1	interleukin 4 induced 1	IL4I1	IL4I1	IL4I1	-0.33	0.764	-0.007	0.994	-0.1	0.961	Cytoplasm	enzyme
ILF2	interleukin enhancer binding factor 2	ILF2	ILF2	ILF2	-0.097	0.37	-0.015	0.915	-0.042	0.669	Nucleus	transcription regulator
ILF3	interleukin enhancer binding factor 3	ILF3	ILF3	ILF3	-0.133	0.151	0.03	0.831	-0.048	0.718	Nucleus	transcription regulator
ILK	integrin linked kinase	ILK	ILK	ILK	0.011	0.951	0.037	0.874	0.144	0.471	Plasma Membrane	kinase
IMMT	inner membrane mitochondrial protein	IMMT	IMMT	IMMT	0.01	0.694	0.158	0.22	0.041	0.604	Cytoplasm	other
IMPA1	inositol monophosphatase 1	IMPA1	IMPA1	IMPA1	0.016	0.894	-0.011	0.951	-0.108	0.224	Cytoplasm	phosphatase
IMPDH2	inosine monophosphate dehydrogenase 2	IMPDH2	IMPDH2	IMPDH2	0.033	0.818	0	1	-0.043	0.841	Cytoplasm	enzyme		6-mercaptopurine/prednisone/thioguanine,cytarabine/daunorubicin/thioguanine,cytarabine/thioguanine,IFNA2B/ribavirin,imatinib/thioguanine,interferon alfacon-1/ribavirin,methylprednisolone/mycophenolate mofetil,mycophenolate mofetil,mycophenolate mofetil/prednisone,mycophenolic acid,pegintron/ribavirin,ribavirin,thioguanine,VX-944
INF2	inverted formin 2	INF2	INF2	INF2	0.082	0.505	0.293	0.152	0.064	0.674	Cytoplasm	other
IPO5	importin 5	IPO5	IPO5	IPO5	-0.043	0.473	-0.063	0.498	-0.211	0.177	Nucleus	transporter
IPO7	importin 7	IPO7	IPO7	IPO7	-0.069	0.552	-0.047	0.843	-0.253	0.396	Nucleus	transporter
IQGAP1	IQ motif containing GTPase activating protein 1	IQGAP1	IQGAP1	IQGAP1	-0.017	0.881	0.091	0.385	0.081	0.37	Cytoplasm	other
IQGAP2	IQ motif containing GTPase activating protein 2	IQGAP2	IQGAP2	IQGAP2	0.066	0.773	0.076	0.717	-0.264	0.45	Cytoplasm	other
IQSEC1	IQ motif and Sec7 domain ArfGEF 1	IQSEC1	IQSEC1	IQSEC1	0.275		0.194		-0.035		Cytoplasm	other
ISOC1	isochorismatase domain containing 1	ISOC1	ISOC1	ISOC1	-0.056	0.655	0.324	0.391	0.306	0.357	Cytoplasm	enzyme	unspecified application
ISOC2	isochorismatase domain containing 2	ISOC2	ISOC2	ISOC2	0.216	0.31	-0.15	0.597	0.306	0.347	Cytoplasm	enzyme
IST1	IST1 factor associated with ESCRT-III	IST1	IST1	IST1	-0.024	0.944	0.619	0.189	-0.044	0.728	Cytoplasm	other
ISYNA1	inositol-3-phosphate synthase 1	ISYNA1	ISYNA1	ISYNA1	-0.117	0.45	-0.058	0.633	0.013	0.962	Cytoplasm	enzyme
ITGA1	integrin subunit alpha 1	ITGA1	ITGA1	ITGA1	-0.104	0.558	0.212	0.434	0.082	0.727	Plasma Membrane	other
ITGA3	integrin subunit alpha 3	ITGA3	ITGA3	ITGA3	0.139	0.234	-0.038	0.467	0.163	0.272	Plasma Membrane	other	prognosis
ITGA5	integrin subunit alpha 5	ITGA5	ITGA5	ITGA5	0.015	0.967	-0.289	0.301	-0.315	0.715	Plasma Membrane	transmembrane receptor	prognosis
ITGA6	integrin subunit alpha 6	ITGA6	ITGA6	ITGA6	-0.043	0.637	0.036	0.784	0.074	0.606	Plasma Membrane	transmembrane receptor
ITGAV	integrin subunit alpha V	ITGAV	ITGAV	ITGAV	-0.103	0.852	0.243	0.443	0.1	0.606	Plasma Membrane	transmembrane receptor	diagnosis	68Ga-NOTA-BBN-RGD,abciximab,abituzumab,cilengitide,etaracizumab,fluciclatide F 18,intetumumab
ITGB1	integrin subunit beta 1	ITGB1	ITGB1	ITGB1	-0.188	0.578	0.232	0.487	0.105	0.67	Plasma Membrane	transmembrane receptor	disease progression,prognosis
ITGB4	integrin subunit beta 4	ITGB4	ITGB4	ITGB4	-0.128	0.742	-0.076	0.873	-0.412	0.507	Plasma Membrane	transmembrane receptor	diagnosis
ITGB5	integrin subunit beta 5	ITGB5	ITGB5	ITGB5	-0.478	0.358	-0.042	0.892	0.148	0.189	Plasma Membrane	other	diagnosis	cilengitide
ITIH1	inter-alpha-trypsin inhibitor heavy chain 1	ITIH1	ITIH1	ITIH1	0.017	0.907	0.34	0.141	0.086	0.651	Extracellular Space	other
ITIH2	inter-alpha-trypsin inhibitor heavy chain 2	ITIH2	ITIH2	ITIH2	-0.145	0.152	0.128	0.523	-0.094	0.581	Extracellular Space	other
ITIH4	inter-alpha-trypsin inhibitor heavy chain 4	ITIH4	ITIH4	ITIH4	0.19	0.396	0.234	0.476	-0.039	0.797	Extracellular Space	other
ITPA	inosine triphosphatase	ITPA	ITPA	ITPA	-0.075	0.712	-0.289	0.347	-0.276	0.294	Cytoplasm	enzyme	safety
IVD	isovaleryl-CoA dehydrogenase	IVD	IVD	IVD	0.092		-0.228		0.113		Cytoplasm	enzyme
IVL	involucrin	IVL	IVL	IVL	0.061	0.899	0.288	0.335	0.022	0.952	Cytoplasm	other	unspecified application
JAGN1	jagunal homolog 1	JAGN1	JAGN1	JAGN1	-0.091	0.582	0.43	0.265	0.237	0.131	Cytoplasm	other
JCHAIN	joining chain of multimeric IgA and IgM	IGJ	IGJ	IGJ	-1.24	0.0105	-1.182	0.0134	-0.812	0.135	Extracellular Space	other
JUP	junction plakoglobin	JUP	JUP	JUP	-0.269	0.648	-0.26	0.526	-0.396	0.51	Plasma Membrane	other	diagnosis,unspecified application
KANK2	KN motif and ankyrin repeat domains 2	KANK2	KANK2	KANK2	0.062	0.71	0.168	0.387	0.164	0.491	Nucleus	transcription regulator
KARS1	lysyl-tRNA synthetase 1	KARS	KARS	KARS	-0.022	0.78	-0.066	0.707	0.05	0.751	Cytoplasm	enzyme	unspecified application
KCTD12	potassium channel tetramerization domain containing 12	KCTD12	KCTD12	KCTD12	0.061	0.65	-0.107	0.172	0.072	0.43	Plasma Membrane	ion channel
KHDRBS1	KH RNA binding domain containing, signal transduction associated 1	KHDRBS1	KHDRBS1	KHDRBS1	-0.229	0.257	-0.249	0.366	-0.232	0.176	Nucleus	transcription regulator		CWP232291
KHSRP	KH-type splicing regulatory protein	KHSRP	KHSRP	KHSRP	-0.037	0.683	0.074	0.546	0.042	0.741	Nucleus	enzyme	unspecified application
KIAA1217	KIAA1217	KIAA1217	KIAA1217	KIAA1217	-0.173	0.808	0.35	0.316	-0.378	0.344	Cytoplasm	other
KIF13B	kinesin family member 13B	KIF13B	KIF13B	KIF13B	0.392		0.842		-0.332		Cytoplasm	other
KIF5B	kinesin family member 5B	KIF5B	KIF5B	KIF5B	-0.081	0.447	-0.019	0.879	0.015	0.781	Cytoplasm	other
KLC1	kinesin light chain 1	KLC1	KLC1	KLC1	0.4	0.206	0.393	0.22	0.487	0.157	Cytoplasm	other
KLK6	kallikrein related peptidase 6	KLK6	KLK6	KLK6	0.072	0.97	-0.736	0.403	-0.176	0.884	Extracellular Space	peptidase	diagnosis,prognosis
KLK10	kallikrein related peptidase 10	KLK10	KLK10	KLK10	0.226	0.115	0.177	0.401	-0.202	0.101	Extracellular Space	peptidase	diagnosis,prognosis,response to therapy
KLK13	kallikrein related peptidase 13	KLK13	KLK13	KLK13	0.151	0.0987	0.093	0.847	-0.36	0.636	Extracellular Space	peptidase	prognosis
KNG1	kininogen 1	KNG1	KNG1	KNG1	0.097	0.74	0.103	0.81	0.052	0.856	Extracellular Space	other
KPNA3	karyopherin subunit alpha 3	KPNA3	KPNA3	KPNA3	0.094	0.472	-0.069	0.886	-0.162	0.111	Nucleus	transporter
KPNB1	karyopherin subunit beta 1	KPNB1	KPNB1	KPNB1	-0.076	0.379	-0.039	0.698	-0.02	0.804	Nucleus	other
KRAS	KRAS proto-oncogene, GTPase	KRAS	KRAS	KRAS	0.139	0.23	0.505	0.289	0.11	0.667	Cytoplasm	enzyme	diagnosis,efficacy,prognosis,response to therapy,unspecified application	AZD4785,chelerythrine,GDC-6036,JNJ-74699157,LY3499446,MRTX849
KRT1	keratin 1	KRT1	KRT1	KRT1	-0.069	0.89	-0.281	0.474	-0.594	0.443	Cytoplasm	other	diagnosis
KRT2	keratin 2	KRT2	KRT2	KRT2	0.734	0.15	0.227	0.379	0.131	0.818	Cytoplasm	other		CIGB-300,silmitasertib
KRT3	keratin 3	KRT3	KRT3	KRT3	-0.571	0.792	-1.163	0.537	-0.978	0.615	Cytoplasm	other
KRT4	keratin 4	KRT4	KRT4	KRT4	0.104	0.919	0.122	0.857	-0.165	0.79	Cytoplasm	other
KRT5	keratin 5	KRT5	KRT5	KRT5	-0.562	0.566	-0.693	0.341	-0.297	0.766	Cytoplasm	other	diagnosis,efficacy,unspecified application
KRT7	keratin 7	KRT7	KRT7	KRT7	-0.301	0.642	-0.581	0.299	-0.637	0.472	Cytoplasm	other	unspecified application
KRT8	keratin 8	KRT8	KRT8	KRT8	-0.295	0.558	-0.647	0.319	-0.843	0.295	Cytoplasm	other	prognosis
KRT9	keratin 9	KRT9	KRT9	KRT9	-0.282	0.6	-0.223	0.598	-0.13	0.877	Cytoplasm	other	diagnosis
KRT10	keratin 10	KRT10	KRT10	KRT10	-0.797	0.431	-1.092	0.269	-0.969	0.374	Cytoplasm	other
KRT13	keratin 13	KRT13	KRT13	KRT13	0.079	0.926	-0.11	0.884	-0.148	0.821	Cytoplasm	other
KRT14	keratin 14	KRT14	KRT14	KRT14	-0.647	0.406	-0.618	0.278	-0.597	0.412	Cytoplasm	other	unspecified application
KRT15	keratin 15	KRT15	KRT15	KRT15	-0.694	0.379	-0.677	0.279	-0.751	0.348	Cytoplasm	other
KRT16	keratin 16	KRT16	KRT16	KRT16	-0.925	0.273	-0.929	0.276	-1.229	0.183	Cytoplasm	other
KRT17	keratin 17	KRT17	KRT17	KRT17	-0.654	0.465	-0.761	0.287	-0.248	0.792	Cytoplasm	other	diagnosis,efficacy
KRT18	keratin 18	KRT18	KRT18	KRT18	-0.067	0.784	-0.244	0.458	-0.419	0.289	Cytoplasm	other	efficacy
KRT19	keratin 19	KRT19	KRT19	KRT19	-0.599	0.449	-0.983	0.26	-1.044	0.39	Cytoplasm	other	diagnosis,disease progression,prognosis,unspecified application
KRT24	keratin 24	KRT24	KRT24	KRT24	-3.002				-4.911		Cytoplasm	other
KRT75	keratin 75	KRT75	KRT75	KRT75	0.895		-2.017		-2.192		Cytoplasm	other
KRT78	keratin 78	KRT78	KRT78	KRT78	0.053	0.914	-0.107	0.8	-0.449	0.462	Cytoplasm	other
KRT80	keratin 80	KRT80	KRT80	KRT80	0.436	0.371	0.035	0.917	0.128	0.174	Cytoplasm	other
KRT83	keratin 83	KRT83	KRT83	KRT83	-0.389		0.03		-0.178		Cytoplasm	other
KRT6A	keratin 6A	KRT6A	KRT6A	KRT6A	-0.246	0.75	-0.6	0.481	-0.556	0.463	Cytoplasm	other	diagnosis
KRT6B	keratin 6B	KRT6B	KRT6B	KRT6B	-0.24	0.691	-0.477	0.573	-0.417	0.557	Cytoplasm	other	diagnosis
KRT6C	keratin 6C	KRT6C	KRT6C	KRT6C	0.075	0.876	0.118	0.735	-0.165	0.698	Cytoplasm	other
KTN1	kinectin 1	KTN1	KTN1	KTN1	0.161	0.0127	0.051	0.616	0.106	0.36	Plasma Membrane	transmembrane receptor
KYNU	kynureninase	KYNU	KYNU	KYNU	0.839		1.265		1.109		Cytoplasm	enzyme
LAD1	ladinin 1	LAD1	LAD1	LAD1	0.168	0.492	0.088	0.754	0.134	0.23	Extracellular Space	other
LAMA2	laminin subunit alpha 2	LAMA2	LAMA2	LAMA2	-0.109	0.373	0.366	0.0409	0.241	0.367	Extracellular Space	other
LAMA3	laminin subunit alpha 3	LAMA3	LAMA3	LAMA3	-0.151	0.384	-0.258	0.332	-0.214	0.389	Extracellular Space	other	diagnosis
LAMA4	laminin subunit alpha 4	LAMA4	LAMA4	LAMA4	0.054	0.706	0.104	0.689	0.166	0.568	Extracellular Space	enzyme
LAMA5	laminin subunit alpha 5	LAMA5	LAMA5	LAMA5	-0.137	0.379	0.017	0.957	0.158	0.363	Extracellular Space	other	diagnosis
LAMB1	laminin subunit beta 1	LAMB1	LAMB1	LAMB1	-0.115	0.441	0.079	0.702	0.169	0.435	Extracellular Space	other
LAMB2	laminin subunit beta 2	LAMB2	LAMB2	LAMB2	0.001	0.993	0.173	0.613	0.275	0.258	Extracellular Space	enzyme
LAMB3	laminin subunit beta 3	LAMB3	LAMB3	LAMB3	-0.06	0.837	0.029	0.933	0.086	0.847	Extracellular Space	transporter
LAMC1	laminin subunit gamma 1	LAMC1	LAMC1	LAMC1	-0.076	0.585	0.043	0.841	0.171	0.303	Extracellular Space	other
LAMC2	laminin subunit gamma 2	LAMC2	LAMC2	LAMC2	-0.233	0.551	-0.169	0.641	-0.224	0.683	Extracellular Space	other	diagnosis
LAMP1	lysosomal associated membrane protein 1	LAMP1	LAMP1	LAMP1	-0.143	0.475	-0.026	0.923	-0.213	0.427	Plasma Membrane	other		SAR428926
LAMTOR1	late endosomal/lysosomal adaptor, MAPK and MTOR activator 1	LAMTOR1	LAMTOR1	LAMTOR1	-0.073	0.377	-0.032	0.79	-0.042	0.748	Plasma Membrane	other
LANCL1	LanC like 1	LANCL1	LANCL1	LANCL1	-0.086	0.386	0.045	0.572	0.038	0.747	Plasma Membrane	enzyme
LAP3	leucine aminopeptidase 3	LAP3	LAP3	LAP3	-0.131	0.335	-0.005	0.982	-0.08	0.721	Cytoplasm	peptidase	safety
LARP1	La ribonucleoprotein 1, translational regulator	LARP1	LARP1	LARP1	-0.104	0.528	-0.03	0.914	0.012	0.954	Cytoplasm	translation regulator
LARS1	leucyl-tRNA synthetase 1	LARS	LARS	LARS	-0.024	0.687	-0.036	0.79	0.149	0.479	Cytoplasm	enzyme
LASP1	LIM and SH3 protein 1	LASP1	LASP1	LASP1	0.1	0.4	0.157	0.183	0.151	0.0988	Cytoplasm	transporter
LCN2	lipocalin 2	LCN2	LCN2	LCN2	-0.636	0.141	-0.382	0.467	-0.62	0.357	Extracellular Space	transporter	diagnosis,unspecified application
LCP1	lymphocyte cytosolic protein 1	LCP1	LCP1	LCP1	-0.316	0.265	0.031	0.918	-0.256	0.613	Cytoplasm	other	disease progression
LDHA	lactate dehydrogenase A	LDHA	LDHA	LDHA	-0.135	0.408	-0.126	0.539	-0.141	0.558	Cytoplasm	enzyme	efficacy,unspecified application
LDHB	lactate dehydrogenase B	LDHB	LDHB	LDHB	-0.152	0.0892	0.018	0.928	0.04	0.811	Cytoplasm	enzyme	unspecified application
LEMD2	LEM domain nuclear envelope protein 2	LEMD2	LEMD2	LEMD2	0.04	0.867	0.377	0.312	0.119	0.401	Nucleus	other
LETM1	leucine zipper and EF-hand containing transmembrane protein 1	LETM1	LETM1	LETM1	0.11	0.711	0.327	0.35	0.137	0.485	Cytoplasm	transporter
LGALS1	galectin 1	LGALS1	LGALS1	LGALS1	-0.082	0.3	0.019	0.897	0.095	0.542	Extracellular Space	other	diagnosis,prognosis	OTX008
LGALS3	galectin 3	LGALS3	LGALS3	LGALS3	0.02	0.776	0.09	0.205	0.088	0.359	Extracellular Space	other	diagnosis,unspecified application	GCS-100,GR-MD-02
LGALS3BP	galectin 3 binding protein	LGALS3BP	LGALS3BP	LGALS3BP	-0.274	0.0132	0.032	0.805	-0.15	0.321	Plasma Membrane	transmembrane receptor	prognosis
LGALS7/LGALS7B	galectin 7	LGALS7	LGALS7	LGALS7	-0.277	0.615	-0.352	0.464	-0.599	0.323	Extracellular Space	other	disease progression
LIMA1	LIM domain and actin binding 1	LIMA1	LIMA1	LIMA1	-0.113	0.606	0.089	0.485	0.017	0.943	Cytoplasm	other
LIMS1	LIM zinc finger domain containing 1	LIMS1	LIMS1	LIMS1	-0.078	0.436	0.245	0.371	0.097	0.177	Plasma Membrane	other
LIMS2	LIM zinc finger domain containing 2	LIMS2	LIMS2	LIMS2	0.376	0.534	-0.014	0.963	-0.062	0.916	Cytoplasm	other
LMAN1	lectin, mannose binding 1	LMAN1	LMAN1	LMAN1	-0.074	0.61	0.056	0.767	-0.055	0.701	Cytoplasm	other
LMAN2	lectin, mannose binding 2	LMAN2	LMAN2	LMAN2	-0.253	0.192	-0.139	0.629	-0.052	0.76	Cytoplasm	transporter
LMNA	lamin A/C	LMNA	LMNA	LMNA	-0.064	0.609	-0.03	0.648	-0.039	0.759	Nucleus	other
LMNB1	lamin B1	LMNB1	LMNB1	LMNB1	-0.143	0.314	-0.041	0.846	-0.121	0.536	Nucleus	other
LMNB2	lamin B2	LMNB2	LMNB2	LMNB2	-0.012	0.915	0.096	0.53	0.069	0.779	Nucleus	other
LMO7	LIM domain 7	LMO7	LMO7	LMO7	0.563	0.366	0.296	0.357	0.492	0.268	Cytoplasm	enzyme
LMOD1	leiomodin 1	LMOD1	LMOD1	LMOD1	0.229	0.559	0.513	0.542	0.582	0.399	Cytoplasm	other	unspecified application
LONP1	lon peptidase 1, mitochondrial	LONP1	LONP1	LONP1	-0.033	0.75	0.056	0.672	0.051	0.659	Cytoplasm	peptidase
LOXL1	lysyl oxidase like 1	LOXL1	LOXL1	LOXL1	-0.835		-0.745		-0.427		Extracellular Space	enzyme	unspecified application
LPP	LIM domain containing preferred translocation partner in lipoma	LPP	LPP	LPP	-0.024	0.91	0.166	0.706	0.254	0.543	Nucleus	other
LRG1	leucine rich alpha-2-glycoprotein 1	LRG1	LRG1	LRG1	-0.162	0.563	0.044	0.958	-0.121	0.553	Extracellular Space	other
LRP1	LDL receptor related protein 1	LRP1	LRP1	LRP1	0.021	0.821	0.17	0.125	0.104	0.221	Plasma Membrane	transmembrane receptor		paclitaxel-angiopep-2 conjugate,serpin peptide 16
LRPAP1	LDL receptor related protein associated protein 1	LRPAP1	LRPAP1	LRPAP1	0.034	0.759	-0.106	0.646	-0.25	0.49	Plasma Membrane	other
LRPPRC	leucine rich pentatricopeptide repeat containing	LRPPRC	LRPPRC	LRPPRC	-0.001	0.993	0.23	0.165	0.06	0.564	Cytoplasm	other
LRRC1	leucine rich repeat containing 1	LRRC1	LRRC1	LRRC1	-0.27	0.553	-0.291	0.448	-0.026	0.968	Cytoplasm	other
LRRC47	leucine rich repeat containing 47	LRRC47	LRRC47	LRRC47	0.16	0.273	0.499	0.156	0.074	0.786	Other	other
LRRC59	leucine rich repeat containing 59	LRRC59	LRRC59	LRRC59	-0.108	0.55	0.106	0.651	0.007	0.971	Cytoplasm	other
LRRFIP1	LRR binding FLII interacting protein 1	LRRFIP1	LRRFIP1	LRRFIP1	-0.062	0.694	0.108	0.453	0.038	0.776	Cytoplasm	transcription regulator
LRRFIP2	LRR binding FLII interacting protein 2	LRRFIP2	LRRFIP2	LRRFIP2	0.268	0.26	0.493	0.402	0.262	0.619	Cytoplasm	other
LSM3	LSM3 homolog, U6 small nuclear RNA and mRNA degradation associated	LSM3	LSM3	LSM3	-0.119	0.0772	0.346	0.368	-0.064	0.55	Nucleus	other
LTA4H	leukotriene A4 hydrolase	LTA4H	LTA4H	LTA4H	-0.08	0.0817	-0.043	0.675	-0.088	0.318	Cytoplasm	enzyme
LTBP1	latent transforming growth factor beta binding protein 1	LTBP1	LTBP1	LTBP1	-0.212	0.48	0.05	0.775	-0.004	0.917	Extracellular Space	other
LTBP2	latent transforming growth factor beta binding protein 2	LTBP2	LTBP2	LTBP2	0.433	0.507	0.129	0.9	0.223	0.818	Extracellular Space	other
LTBP4	latent transforming growth factor beta binding protein 4	LTBP4	LTBP4	LTBP4	0.269	0.18	0.265	0.514	0.385	0.0718	Extracellular Space	growth factor
LTF	lactotransferrin	LTF	LTF	LTF	-0.395	0.131	-0.295	0.412	-0.786	0.0803	Extracellular Space	peptidase	efficacy,unspecified application
LUC7L2	LUC7 like 2, pre-mRNA splicing factor	LUC7L2	LUC7L2	LUC7L2	0.013	0.935	0.126	0.263	-0.179	0.28	Nucleus	other
LUM	lumican	LUM	LUM	LUM	0.249	0.276	0.013	0.964	0.201	0.365	Extracellular Space	other
LXN	latexin	LXN	LXN	LXN	-0.087	0.37	-0.09	0.715	-0.164	0.415	Cytoplasm	other
LY6D	lymphocyte antigen 6 family member D	LY6D	LY6D	LY6D	-0.12	0.803	-0.219	0.544	-0.284	0.469	Plasma Membrane	other
LYPD3	LY6/PLAUR domain containing 3	LYPD3	LYPD3	LYPD3	-0.342	0.759	0.244	0.373	-0.261	0.733	Plasma Membrane	other		lupartumab amadotin
LYZ	lysozyme	LYZ	LYZ	LYZ	-1.344	0.0876	-0.204	0.773	-1.014	0.13	Extracellular Space	enzyme	unspecified application
LZIC	leucine zipper and CTNNBIP1 domain containing	LZIC	LZIC	LZIC	-0.164	0.442	0.188	0.261	0.251	0.137	Other	other
MAB21L4	mab-21 like 4	C2orf54	C2orf54	C2orf54	0.067		0.121		-0.078		Other	other
MACF1	microtubule actin crosslinking factor 1	MACF1	MACF1	MACF1	0.038	0.846	-0.047	0.648	-0.113	0.58	Cytoplasm	enzyme
MACROH2A1	macroH2A.1 histone	H2AFY	H2AFY	H2AFY	-0.254	0.228	0.157	0.591	-0.068	0.784	Nucleus	other
MACROH2A2	macroH2A.2 histone	H2AFY2	H2AFY2	H2AFY2	0.063	0.661	0.108	0.702	0.199	0.271	Nucleus	other
MAGT1	magnesium transporter 1	MAGT1	MAGT1	MAGT1	-0.357	0.21	0.094	0.674	-0.083	0.357	Plasma Membrane	enzyme
MAMDC2	MAM domain containing 2	MAMDC2	MAMDC2	MAMDC2	0.261	0.565	0.004	0.989	0.194	0.575	Extracellular Space	other
MANF	mesencephalic astrocyte derived neurotrophic factor	MANF	MANF	MANF	-0.171	0.299	-0.081	0.626	0.055	0.811	Extracellular Space	other
MAOA	monoamine oxidase A	MAOA	MAOA	MAOA	-0.027	0.893	0.102	0.645	-0.043	0.495	Cytoplasm	enzyme		benzphetamine,CX-1370,dextroamphetamine,fenfluramine/phentermine,iproniazid,isocarboxazid,ladostigil,MAO-A inhibitor,methamphetamine,moclobemide,N-(2-indanyl)glycinamide,phenelzine,phentermine,phentermine/topiramate,procainamide,tranylcypromine
MAOB	monoamine oxidase B	MAOB	MAOB	MAOB	-0.137	0.62	0.008	0.984	0.124	0.712	Cytoplasm	enzyme		benzphetamine,dextroamphetamine,fenfluramine/phentermine,isocarboxazid,ladostigil,levodopa/rasagiline,MAO-B inhibitor,methamphetamine,pargyline,phenelzine,phentermine,phentermine/topiramate,procainamide,rasagiline,safinamide,selegiline,tranylcypromine
MAP4	microtubule associated protein 4	MAP4	MAP4	MAP4	-0.051	0.605	-0.07	0.588	0.049	0.477	Cytoplasm	other	efficacy
MAP1A	microtubule associated protein 1A	MAP1A	MAP1A	MAP1A	0.314		0.789		0.87		Cytoplasm	other		estramustine
MAP1B	microtubule associated protein 1B	MAP1B	MAP1B	MAP1B	-0.072	0.697	0.032	0.923	-0.126	0.583	Cytoplasm	other
MAP1S	microtubule associated protein 1S	MAP1S	MAP1S	MAP1S	-0.152	0.335	0.079	0.68	0.088	0.41	Cytoplasm	enzyme
MAP2K2	mitogen-activated protein kinase kinase 2	MAP2K2	MAP2K2	MAP2K2	-0.191	0.394	-0.103	0.66	-0.179	0.576	Cytoplasm	kinase		AS703988,atezolizumab/cobimetinib/vemurafenib,binimetinib,binimetinib/cetuximab/encorafenib,binimetinib/dabrafenib,binimetinib/encorafenib,binimetinib/encorafenib/panitumumab,binimetinib/vemurafenib,cetuximab/dabrafenib/trametinib,cobimetinib,cobimetinib/dabrafenib,cobimetinib/encorafenib,cobimetinib/vemurafenib,dabrafenib/ipilimumab/trametinib,dabrafenib/panitumumab/trametinib,dabrafenib/trameti…
MAPK1	mitogen-activated protein kinase 1	MAPK1	MAPK1	MAPK1	-0.102	0.275	0.07	0.45	-0.013	0.872	Cytoplasm	kinase	efficacy	ASN007,ASTX029,binimetinib,HH2710,KO-947,LTT462,LY-3007113,LY3214996,MAP kinase1 inhibitor,pexmetinib,ulixertinib,ZSET 1446
MAPK3	mitogen-activated protein kinase 3	MAPK3	MAPK3	MAPK3	0.146	0.427	0.121	0.489	0.024	0.47	Cytoplasm	kinase	efficacy	ASN007,ASTX029,HH2710,KO-947,LY3214996,ulixertinib,ZSET 1446
MAPRE1	microtubule associated protein RP/EB family member 1	MAPRE1	MAPRE1	MAPRE1	0.081	0.482	0.116	0.193	0.036	0.537	Cytoplasm	other
MARCKS	myristoylated alanine rich protein kinase C substrate	MARCKS	MARCKS	MARCKS	0.06	0.655	0.293	0.392	0.117	0.572	Plasma Membrane	other		BIO-11006
MARCKSL1	MARCKS like 1	MARCKSL1	MARCKSL1	MARCKSL1	0.255	0.41	0.66	0.478	0.62	0.348	Cytoplasm	other
MARS1	methionyl-tRNA synthetase 1	MARS	MARS	MARS	-0.102	0.436	0.258	0.291	-0.044	0.778	Cytoplasm	enzyme
MAT2A	methionine adenosyltransferase 2A	MAT2A	MAT2A	MAT2A	-0.091	0.273	-0.145	0.524	-0.123	0.37	Cytoplasm	enzyme		AG-270
MAT2B	methionine adenosyltransferase 2B	MAT2B	MAT2B	MAT2B	-0.086	0.447	0.034	0.847	0.06	0.798	Cytoplasm	enzyme
MATN2	matrilin 2	MATN2	MATN2	MATN2	0.142	0.459	0.322	0.541	0.29	0.424	Extracellular Space	other
MATR3	matrin 3	MATR3	MATR3	MATR3	-0.015	0.889	0.019	0.885	-0.015	0.93	Nucleus	other
MBOAT7	membrane bound O-acyltransferase domain containing 7	MBOAT7	MBOAT7	MBOAT7	0.155		0.262		0.468		Plasma Membrane	enzyme
MCAM	melanoma cell adhesion molecule	MCAM	MCAM	MCAM	0.023	0.904	0.316	0.508	0.248	0.432	Plasma Membrane	other	diagnosis,prognosis
MCFD2	multiple coagulation factor deficiency 2, ER cargo receptor complex subunit	MCFD2	MCFD2	MCFD2	-0.006	0.988	0.253	0.568	-0.098		Cytoplasm	other
MDH1	malate dehydrogenase 1	MDH1	MDH1	MDH1	-0.042	0.612	-0.048	0.59	-0.018	0.782	Cytoplasm	enzyme
MDH2	malate dehydrogenase 2	MDH2	MDH2	MDH2	-0.164	0.0934	-0.124	0.391	-0.109	0.478	Cytoplasm	enzyme
ME1	malic enzyme 1	ME1	ME1	ME1	0.994		0.523		0.476		Cytoplasm	enzyme
ME2	malic enzyme 2	ME2	ME2	ME2	0.201	0.352	0.247	0.323	0.043	0.598	Cytoplasm	enzyme
ME3	malic enzyme 3	ME3	ME3	ME3	0.005		0.272		0.168		Cytoplasm	enzyme
MECP2	methyl-CpG binding protein 2	MECP2	MECP2	MECP2	0.077	0.588	0.439	0.0424	0.264	0.254	Nucleus	transcription regulator	unspecified application
MESD	mesoderm development LRP chaperone	MESDC2	MESDC2	MESDC2	-0.025	0.815	-0.046	0.828	-0.172	0.257	Extracellular Space	other
METTL7A	methyltransferase like 7A	METTL7A	METTL7A	METTL7A	0.103	0.469	0.241	0.12	-0.016	0.733	Cytoplasm	other
MFAP2	microfibril associated protein 2	MFAP2	MFAP2	MFAP2	0.064	0.335	0.254	0.277	0.192	0.169	Extracellular Space	other
MFAP5	microfibril associated protein 5	MFAP5	MFAP5	MFAP5	0.069	0.743	0.116	0.898	0.239	0.217	Extracellular Space	other
MFGE8	milk fat globule EGF and factor V/VIII domain containing	MFGE8	MFGE8	MFGE8	0.201	0.11	0.149	0.793	0.599	0.611	Extracellular Space	other
MGST3	microsomal glutathione S-transferase 3	MGST3	MGST3	MGST3	-0.114	0.593	0.017	0.865	-0.079	0.359	Cytoplasm	enzyme
MIF	macrophage migration inhibitory factor	MIF	MIF	MIF	0.261	0.4	0.143	0.599	-0.116	0.688	Extracellular Space	cytokine	diagnosis,prognosis,response to therapy	imalumab
MINDY3	MINDY lysine 48 deubiquitinase 3	FAM188A	FAM188A	FAM188A	-0.305	0.523	0.048	0.978	-0.236	0.685	Nucleus	enzyme
MLEC	malectin	MLEC	MLEC	MLEC	-0.038	0.796	0.097	0.629	-0.165	0.475	Plasma Membrane	other
MMAB	metabolism of cobalamin associated B	MMAB	MMAB	MMAB	0.371	0.0948	0.295	0.251	0.049	0.853	Cytoplasm	enzyme
MMP2	matrix metallopeptidase 2	MMP2	MMP2	MMP2	0.242	0.309	0.261	0.472	0.377	0.217	Extracellular Space	peptidase	diagnosis,disease progression,efficacy,prognosis,response to therapy,unspecified application	marimastat,MMP2 MMP9 inhibitor,prinomastat,rebimastat
MMUT	methylmalonyl-CoA mutase	MUT	MUT	MUT	-0.131	0.352	-0.107	0.606	-0.123	0.574	Cytoplasm	enzyme		cyanocobalamin,hydroxocobalamin
MOGS	mannosyl-oligosaccharide glucosidase	MOGS	MOGS	MOGS	0.217	0.699	0.755	0.0316	0.691	0.268	Cytoplasm	enzyme
MPI	mannose phosphate isomerase	MPI	MPI	MPI	-0.08		0.092		0.113		Cytoplasm	enzyme
MPO	myeloperoxidase	MPO	MPO	MPO	-1.025		1.14		-0.388		Cytoplasm	enzyme	diagnosis,efficacy,unspecified application	AZD4831
MPST	mercaptopyruvate sulfurtransferase	MPST	MPST	MPST	-0.058	0.49	-0.021	0.895	-0.15	0.073	Cytoplasm	enzyme
MRC2	mannose receptor C type 2	MRC2	MRC2	MRC2	0.026	0.919	0.467	0.197	0.33	0.121	Plasma Membrane	transmembrane receptor
MRE11A	--	MRE11A	MRE11A	MRE11A	-0.209	0.299	0.004	0.983	-0.35	0.493	Other	other
MRPL12	mitochondrial ribosomal protein L12	MRPL12	MRPL12	MRPL12	0.029	0.861	-0.072	0.741	0.221	0.313	Cytoplasm	other
MRPL24	mitochondrial ribosomal protein L24	MRPL24	MRPL24	MRPL24	0.014	0.864	0.218	0.432	0.035	0.864	Cytoplasm	other
MSN	moesin	MSN	MSN	MSN	-0.222	0.16	-0.089	0.312	-0.059	0.642	Plasma Membrane	other
MT-CO2	cytochrome c oxidase subunit II	MT-CO2	MT-CO2	MT-CO2	-0.209	0.35	-0.114	0.7	-0.025	0.849	Cytoplasm	enzyme
MTAP	methylthioadenosine phosphorylase	MTAP	MTAP	MTAP	0.132	0.381	0.164	0.455	-0.217	0.0258	Nucleus	enzyme	efficacy,prognosis,safety
MTDH	metadherin	MTDH	MTDH	MTDH	-0.052	0.663	0.375	0.0531	0.084	0.447	Cytoplasm	transcription regulator	prognosis
MTHFD1	methylenetetrahydrofolate dehydrogenase, cyclohydrolase and formyltetrahydrofolate synthetase 1	MTHFD1	MTHFD1	MTHFD1	-0.033	0.49	-0.047	0.657	-0.127	0.116	Cytoplasm	enzyme
MTPN	myotrophin	MTPN	MTPN	MTPN	-0.215	0.197	-0.092	0.628	-0.19	0.391	Nucleus	transcription regulator
MTX1	metaxin 1	MTX1	MTX1	MTX1	0.488	0.00855	0.77	0.0444	0.487	0.0295	Cytoplasm	transporter
MUC1	mucin 1, cell surface associated	MUC1	MUC1	MUC1	-0.482	0.283	-0.159	0.753	-0.043	0.921	Plasma Membrane	other	diagnosis,disease progression,efficacy,prognosis,unspecified application	anti-CD3/MUC1 bispecific antibody,anti-TA-MUC1 antibody,epitumomab,GO-203-2C,pankomab,yttrium y 90 clivatuzumab tetraxetan
MUC4	mucin 4, cell surface associated	MUC4	MUC4	MUC4	-0.891		-0.199		-1.053		Plasma Membrane	other	diagnosis,disease progression
MUC16	mucin 16, cell surface associated	MUC16	MUC16	MUC16	-0.092		0.839		-0.265		Cytoplasm	other	diagnosis,disease progression,efficacy,prognosis,unspecified application	oregovomab,REGN4018,sofituzumab vedotin
MUC5AC	mucin 5AC, oligomeric mucus/gel-forming	MUC5AC	MUC5AC	MUC5AC	-0.277	0.0795	0.727	0.32	-0.187	0.87	Cytoplasm	peptidase	efficacy	ensituximab,GNX102
MUC5B	mucin 5B, oligomeric mucus/gel-forming	MUC5B	MUC5B	MUC5B	-0.601	0.112	-0.389	0.422	-1.062	0.0125	Extracellular Space	peptidase
MVP	major vault protein	MVP	MVP	MVP	-0.082	0.593	-0.073	0.571	-0.056	0.834	Nucleus	other
MXRA7	matrix remodeling associated 7	MXRA7	MXRA7	MXRA7	0.12	0.421	0.674	0.0669	0.199	0.327	Extracellular Space	other
MYBBP1A	MYB binding protein 1a	MYBBP1A	MYBBP1A	MYBBP1A	0.215	0.517	0.416	0.229	0.087	0.526	Nucleus	transcription regulator	unspecified application
MYDGF	myeloid derived growth factor	C19orf10	C19orf10	C19orf10	-0.132	0.181	-0.18	0.579	-0.149	0.662	Extracellular Space	cytokine
MYH9	myosin heavy chain 9	MYH9	MYH9	MYH9	-0.223	0.346	-0.078	0.644	0.046	0.792	Cytoplasm	enzyme	unspecified application
MYH10	myosin heavy chain 10	MYH10	MYH10	MYH10	-0.046	0.829	0.145	0.559	0.172	0.495	Cytoplasm	enzyme	unspecified application
MYH11	myosin heavy chain 11	MYH11	MYH11	MYH11	0.091	0.899	0.128	0.902	0.286	0.766	Cytoplasm	other
MYH14	myosin heavy chain 14	MYH14	MYH14	MYH14	-0.058	0.902	-0.05	0.903	-0.236	0.65	Extracellular Space	enzyme
MYL6	myosin light chain 6	MYL6	MYL6	MYL6	0.085	0.756	-0.024	0.962	0.209	0.638	Cytoplasm	enzyme
MYL9	myosin light chain 9	MYL9	MYL9	MYL9	0.121	0.799	0.073	0.934	0.239	0.715	Cytoplasm	other
MYL12A	myosin light chain 12A	MYL12A	MYL12A	MYL12A	-0.204	0.164	-0.149	0.294	-0.109	0.49	Cytoplasm	other	unspecified application
MYLK	myosin light chain kinase	MYLK	MYLK	MYLK	0.055	0.896	0.081	0.907	0.203	0.776	Cytoplasm	kinase	prognosis	K-252
MYO18A	myosin XVIIIA	MYO18A	MYO18A	MYO18A	0.153		0.026		-0.096		Cytoplasm	other
MYO1B	myosin IB	MYO1B	MYO1B	MYO1B	-0.478	0.188	-0.233	0.549	-0.256	0.523	Cytoplasm	enzyme
MYO1C	myosin IC	MYO1C	MYO1C	MYO1C	-0.094	0.723	0.191	0.515	0.128	0.143	Cytoplasm	enzyme
MYO1D	myosin ID	MYO1D	MYO1D	MYO1D	-0.211	0.443	-0.027	0.937	0.089	0.546	Cytoplasm	enzyme
MYO1E	myosin IE	MYO1E	MYO1E	MYO1E	-0.165	0.502	0.095	0.782	0.14	0.442	Cytoplasm	enzyme
MYOF	myoferlin	MYOF	MYOF	MYOF	-0.204	0.457	-0.036	0.864	-0.045	0.824	Nucleus	other
MZB1	marginal zone B and B1 cell specific protein	MZB1	MZB1	MZB1	-0.147	0.931	-0.844	0.359	0.05	0.979	Extracellular Space	other
NAA10	N-alpha-acetyltransferase 10, NatA catalytic subunit	NAA10	NAA10	NAA10	0.264		0.118		0.21		Nucleus	enzyme
NAA15	N-alpha-acetyltransferase 15, NatA auxiliary subunit	NAA15	NAA15	NAA15	0.109	0.557	0.607	0.208	-0.067	0.796	Nucleus	transcription regulator
NAA38	N-alpha-acetyltransferase 38, NatC auxiliary subunit	NAA38	NAA38	NAA38	0.085	0.526	0.023	0.872	-0.168	0.524	Nucleus	other
NACA	nascent polypeptide associated complex subunit alpha	NACA	NACA	NACA	0.037	0.842	-0.055	0.76	-0.032	0.884	Cytoplasm	transcription regulator
NADK2	NAD kinase 2, mitochondrial	NADKD1	NADKD1	NADKD1	-0.117	0.669	0.036	0.781	-0.184	0.244	Cytoplasm	kinase
NAE1	NEDD8 activating enzyme E1 subunit 1	NAE1	NAE1	NAE1	0.929	0.551	0.851	0.463	-0.237	0.0118	Cytoplasm	enzyme
NAGK	N-acetylglucosamine kinase	NAGK	NAGK	NAGK	-0.096	0.527	-0.079	0.551	-0.063	0.57	Cytoplasm	kinase
NAMPT	nicotinamide phosphoribosyltransferase	NAMPT	NAMPT	NAMPT	-0.066	0.638	0	1	0.204	0.0581	Extracellular Space	cytokine	diagnosis,prognosis	daporinad,KPT-9274
NANS	N-acetylneuraminate synthase	NANS	NANS	NANS	-0.188	0.327	0.066	0.714			Cytoplasm	enzyme
NAP1L1	nucleosome assembly protein 1 like 1	NAP1L1	NAP1L1	NAP1L1	0.128	0.218	-0.288	0.48	-0.051	0.852	Nucleus	other
NAP1L4	nucleosome assembly protein 1 like 4	NAP1L4	NAP1L4	NAP1L4	0.339	0.0167	0.733	0.163	0.317	0.133	Cytoplasm	other	unspecified application
NAPA	NSF attachment protein alpha	NAPA	NAPA	NAPA	0.085	0.379	0.084	0.399	0.098	0.225	Cytoplasm	transporter
NAPRT	nicotinate phosphoribosyltransferase	NAPRT1	NAPRT1	NAPRT1	-0.003	0.976	-0.255	0.514	-0.201	0.167	Cytoplasm	enzyme
NARS1	asparaginyl-tRNA synthetase 1	NARS	NARS	NARS	0.108	0.466	0.121	0.322	0.027	0.654	Cytoplasm	enzyme
NASP	nuclear autoantigenic sperm protein	NASP	NASP	NASP	0.007	0.961	0.262	0.158	0.182	0.311	Nucleus	other
NAT10	N-acetyltransferase 10	NAT10	NAT10	NAT10	0.423	0.0979	0.671	0.0121	0.273	0.174	Nucleus	enzyme
NAXD	NAD(P)HX dehydratase	CARKD	CARKD	CARKD	-0.036		-0.085		0.049		Cytoplasm	enzyme
NAXE	NAD(P)HX epimerase	APOA1BP	APOA1BP	APOA1BP	-0.032	0.849	0.461	0.372	0.293	0.527	Extracellular Space	enzyme
NCALD	neurocalcin delta	NCALD	NCALD	NCALD	-0.135		0.566		-0.02		Cytoplasm	other
NCAM1	neural cell adhesion molecule 1	NCAM1	NCAM1	NCAM1	0.465	0.141	1.216	0.122	1.032	0.319	Plasma Membrane	other	efficacy,prognosis,unspecified application	BB-10901
NCBP1	nuclear cap binding protein subunit 1	NCBP1	NCBP1	NCBP1	-0.057	0.709	0.027	0.919	0.037	0.766	Nucleus	other
NCCRP1	NCCRP1, F-box associated domain containing	NCCRP1	NCCRP1	NCCRP1	0.406	0.181	0.305	0.0179	0.235	0.102	Cytoplasm	other
NCKAP1	NCK associated protein 1	NCKAP1	NCKAP1	NCKAP1	0.037	0.77	0.173	0.325	0.072	0.452	Plasma Membrane	other
NCL	nucleolin	NCL	NCL	NCL	-0.041	0.535	0.056	0.65	-0.011	0.946	Nucleus	other		AGRO 100
NCLN	nicalin	NCLN	NCLN	NCLN	-0.062	0.695	0.094	0.701	0.223	0.379	Cytoplasm	peptidase
NDRG1	N-myc downstream regulated 1	NDRG1	NDRG1	NDRG1	-0.074	0.727	0.171	0.319	-0.046	0.858	Nucleus	kinase
NDRG2	NDRG family member 2	NDRG2	NDRG2	NDRG2	-0.153	0.169	0.042	0.824	-0.025	0.922	Cytoplasm	other
NDRG3	NDRG family member 3	NDRG3	NDRG3	NDRG3	-0.359	0.265	-0.076	0.619	-0.544	0.108	Cytoplasm	other
NDUFA2	NADH:ubiquinone oxidoreductase subunit A2	NDUFA2	NDUFA2	NDUFA2	-0.157	0.105	-0.025	0.816	0.129	0.331	Cytoplasm	enzyme
NDUFA5	NADH:ubiquinone oxidoreductase subunit A5	NDUFA5	NDUFA5	NDUFA5	-0.209	0.0716	-0.238	0.265	-0.28	0.17	Cytoplasm	enzyme
NDUFA7	NADH:ubiquinone oxidoreductase subunit A7	NDUFA7	NDUFA7	NDUFA7	0.163	0.12	0.126	0.0663	0.276	0.144	Cytoplasm	enzyme
NDUFA9	NADH:ubiquinone oxidoreductase subunit A9	NDUFA9	NDUFA9	NDUFA9	-0.002	0.994	0.291	0.543	-0.086	0.75	Cytoplasm	enzyme
NDUFA10	NADH:ubiquinone oxidoreductase subunit A10	NDUFA10	NDUFA10	NDUFA10	0.086	0.634	0.053	0.845	0.046	0.807	Cytoplasm	transporter
NDUFAB1	NADH:ubiquinone oxidoreductase subunit AB1	NDUFAB1	NDUFAB1	NDUFAB1	-0.117	0.262	0.029	0.832	0.287	0.0626	Cytoplasm	enzyme
NDUFB10	NADH:ubiquinone oxidoreductase subunit B10	NDUFB10	NDUFB10	NDUFB10	-0.014	0.93	-0.227	0.314	-0.021	0.927	Cytoplasm	enzyme
NDUFS1	NADH:ubiquinone oxidoreductase core subunit S1	NDUFS1	NDUFS1	NDUFS1	-0.106	0.345	0.051	0.752	-0.035	0.766	Cytoplasm	enzyme
NDUFS2	NADH:ubiquinone oxidoreductase core subunit S2	NDUFS2	NDUFS2	NDUFS2	-0.277	0.205	-0.13	0.759	-0.319	0.187	Cytoplasm	enzyme
NDUFS3	NADH:ubiquinone oxidoreductase core subunit S3	NDUFS3	NDUFS3	NDUFS3	-0.197	0.0714	-0.133	0.443	-0.054	0.754	Cytoplasm	enzyme
NDUFS4	NADH:ubiquinone oxidoreductase subunit S4	NDUFS4	NDUFS4	NDUFS4	-0.06	0.716	0.048	0.742	-0.046	0.803	Cytoplasm	enzyme
NDUFS6	NADH:ubiquinone oxidoreductase subunit S6	NDUFS6	NDUFS6	NDUFS6	0.179		0.512	0.252	0.935	0.327	Cytoplasm	enzyme
NDUFS7	NADH:ubiquinone oxidoreductase core subunit S7	NDUFS7	NDUFS7	NDUFS7	0.162	0.678	0.023	0.946	-0.166	0.455	Cytoplasm	enzyme
NDUFS8	NADH:ubiquinone oxidoreductase core subunit S8	NDUFS8	NDUFS8	NDUFS8	0.122	0.456	-0.221	0.268	-0.424	0.442	Cytoplasm	enzyme
NDUFV1	NADH:ubiquinone oxidoreductase core subunit V1	NDUFV1	NDUFV1	NDUFV1	-0.01	0.94	0.109	0.643	0.013	0.955	Cytoplasm	enzyme
NDUFV2	NADH:ubiquinone oxidoreductase core subunit V2	NDUFV2	NDUFV2	NDUFV2	-0.217	0.0917	-0.014	0.934	-0.142	0.313	Cytoplasm	enzyme
NEK9	NIMA related kinase 9	NEK9	NEK9	NEK9	0.325	0.335	0.171	0.29	0.109	0.854	Nucleus	kinase
NENF	neudesin neurotrophic factor	NENF	NENF	NENF	0.013	0.882	0.094	0.462	0.139	0.337	Extracellular Space	growth factor
NES	nestin	NES	NES	NES	0.206	0.14	0.204	0.152	0.118	0.55	Extracellular Space	other
NEXN	nexilin F-actin binding protein	NEXN	NEXN	NEXN	0.277	0.212	0.149	0.605	0.083	0.783	Plasma Membrane	other
NF1	neurofibromin 1	NF1	NF1	NF1	0.285	0.643	0.478	0.668	0.406	0.611	Cytoplasm	other
NFIC	nuclear factor I C	NFIC	NFIC	NFIC	-0.199	0.421	0.228	0.438	0.083	0.779	Nucleus	transcription regulator
NIBAN1	niban apoptosis regulator 1	FAM129A	FAM129A	FAM129A	-0.012	0.987	-0.104	0.426	0.961		Cytoplasm	other
NIBAN2	niban apoptosis regulator 2	FAM129B	FAM129B	FAM129B	-0.03	0.843	-0.084	0.776	-0.253	0.529	Cytoplasm	transcription regulator
NID1	nidogen 1	NID1	NID1	NID1	0.002	0.987	-0.006	0.979	0.234	0.197	Extracellular Space	other
NID2	nidogen 2	NID2	NID2	NID2	-0.013	0.928	0.088	0.754	0.098	0.674	Extracellular Space	other
NIPSNAP3A	nipsnap homolog 3A	NIPSNAP3A	NIPSNAP3A	NIPSNAP3A	-0.271	0.187	-0.17	0.632	-0.078	0.503	Nucleus	other
NIT2	nitrilase family member 2	NIT2	NIT2	NIT2	-0.012	0.952	-0.194	0.148	-0.243	0.211	Cytoplasm	enzyme
NME1	NME/NM23 nucleoside diphosphate kinase 1	NME1	NME1	NME1	-0.218	0.0705	-0.467	0.134	-0.439	0.116	Cytoplasm	kinase	unspecified application
NME2	NME/NM23 nucleoside diphosphate kinase 2	NME2	NME2	NME2					0.305		Nucleus	kinase
NME2P1	NME2 pseudogene 1	NME2P1	NME2P1	NME2P1	0.271	0.192	-0.195	0.116	-0.31	0.455	Cytoplasm	other
NMT1	N-myristoyltransferase 1	NMT1	NMT1	NMT1	0.017	0.942	0.341	0.293	0.307	0.147	Cytoplasm	enzyme
NNMT	nicotinamide N-methyltransferase	NNMT	NNMT	NNMT	0.434	0.0974	0.534	0.437	0.476	0.482	Cytoplasm	enzyme	unspecified application	atorvastatin/niacin,lovastatin/niacin,nicotinic acid,nicotinic acid/pioglitazone
NNT	nicotinamide nucleotide transhydrogenase	NNT	NNT	NNT	-0.299	0.329	-0.09	0.828	-0.209	0.445	Cytoplasm	enzyme
NOMO1 (includes others)	NODAL modulator 1	NOMO1	NOMO1	NOMO1	-0.081	0.475	0.14	0.318	0.011	0.906	Plasma Membrane	other
NONO	non-POU domain containing octamer binding	NONO	NONO	NONO	0.004	0.97	-0.015	0.902	0.054	0.692	Nucleus	transcription regulator
NOP56	NOP56 ribonucleoprotein	NOP56	NOP56	NOP56	0.023	0.861	0.263	0.385	0.082	0.559	Nucleus	other
NOP58	NOP58 ribonucleoprotein	NOP58	NOP58	NOP58	0.189	0.182	0.42	0.0221	0.02	0.816	Nucleus	enzyme
NPEPPS	aminopeptidase puromycin sensitive	NPEPPS	NPEPPS	NPEPPS	-0.099	0.393	0.067	0.322	0.075	0.322	Cytoplasm	peptidase	unspecified application
NPLOC4	NPL4 homolog, ubiquitin recognition factor	NPLOC4	NPLOC4	NPLOC4	0.003	0.977	-0.01	0.545	0.314	0.269	Nucleus	other
NPM1	nucleophosmin 1	NPM1	NPM1	NPM1	0.021	0.663	-0.109	0.492	-0.017	0.834	Nucleus	transcription regulator	disease progression,unspecified application
NPTN	neuroplastin	NPTN	NPTN	NPTN	0.155	0.43	0.362	0.67	-0.113	0.647	Plasma Membrane	other
NQO2	N-ribosyldihydronicotinamide:quinone reductase 2	NQO2	NQO2	NQO2	0.726	0.347	0.831	0.137	0.396	0.142	Cytoplasm	enzyme		caricotamide
NRP1	neuropilin 1	NRP1	NRP1	NRP1	-0.279	0.68	0.128	0.375	0.2	0.563	Plasma Membrane	transmembrane receptor	diagnosis,efficacy	vesencumab
NSF	N-ethylmaleimide sensitive factor, vesicle fusing ATPase	NSF	NSF	NSF	-0.108	0.483	-0.109	0.521	-0.011	0.918	Cytoplasm	transporter
NSFL1C	NSFL1 cofactor	NSFL1C	NSFL1C	NSFL1C	-0.054	0.628	0.163	0.0453	0.101	0.355	Cytoplasm	other
NSUN2	NOP2/Sun RNA methyltransferase 2	NSUN2	NSUN2	NSUN2	0.586	0.112	0.474	0.629	-0.581	0.298	Nucleus	enzyme
NT5E	5'-nucleotidase ecto	NT5E	NT5E	NT5E	-0.305	0.0965	0.284	0.209	0.061	0.813	Plasma Membrane	phosphatase		AB680,AK119,BMS-986179,CPI-006,GS-1423,LY3475070,MEDI9447,NZV930,TJ004309
NUCB1	nucleobindin 1	NUCB1	NUCB1	NUCB1	-0.082	0.56	-0.184	0.305	-0.092	0.465	Cytoplasm	other	diagnosis
NUCB2	nucleobindin 2	NUCB2	NUCB2	NUCB2	-0.011	0.904	-0.13	0.464	-0.086	0.617	Nucleus	other
NUCKS1	nuclear casein kinase and cyclin dependent kinase substrate 1	NUCKS1	NUCKS1	NUCKS1	-0.153	0.436	0.032	0.905	-0.105	0.51	Nucleus	kinase
NUDC	nuclear distribution C, dynein complex regulator	NUDC	NUDC	NUDC	0.066	0.47	0.08	0.405	0.115	0.442	Cytoplasm	other
NUDT5	nudix hydrolase 5	NUDT5	NUDT5	NUDT5	0.13	0.457	0.454	0.0789	0.054	0.614	Cytoplasm	phosphatase
NUDT21	nudix hydrolase 21	NUDT21	NUDT21	NUDT21	-0.096	0.402	-0.107	0.369	-0.157	0.319	Nucleus	other
NUMA1	nuclear mitotic apparatus protein 1	NUMA1	NUMA1	NUMA1	0.094	0.307	0.255	0.0261	0.206	0.268	Nucleus	other	unspecified application
NUP54	nucleoporin 54	NUP54	NUP54	NUP54	-0.097	0.665	0.453	0.271	0.132	0.362	Nucleus	other
NUP93	nucleoporin 93	NUP93	NUP93	NUP93	0.004	0.977	0.294	0.168	-0.057	0.834	Nucleus	other
NUP133	nucleoporin 133	NUP133	NUP133	NUP133	0.042	0.754	0.48	0.0658	-0.053	0.597	Nucleus	other
NUP160	nucleoporin 160	NUP160	NUP160	NUP160	-0.107	0.511	0.197	0.154	-0.075	0.695	Nucleus	other
NUP205	nucleoporin 205	NUP205	NUP205	NUP205	-0.107	0.843	0.345	0.629	0.018	0.944	Nucleus	other
OAT	ornithine aminotransferase	OAT	OAT	OAT	-0.019	0.865	0.167	0.388	0.047	0.682	Cytoplasm	enzyme
OCIAD1	OCIA domain containing 1	OCIAD1	OCIAD1	OCIAD1	0.011	0.921	0.445	0.533	0.555	0.259	Cytoplasm	other
OGDH	oxoglutarate dehydrogenase	OGDH	OGDH	OGDH	-0.091	0.317	0.012	0.833	0.096	0.352	Cytoplasm	enzyme
OGN	osteoglycin	OGN	OGN	OGN	0.301	0.391	0.11	0.853	0.399	0.414	Extracellular Space	growth factor
OLA1	Obg like ATPase 1	OLA1	OLA1	OLA1	-0.1	0.531	-0.198	0.42	-0.163	0.482	Cytoplasm	enzyme
OLFML1	olfactomedin like 1	OLFML1	OLFML1	OLFML1	0.178	0.19	0.29	0.33	0.205	0.265	Extracellular Space	other
OLFML3	olfactomedin like 3	OLFML3	OLFML3	OLFML3	0.3	0.243	0.308	0.426	0.287	0.299	Extracellular Space	other
OPA1	OPA1 mitochondrial dynamin like GTPase	OPA1	OPA1	OPA1	-0.074	0.585	0.153	0.414	-0.022	0.896	Cytoplasm	enzyme
OPTN	optineurin	OPTN	OPTN	OPTN	-0.019	0.949	0.034	0.854	-0.037	0.866	Cytoplasm	other	unspecified application
ORM1	orosomucoid 1	ORM1	ORM1	ORM1	-0.21	0.456	-0.224	0.619	-0.477	0.0609	Extracellular Space	other	unspecified application
ORM2	orosomucoid 2	ORM2	ORM2	ORM2	-0.207	0.362	-0.303	0.439	-0.268	0.302	Extracellular Space	other
OSBP	oxysterol binding protein	OSBP	OSBP	OSBP	0.285		0.208		-0.523		Cytoplasm	transporter
OSTF1	osteoclast stimulating factor 1	OSTF1	OSTF1	OSTF1	-0.272	0.414	-0.29	0.01	-0.218	0.369	Nucleus	transcription regulator
OTUB1	OTU deubiquitinase, ubiquitin aldehyde binding 1	OTUB1	OTUB1	OTUB1	-0.197	0.102	0.011	0.811	-0.2	0.475	Cytoplasm	enzyme
OXCT1	3-oxoacid CoA-transferase 1	OXCT1	OXCT1	OXCT1	-0.148	0.441	0.085	0.353	-0.333	0.431	Cytoplasm	enzyme
OXSR1	oxidative stress responsive kinase 1	OXSR1	OXSR1	OXSR1	0.266	0.149	0.153	0.354	0.006	0.946	Nucleus	kinase
P3H1	prolyl 3-hydroxylase 1	LEPRE1	LEPRE1	LEPRE1	0.142	0.451	-0.055	0.743	0.093	0.751	Nucleus	enzyme
P4HA1	prolyl 4-hydroxylase subunit alpha 1	P4HA1	P4HA1	P4HA1	0.066	0.504	0.117	0.266	0.022	0.854	Cytoplasm	enzyme	unspecified application
P4HB	prolyl 4-hydroxylase subunit beta	P4HB	P4HB	P4HB	-0.052	0.755	-0.184	0.425	-0.145	0.602	Cytoplasm	enzyme
PA2G4	proliferation-associated 2G4	PA2G4	PA2G4	PA2G4	-0.095	0.205	-0.009	0.905	-0.055	0.296	Nucleus	transcription regulator
PABPC1	poly(A) binding protein cytoplasmic 1	PABPC1	PABPC1	PABPC1	-0.043	0.726	-0.048	0.814	-0.077	0.71	Cytoplasm	translation regulator
PABPC4	poly(A) binding protein cytoplasmic 4	PABPC4	PABPC4	PABPC4	0.034	0.868	0.128	0.588	-0.069	0.791	Cytoplasm	translation regulator
PABPN1	poly(A) binding protein nuclear 1	PABPN1	PABPN1	PABPN1	-0.027	0.789	0.012	0.924	0.042	0.701	Nucleus	enzyme
PACSIN2	protein kinase C and casein kinase substrate in neurons 2	PACSIN2	PACSIN2	PACSIN2	-0.025	0.818	0.138	0.38	0.147	0.368	Cytoplasm	transporter
PACSIN3	protein kinase C and casein kinase substrate in neurons 3	PACSIN3	PACSIN3	PACSIN3	0.129	0.632	0.776	0.588	0.538	0.631	Cytoplasm	other
PAFAH1B1	platelet activating factor acetylhydrolase 1b regulatory subunit 1	PAFAH1B1	PAFAH1B1	PAFAH1B1	-0.079	0.609	-0.046	0.592	-0.141	0.551	Cytoplasm	enzyme
PAFAH1B3	platelet activating factor acetylhydrolase 1b catalytic subunit 3	PAFAH1B3	PAFAH1B3	PAFAH1B3	-0.048	0.825	0.418	0.124	0.087	0.368	Cytoplasm	enzyme
PAICS	phosphoribosylaminoimidazole carboxylase and phosphoribosylaminoimidazolesuccinocarboxamide synthase	PAICS	PAICS	PAICS	-0.047	0.626	0.057	0.558	-0.019	0.787	Cytoplasm	enzyme
PAIP1	poly(A) binding protein interacting protein 1	PAIP1	PAIP1	PAIP1	-0.079	0.77	0.117	0.515	-0.358	0.56	Cytoplasm	translation regulator
PAK2	p21 (RAC1) activated kinase 2	PAK2	PAK2	PAK2	-0.133	0.523	0.045	0.853	-0.059	0.802	Cytoplasm	kinase
PALLD	palladin, cytoskeletal associated protein	PALLD	PALLD	PALLD	-0.01	0.963	0.086	0.756	0.272	0.46	Plasma Membrane	other
PALM	paralemmin	PALM	PALM	PALM	0.057	0.515	0.239	0.163	0.199	0.341	Plasma Membrane	other
PARK7	Parkinsonism associated deglycase	PARK7	PARK7	PARK7	-0.022	0.626	-0.052	0.511	0.011	0.922	Nucleus	enzyme	diagnosis
PARP1	poly(ADP-ribose) polymerase 1	PARP1	PARP1	PARP1	-0.074	0.399	0.148	0.249	0.091	0.361	Nucleus	enzyme	diagnosis,efficacy,prognosis	2X-121,[18F]fluorthanatrace,ABT-767,bevacizumab/olaparib,CEP-9722,fluzoparib,IDX-1197,niraparib,olaparib,poly ADP ribose polymerase 1 inhibitor,rucaparib,SC10914,senaparib,simmiparib,talazoparib,veliparib
PARVA	parvin alpha	PARVA	PARVA	PARVA	-0.124	0.475	0.031	0.839	0.156	0.253	Cytoplasm	other
PAWR	pro-apoptotic WT1 regulator	PAWR	PAWR	PAWR	0.115	0.701	-0.092	0.755	-0.008	0.979	Nucleus	transcription regulator	prognosis
PBDC1	polysaccharide biosynthesis domain containing 1	PBDC1	PBDC1	PBDC1	0.071	0.754	0.003	0.986	0.195	0.476	Other	other
PBXIP1	PBX homeobox interacting protein 1	PBXIP1	PBXIP1	PBXIP1	0.416		0.621	0.0415	0.328	0.205	Nucleus	transcription regulator
PCBP1	poly(rC) binding protein 1	PCBP1	PCBP1	PCBP1	0.01	0.875	-0.109	0.308	0.045	0.705	Nucleus	translation regulator
PCBP2	poly(rC) binding protein 2	PCBP2	PCBP2	PCBP2	-0.099	0.397	-0.164	0.232	0.101	0.575	Nucleus	other
PCCA	propionyl-CoA carboxylase subunit alpha	PCCA	PCCA	PCCA	0.086	0.389	0.171	0.43	0.058	0.502	Cytoplasm	enzyme
PCCB	propionyl-CoA carboxylase subunit beta	PCCB	PCCB	PCCB	-0.38	0.0975	-0.315	0.437	-0.233	0.445	Cytoplasm	enzyme
PCK2	phosphoenolpyruvate carboxykinase 2, mitochondrial	PCK2	PCK2	PCK2	-0.363	0.519	0.059	0.906	-0.286	0.531	Cytoplasm	kinase
PCMT1	protein-L-isoaspartate (D-aspartate) O-methyltransferase	PCMT1	PCMT1	PCMT1	0.01	0.901	0.027	0.452	-0.011	0.91	Cytoplasm	enzyme
PCNA	proliferating cell nuclear antigen	PCNA	PCNA	PCNA	-0.028	0.899	0.482	0.136	0.185	0.242	Nucleus	enzyme	efficacy,prognosis,response to therapy
PCOLCE	procollagen C-endopeptidase enhancer	PCOLCE	PCOLCE	PCOLCE	0.211	0.115	0.061	0.69	0.191	0.105	Extracellular Space	other
PCYOX1	prenylcysteine oxidase 1	PCYOX1	PCYOX1	PCYOX1	-0.055	0.58	0.036	0.854	-0.057	0.487	Cytoplasm	enzyme
PCYT1A	phosphate cytidylyltransferase 1, choline, alpha	PCYT1A	PCYT1A	PCYT1A	-0.055	0.761	0.144	0.691	-0.191	0.628	Cytoplasm	enzyme
PDAP1	PDGFA associated protein 1	PDAP1	PDAP1	PDAP1	0.15	0.206	0.356	0.0423	0.169	0.147	Cytoplasm	other
PDCD4	programmed cell death 4	PDCD4	PDCD4	PDCD4	0.136	0.332	0.194	0.394	0.137	0.495	Nucleus	other	prognosis
PDCD5	programmed cell death 5	PDCD5	PDCD5	PDCD5	-0.006	0.937	0.209	0.157	0.196	0.0151	Nucleus	other
PDCD6	programmed cell death 6	PDCD6	PDCD6	PDCD6	0.016	0.857	0.018	0.81	0.076	0.582	Cytoplasm	other
PDCD6IP	programmed cell death 6 interacting protein	PDCD6IP	PDCD6IP	PDCD6IP	-0.057	0.533	0.007	0.952	-0.068	0.591	Cytoplasm	other
PDGFRB	platelet derived growth factor receptor beta	PDGFRB	PDGFRB	PDGFRB	-0.327	0.354	0.386	0.112	-0.23	0.162	Plasma Membrane	kinase	prognosis,response to therapy,unspecified application	5-azacytidine/midostaurin,5-azacytidine/sorafenib,afatinib/dasatinib,axitinib,becaplermin,bevacizumab/sorafenib,blinatumomab/dasatinib,blinatumomab/imatinib,bortezomib/sorafenib,bosutinib/imatinib,clofarabine/cytarabine/sorafenib,crizotinib/pazopanib,cytarabine/idarubicin/sorafenib,dasatinib,dasatinib/erlotinib,dasatinib/filgrastim,dasatinib/inotuzumab ozogamicin,dasatinib/nilotinib,dasatinib/rit…
PDHA1	pyruvate dehydrogenase E1 subunit alpha 1	PDHA1	PDHA1	PDHA1	-0.074	0.593	0.038	0.817	0.002	0.989	Cytoplasm	enzyme	unspecified application
PDHB	pyruvate dehydrogenase E1 subunit beta	PDHB	PDHB	PDHB	-0.077	0.54	-0.146	0.4	-0.017	0.913	Cytoplasm	enzyme	unspecified application
PDIA3	protein disulfide isomerase family A member 3	PDIA3	PDIA3	PDIA3	-0.102	0.529	-0.153	0.438	-0.103	0.635	Cytoplasm	peptidase	diagnosis
PDIA4	protein disulfide isomerase family A member 4	PDIA4	PDIA4	PDIA4	-0.17	0.228	-0.257	0.299	-0.206	0.41	Cytoplasm	enzyme
PDIA6	protein disulfide isomerase family A member 6	PDIA6	PDIA6	PDIA6	-0.091	0.504	-0.036	0.792	-0.106	0.623	Cytoplasm	enzyme
PDLIM1	PDZ and LIM domain 1	PDLIM1	PDLIM1	PDLIM1	-0.088	0.691	-0.161	0.505	-0.175	0.64	Cytoplasm	transcription regulator	unspecified application
PDLIM4	PDZ and LIM domain 4	PDLIM4	PDLIM4	PDLIM4	-0.092	0.485	0.245	0.473	0.227	0.507	Plasma Membrane	other	diagnosis
PDLIM5	PDZ and LIM domain 5	PDLIM5	PDLIM5	PDLIM5	-0.034	0.893	0.201	0.542	0.201	0.139	Cytoplasm	other	unspecified application
PDLIM7	PDZ and LIM domain 7	PDLIM7	PDLIM7	PDLIM7	0.074	0.714	0.212	0.579	0.288	0.437	Cytoplasm	other	unspecified application
PDPR	pyruvate dehydrogenase phosphatase regulatory subunit	PDPR	PDPR	PDPR	-0.066	0.744	0.052	0.884	0.116	0.179	Cytoplasm	enzyme
PDS5B	PDS5 cohesin associated factor B	PDS5B	PDS5B	PDS5B	0.104	0.501	0.42	0.137	-0.048	0.747	Nucleus	other	diagnosis,disease progression
PDXK	pyridoxal kinase	PDXK	PDXK	PDXK	-0.286	0.268	0.333	0.0123	-0.343	0.566	Cytoplasm	kinase
PEA15	proliferation and apoptosis adaptor protein 15	PEA15	PEA15	PEA15	0.104	0.185	0.19	0.12	0.123	0.299	Cytoplasm	transporter	prognosis
PEBP1	phosphatidylethanolamine binding protein 1	PEBP1	PEBP1	PEBP1	-0.029	0.698	-0.113	0.489	-0.146	0.199	Cytoplasm	other	unspecified application
PFDN2	prefoldin subunit 2	PFDN2	PFDN2	PFDN2	-0.233	0.269	0.022	0.484	0.07	0.627	Cytoplasm	other
PFDN5	prefoldin subunit 5	PFDN5	PFDN5	PFDN5	-0.106	0.126	-0.049	0.75	-0.253	0.516	Nucleus	transcription regulator
PFDN6	prefoldin subunit 6	PFDN6	PFDN6	PFDN6	-0.044	0.481	-0.056	0.847	0.16	0.339	Cytoplasm	other
PFKL	phosphofructokinase, liver type	PFKL	PFKL	PFKL	0.058	0.641	0.212	0.278	0.123	0.0772	Cytoplasm	kinase
PFKM	phosphofructokinase, muscle	PFKM	PFKM	PFKM	-0.224	0.546	-0.057	0.675	0.006	0.894	Cytoplasm	kinase	unspecified application
PFKP	phosphofructokinase, platelet	PFKP	PFKP	PFKP	0.084	0.627	0.14	0.0924	0.128	0.644	Cytoplasm	kinase
PFN1	profilin 1	PFN1	PFN1	PFN1	-0.137	0.102	-0.173	0.281	-0.103	0.478	Cytoplasm	other	unspecified application
PGAM1	phosphoglycerate mutase 1	PGAM1	PGAM1	PGAM1	0.031	0.833	0.084	0.355	-0.021	0.786	Cytoplasm	phosphatase
PGD	phosphogluconate dehydrogenase	PGD	PGD	PGD	-0.007	0.978	0.086	0.517	-0.154	0.478	Cytoplasm	enzyme
PGK1	phosphoglycerate kinase 1	PGK1	PGK1	PGK1	0.015	0.838	-0.107	0.583	-0.146	0.377	Cytoplasm	kinase
PGLS	6-phosphogluconolactonase	PGLS	PGLS	PGLS	0.002	0.986	-0.035	0.828	0.037	0.78	Cytoplasm	enzyme
PGM1	phosphoglucomutase 1	PGM1	PGM1	PGM1	-0.082	0.494	-0.174	0.279	-0.093	0.476	Cytoplasm	enzyme
PGM2	phosphoglucomutase 2	PGM2	PGM2	PGM2	-0.091	0.581	-0.005	0.96	-0.03	0.821	Cytoplasm	enzyme
PGM5	phosphoglucomutase 5	PGM5	PGM5	PGM5	-0.051	0.914	0.298	0.711	0.332	0.691	Cytoplasm	enzyme
PGRMC1	progesterone receptor membrane component 1	PGRMC1	PGRMC1	PGRMC1	0.118	0.585	0.716	0.0894	0.385	0.341	Plasma Membrane	transmembrane receptor		CT1812
PGRMC2	progesterone receptor membrane component 2	PGRMC2	PGRMC2	PGRMC2	0.165	0.672	0.459	0.393	0.335	0.175	Nucleus	other
PHB2	prohibitin 2	PHB2	PHB2	PHB2	-0.101	0.245	-0.052	0.707	0.064	0.702	Cytoplasm	transcription regulator
PHB	prohibitin	PHB	PHB	PHB	-0.026	0.715	-0.059	0.655	-0.005	0.971	Nucleus	transcription regulator	diagnosis	prohibitin-targeting peptide 1
PHGDH	phosphoglycerate dehydrogenase	PHGDH	PHGDH	PHGDH	0.11	0.385	0.08	0.68	-0.13	0.251	Cytoplasm	enzyme
PHLDB1	pleckstrin homology like domain family B member 1	PHLDB1	PHLDB1	PHLDB1	0.241	0.441	0.767	0.181	0.544	0.375	Cytoplasm	other
PHPT1	phosphohistidine phosphatase 1	PHPT1	PHPT1	PHPT1	0.028	0.808	0.066	0.382	-0.007	0.942	Cytoplasm	phosphatase
PHYHD1	phytanoyl-CoA dioxygenase domain containing 1	PHYHD1	PHYHD1	PHYHD1	0.107	0.0271	0.286	0.442	-0.163	0.576	Other	other
PI3	peptidase inhibitor 3	PI3	PI3	PI3	0.004		-0.072		0.607		Extracellular Space	other
PICALM	phosphatidylinositol binding clathrin assembly protein	PICALM	PICALM	PICALM	-0.051	0.752	-0.073	0.712	0.009	0.957	Cytoplasm	other
PIGR	polymeric immunoglobulin receptor	PIGR	PIGR	PIGR	-1.191	0.0669	-0.674	0.134	-1.128	0.147	Plasma Membrane	transporter	unspecified application
PITPNA	phosphatidylinositol transfer protein alpha	PITPNA	PITPNA	PITPNA	0.028	0.809	-0.225	0.251	-0.146	0.398	Cytoplasm	transporter	diagnosis
PITPNB	phosphatidylinositol transfer protein beta	PITPNB	PITPNB	PITPNB	0.321	0.0973	0.249	0.318	0.052	0.0657	Cytoplasm	transporter
PITRM1	pitrilysin metallopeptidase 1	PITRM1	PITRM1	PITRM1	-0.107	0.706	0.254	0.0369	0.006	0.969	Cytoplasm	peptidase
PKM	pyruvate kinase M1/2	PKM	PKM	PKM	-0.082	0.63	-0.036	0.848	-0.139	0.588	Cytoplasm	kinase	unspecified application	CAP-232
PKP1	plakophilin 1	PKP1	PKP1	PKP1	-0.197	0.803	0.13	0.278	0.045	0.885	Plasma Membrane	other
PKP3	plakophilin 3	PKP3	PKP3	PKP3	0.02	0.967	0.546	0.15	0.276	0.59	Plasma Membrane	other
PLA2G4D	phospholipase A2 group IVD	PLA2G4D	PLA2G4D	PLA2G4D	0.863		0.059		-0.422		Cytoplasm	enzyme
PLAC9	placenta associated 9	PLAC9	PLAC9	PLAC9	0.295	0.0438	0.328	0.39	0.21	0.139	Other	other
PLCD1	phospholipase C delta 1	PLCD1	PLCD1	PLCD1	0.43	0.39	-0.189	0.461	-0.17	0.347	Cytoplasm	enzyme
PLEC	plectin	PLEC	PLEC	PLEC	-0.126	0.361	0.02	0.789	-0.033	0.744	Cytoplasm	other	unspecified application
PLEKHO2	pleckstrin homology domain containing O2	PLEKHO2	PLEKHO2	PLEKHO2	0.093		0.068	0.86	0.01	0.796	Cytoplasm	other
PLG	plasminogen	PLG	PLG	PLG	0.058	0.506	0.182	0.569	0.19	0.532	Extracellular Space	peptidase	diagnosis,unspecified application	6-aminocaproic acid,aprotinin,PLAT,reteplase,tenecteplase,tranexamic acid
PLIN3	perilipin 3	PLIN3	PLIN3	PLIN3	0.037	0.766	0.026	0.764	0.015	0.894	Cytoplasm	other
PLPBP	pyridoxal phosphate binding protein	PROSC	PROSC	PROSC	-0.112	0.415	0.114	0.588	-0.089	0.707	Cytoplasm	enzyme
PLS3	plastin 3	PLS3	PLS3	PLS3	-0.072	0.699	0.066	0.408	-0.134	0.606	Cytoplasm	other
PLTP	phospholipid transfer protein	PLTP	PLTP	PLTP	0.117	0.83	1.019	0.113	0.729	0.25	Extracellular Space	enzyme
PLXNB2	plexin B2	PLXNB2	PLXNB2	PLXNB2	0.047	0.78	0.168	0.605	-0.151	0.343	Plasma Membrane	transmembrane receptor
PM20D2	peptidase M20 domain containing 2	PM20D2	PM20D2	PM20D2	0.344	0.0989	0.285	0.729	-0.101	0.377	Nucleus	peptidase
PML	promyelocytic leukemia	PML	PML	PML	-0.053	0.689	0.037	0.803	-0.014	0.945	Nucleus	transcription regulator		arsenic trioxide
PNN	pinin, desmosome associated protein	PNN	PNN	PNN	0.034	0.552	0.129	0.207	-0.057	0.525	Plasma Membrane	other
PNP	purine nucleoside phosphorylase	PNP	PNP	PNP	0.079	0.451	0.023	0.801	0.121	0.457	Nucleus	enzyme		forodesine,PD 141955,purine nucleoside phosphorylase inhibitor
PNPO	pyridoxamine 5'-phosphate oxidase	PNPO	PNPO	PNPO	-0.137	0.496	0.203	0.442	0.048	0.851	Cytoplasm	enzyme	unspecified application
PODN	podocan	PODN	PODN	PODN	0.316	0.0518	-0.113	0.661	0.158	0.122	Cytoplasm	other
PODXL	podocalyxin like	PODXL	PODXL	PODXL	0.119	0.891	0.329	0.135	-0.359	0.682	Plasma Membrane	kinase
POF1B	POF1B actin binding protein	POF1B	POF1B	POF1B	0.046	0.791	-0.213	0.375	-0.397	0.493	Plasma Membrane	other
POFUT1	protein O-fucosyltransferase 1	POFUT1	POFUT1	POFUT1	0.247	0.203	0.18	0.27	-0.16	0.154	Cytoplasm	enzyme
POGLUT1	protein O-glucosyltransferase 1	POGLUT1	POGLUT1	POGLUT1	-0.063	0.734	0.139	0.688	0.236	0.387	Extracellular Space	enzyme
POLR2A	RNA polymerase II subunit A	POLR2A	POLR2A	POLR2A	0.068		0.704		0.169		Nucleus	enzyme
POLR2C	RNA polymerase II subunit C	POLR2C	POLR2C	POLR2C	-0.093	0.8	0.46	0.275	-0.003	0.979	Nucleus	enzyme
POLR2E	RNA polymerase II subunit E	POLR2E	POLR2E	POLR2E	0.308	0.575	-0.017	0.932	0.053	0.91	Nucleus	enzyme
PON1	paraoxonase 1	PON1	PON1	PON1	-0.76	0.0567	-0.051	0.897	-0.498	0.219	Extracellular Space	phosphatase	efficacy,unspecified application
POR	cytochrome p450 oxidoreductase	POR	POR	POR	0.154	0.609	0.449	0.32	0.165	0.57	Cytoplasm	enzyme		carboplatin/doxorubicin,cisplatin/doxorubicin,cisplatin/doxorubicin/ifosfamide,cisplatin/doxorubicin/ifosfamide/methotrexate,cisplatin/doxorubicin/methotrexate,dacarbazine/doxorubicin,dacarbazine/doxorubicin/ifosfamide,daunorubicin,daunorubicin/tretinoin,doxorubicin,doxorubicin/ifosfamide,doxorubicin/streptozocin,doxorubicin/tretinoin,nitazoxanide,nitazoxanide/peginterferon alfa-2a/ribavirin
POSTN	periostin	POSTN	POSTN	POSTN	0.092	0.797	0.059	0.79	0.014	0.909	Extracellular Space	other	unspecified application
PPA1	inorganic pyrophosphatase 1	PPA1	PPA1	PPA1	-0.004	0.969	0.218	0.0672	0.101	0.481	Cytoplasm	enzyme
PPA2	inorganic pyrophosphatase 2	PPA2	PPA2	PPA2	-0.053	0.482	0.058	0.485	0.046	0.67	Cytoplasm	enzyme
PPFIBP1	PPFIA binding protein 1	PPFIBP1	PPFIBP1	PPFIBP1	0.149	0.213	0.408	0.0595	0.211	0.182	Plasma Membrane	other
PPIA	peptidylprolyl isomerase A	PPIA	PPIA	PPIA	-0.031	0.759	-0.164	0.271	-0.15	0.346	Cytoplasm	enzyme		alemtuzumab/cyclosporin A,basiliximab/cyclosporine,cyclosporin A,cyclosporin A/methotrexate,cyclosporine A/sirolimus/tacrolimus,cyclosporine A/tacrolimus,N-methyl-4-Ile-cyclosporin
PPIB	peptidylprolyl isomerase B	PPIB	PPIB	PPIB	-0.103	0.366	-0.185	0.291	-0.066	0.731	Cytoplasm	enzyme
PPIL4	peptidylprolyl isomerase like 4	PPIL4	PPIL4	PPIL4	0.261	0.246	0.427	0.223	0.122	0.524	Nucleus	enzyme
PPL	periplakin	PPL	PPL	PPL	0.212	0.662	0.181	0.563	-0.052	0.927	Cytoplasm	other	diagnosis
PPM1A	protein phosphatase, Mg2+/Mn2+ dependent 1A	PPM1A	PPM1A	PPM1A	0.202	0.672	0.371	0.592	-0.452	0.704	Cytoplasm	phosphatase
PPP1CA	protein phosphatase 1 catalytic subunit alpha	PPP1CA	PPP1CA	PPP1CA	0.034	0.893	0.021	0.926	0.025	0.926	Cytoplasm	phosphatase
PPP1CB	protein phosphatase 1 catalytic subunit beta	PPP1CB	PPP1CB	PPP1CB	-0.058	0.651	0.078	0.36	0.04	0.577	Cytoplasm	phosphatase
PPP1CC	protein phosphatase 1 catalytic subunit gamma	PPP1CC	PPP1CC	PPP1CC	0.196		-0.009		-0.03		Nucleus	phosphatase
PPP1R7	protein phosphatase 1 regulatory subunit 7	PPP1R7	PPP1R7	PPP1R7	0.017	0.883	0.036	0.768	-0.036	0.777	Nucleus	phosphatase
PPP1R21	protein phosphatase 1 regulatory subunit 21	PPP1R21	PPP1R21	PPP1R21	0.03	0.878	0.231	0.428	0.208	0.384	Other	other
PPP1R12A	protein phosphatase 1 regulatory subunit 12A	PPP1R12A	PPP1R12A	PPP1R12A	0.019	0.908	0.099	0.623	0.18	0.422	Cytoplasm	phosphatase
PPP1R12C	protein phosphatase 1 regulatory subunit 12C	PPP1R12C	PPP1R12C	PPP1R12C	-0.166	0.353	0.521	0.417	0.257	0.424	Cytoplasm	phosphatase
PPP1R9B	protein phosphatase 1 regulatory subunit 9B	PPP1R9B	PPP1R9B	PPP1R9B	0.42	0.0602	0.335	0.304	0.318	0.162	Cytoplasm	enzyme
PPP2CA	protein phosphatase 2 catalytic subunit alpha	PPP2CA	PPP2CA	PPP2CA	-0.139	0.525	-0.299	0.227	-0.056	0.87	Cytoplasm	phosphatase
PPP2CB	protein phosphatase 2 catalytic subunit beta	PPP2CB	PPP2CB	PPP2CB	-0.34		-0.35		-0.367		Cytoplasm	phosphatase
PPP2R1A	protein phosphatase 2 scaffold subunit Aalpha	PPP2R1A	PPP2R1A	PPP2R1A	-0.051	0.616	0.058	0.597	0.007	0.945	Cytoplasm	phosphatase
PPP3CA	protein phosphatase 3 catalytic subunit alpha	PPP3CA	PPP3CA	PPP3CA	0.39	0.193	0.896	0.0412	0.421	0.0867	Cytoplasm	phosphatase		cyclosporin A,cyclosporin A/methotrexate,methylprednisolone/tacrolimus,pimecrolimus,prednisone/tacrolimus,tacrolimus,voclosporin
PPP3R1	protein phosphatase 3 regulatory subunit B, alpha	PPP3R1	PPP3R1	PPP3R1	-0.009	0.915	0.027	0.87	0.23	0.392	Cytoplasm	phosphatase		cyclosporin A,cyclosporin A/methotrexate
PPP5C	protein phosphatase 5 catalytic subunit	PPP5C	PPP5C	PPP5C	-0.079		-0.438		-0.035		Nucleus	phosphatase
PRCP	prolylcarboxypeptidase	PRCP	PRCP	PRCP	0.425		0.342		0.496		Cytoplasm	peptidase
PRDX1	peroxiredoxin 1	PRDX1	PRDX1	PRDX1	-0.13	0.156	-0.134	0.126	-0.09	0.399	Cytoplasm	enzyme	diagnosis
PRDX2	peroxiredoxin 2	PRDX2	PRDX2	PRDX2	-0.027	0.664	0.071	0.231	0.04	0.716	Cytoplasm	enzyme
PRDX3	peroxiredoxin 3	PRDX3	PRDX3	PRDX3	-0.104	0.326	-0.023	0.912	0.061	0.778	Cytoplasm	enzyme	diagnosis
PRDX4	peroxiredoxin 4	PRDX4	PRDX4	PRDX4	-0.528	0.0258	-0.567	0.0674	-0.32	0.347	Cytoplasm	enzyme
PRDX5	peroxiredoxin 5	PRDX5	PRDX5	PRDX5	-0.096	0.34	-0.161	0.594	-0.176	0.481	Cytoplasm	enzyme	unspecified application	auranofin
PRDX6	peroxiredoxin 6	PRDX6	PRDX6	PRDX6	-0.064	0.488	0.048	0.6	0.011	0.952	Cytoplasm	enzyme	unspecified application
PRELP	proline and arginine rich end leucine rich repeat protein	PRELP	PRELP	PRELP	0.101	0.725	0.009	0.987	0.213	0.593	Extracellular Space	other
PREP	prolyl endopeptidase	PREP	PREP	PREP	-0.008	0.959	0.337	0.0114	0.144	0.235	Cytoplasm	peptidase		Z 321
PRKAA1	protein kinase AMP-activated catalytic subunit alpha 1	PRKAA1	PRKAA1	PRKAA1	0.404		0.466		0.147		Cytoplasm	kinase		phenformin
PRKACA	protein kinase cAMP-activated catalytic subunit alpha	PRKACA	PRKACA	PRKACA	-0.263	0.0877	-0.083	0.654	-0.232	0.0491	Cytoplasm	kinase
PRKAG1	protein kinase AMP-activated non-catalytic subunit gamma 1	PRKAG1	PRKAG1	PRKAG1	0.239	0.235	-0.02	0.911	-0.002	0.994	Nucleus	kinase
PRKAR1A	protein kinase cAMP-dependent type I regulatory subunit alpha	PRKAR1A	PRKAR1A	PRKAR1A	0.121	0.0349	-0.001	0.987	-0.009	0.814	Cytoplasm	kinase
PRKAR2A	protein kinase cAMP-dependent type II regulatory subunit alpha	PRKAR2A	PRKAR2A	PRKAR2A	-0.016	0.835	0.031	0.763	-0.032	0.684	Cytoplasm	kinase
PRKAR2B	protein kinase cAMP-dependent type II regulatory subunit beta	PRKAR2B	PRKAR2B	PRKAR2B	-0.21	0.309	-0.271	0.0317	-0.23	0.326	Cytoplasm	kinase
PRKCA	protein kinase C alpha	PRKCA	PRKCA	PRKCA	0.754	0.294	1.639	0.454	1.379	0.374	Cytoplasm	kinase		aprinocarsen,ingenol mebutate,L-threo-safingol,midostaurin
PRKCSH	protein kinase C substrate 80K-H	PRKCSH	PRKCSH	PRKCSH	-0.081	0.483	-0.067	0.573	0.025	0.811	Cytoplasm	enzyme
PRKDC	protein kinase, DNA-activated, catalytic subunit	PRKDC	PRKDC	PRKDC	-0.042	0.582	0.058	0.63	0.022	0.8	Nucleus	kinase		BR101801,CC-115,nedisertib,panulisib
PRKG1	protein kinase cGMP-dependent 1	PRKG1	PRKG1	PRKG1	-0.024	0.885	0.011	0.969	0.143	0.669	Cytoplasm	kinase
PRMT1	protein arginine methyltransferase 1	PRMT1	PRMT1	PRMT1	-0.224	0.241	-0.236	0.36	-0.202	0.265	Nucleus	enzyme		GSK3368715
PRPF6	pre-mRNA processing factor 6	PRPF6	PRPF6	PRPF6	0.007	0.94	0.212	0.269	0.164	0.45	Nucleus	transcription regulator
PRPF8	pre-mRNA processing factor 8	PRPF8	PRPF8	PRPF8	-0.251	0.19	-0.123	0.276	0.019	0.802	Nucleus	other
PRPF19	pre-mRNA processing factor 19	PRPF19	PRPF19	PRPF19	0.003	0.963	0.087	0.492	0.194	0.093	Nucleus	enzyme
PRPF40A	pre-mRNA processing factor 40 homolog A	PRPF40A	PRPF40A	PRPF40A	0.179	0.707	-0.18	0.588	-0.257	0.279	Nucleus	other
PRPF4B	pre-mRNA processing factor 4B	PRPF4B	PRPF4B	PRPF4B	0.013	0.95	0.142	0.481	0.294	0.146	Nucleus	kinase
PRPH	peripherin	PRPH	PRPH	PRPH	-0.341	0.188	-0.402	0.526	-0.237	0.632	Plasma Membrane	other
PRPS1	phosphoribosyl pyrophosphate synthetase 1	PRPS1	PRPS1	PRPS1	0.24		0.376		-0.031		Cytoplasm	kinase
PRPS2	phosphoribosyl pyrophosphate synthetase 2	PRPS2	PRPS2	PRPS2	-0.493		0.26		-0.59		Cytoplasm	kinase
PRRC2C	proline rich coiled-coil 2C	PRRC2C	PRRC2C	PRRC2C	0.071	0.744	0.178	0.363	0.154	0.404	Cytoplasm	other
PRXL2A	peroxiredoxin like 2A	FAM213A	FAM213A	FAM213A	-0.292	0.247	0.033	0.883	-0.115	0.63	Extracellular Space	other
PSAP	prosaposin	PSAP	PSAP	PSAP	-0.174	0.0779	-0.144	0.438	-0.233	0.448	Extracellular Space	enzyme	unspecified application
PSIP1	PC4 and SFRS1 interacting protein 1	PSIP1	PSIP1	PSIP1	-0.176	0.141	-0.038	0.823	0.021	0.936	Nucleus	transcription regulator	disease progression
PSMA1	proteasome 20S subunit alpha 1	PSMA1	PSMA1	PSMA1	0.008	0.923	0.013	0.911	-0.044	0.554	Cytoplasm	peptidase
PSMA3	proteasome 20S subunit alpha 3	PSMA3	PSMA3	PSMA3	-0.037	0.794	0.12	0.505	-0.039	0.816	Cytoplasm	peptidase
PSMA4	proteasome 20S subunit alpha 4	PSMA4	PSMA4	PSMA4	-0.109	0.328	-0.159	0.396	-0.177	0.253	Cytoplasm	peptidase
PSMA5	proteasome 20S subunit alpha 5	PSMA5	PSMA5	PSMA5	-0.065	0.418	0.001	0.993	-0.061	0.552	Cytoplasm	peptidase
PSMA6	proteasome 20S subunit alpha 6	PSMA6	PSMA6	PSMA6	-0.103	0.192	-0.062	0.504	-0.035	0.726	Cytoplasm	peptidase
PSMA7	proteasome 20S subunit alpha 7	PSMA7	PSMA7	PSMA7	0.029	0.791	-0.082	0.601	-0.096	0.493	Cytoplasm	peptidase
PSMB1	proteasome 20S subunit beta 1	PSMB1	PSMB1	PSMB1	-0.109	0.207	-0.053	0.615	-0.068	0.435	Cytoplasm	peptidase		bortezomib,bortezomib/cladribine/rituximab,bortezomib/dexamethasone,bortezomib/dexamethasone/doxorubicin,bortezomib/dexamethasone/lenalidomide,bortezomib/dexamethasone/pomalidomide,bortezomib/dexamethasone/rituximab,bortezomib/dexamethasone/thalidomide,bortezomib/doxorubicin,bortezomib/fulvestrant,bortezomib/lenalidomide,bortezomib/paclitaxel,bortezomib/prednisone,bortezomib/rituximab,bortezomib/…
PSMB3	proteasome 20S subunit beta 3	PSMB3	PSMB3	PSMB3	0.019	0.891	-0.176	0.0653	-0.225	0.325	Cytoplasm	peptidase
PSMB4	proteasome 20S subunit beta 4	PSMB4	PSMB4	PSMB4	0.001	0.997	0.155	0.0936	0.072	0.457	Cytoplasm	peptidase
PSMB6	proteasome 20S subunit beta 6	PSMB6	PSMB6	PSMB6	-0.11	0.524	-0.21	0.16	-0.148	0.209	Nucleus	peptidase
PSMB7	proteasome 20S subunit beta 7	PSMB7	PSMB7	PSMB7	-0.155	0.288	0.112	0.301	-0.165	0.125	Cytoplasm	peptidase
PSMB8	proteasome 20S subunit beta 8	PSMB8	PSMB8	PSMB8	-0.005	0.978	0.155	0.362	0.075	0.601	Cytoplasm	peptidase		carfilzomib,carfilzomib/dexamethasone,carfilzomib/dexamethasone/lenalidomide,carfilzomib/dexamethasone/rituximab
PSMB10	proteasome 20S subunit beta 10	PSMB10	PSMB10	PSMB10	0.396	0.283	0.535	0.201	0.478	0.121	Cytoplasm	peptidase		carfilzomib,carfilzomib/dexamethasone,carfilzomib/dexamethasone/lenalidomide,carfilzomib/dexamethasone/rituximab
PSMC1	proteasome 26S subunit, ATPase 1	PSMC1	PSMC1	PSMC1	-0.148	0.461	-0.091	0.196	0.025	0.855	Nucleus	peptidase
PSMC2	proteasome 26S subunit, ATPase 2	PSMC2	PSMC2	PSMC2	-0.008	0.935	0.04	0.318	0.007	0.941	Nucleus	peptidase
PSMC3	proteasome 26S subunit, ATPase 3	PSMC3	PSMC3	PSMC3	-0.08	0.39	-0.08	0.615	-0.116	0.506	Nucleus	enzyme
PSMC4	proteasome 26S subunit, ATPase 4	PSMC4	PSMC4	PSMC4	-0.155	0.145	-0.202	0.551	-0.134	0.605	Nucleus	peptidase
PSMC5	proteasome 26S subunit, ATPase 5	PSMC5	PSMC5	PSMC5	-0.046	0.511	0.081	0.525	-0.076	0.4	Nucleus	transcription regulator
PSMC6	proteasome 26S subunit, ATPase 6	PSMC6	PSMC6	PSMC6	-0.188	0.0938	0.104	0.185	0.167	0.308	Nucleus	peptidase
PSMD1	proteasome 26S subunit, non-ATPase 1	PSMD1	PSMD1	PSMD1	-0.029	0.863	-0.023	0.895	-0.101	0.411	Cytoplasm	other		bortezomib,bortezomib/cladribine/rituximab,bortezomib/dexamethasone,bortezomib/dexamethasone/doxorubicin,bortezomib/dexamethasone/lenalidomide,bortezomib/dexamethasone/pomalidomide,bortezomib/dexamethasone/rituximab,bortezomib/dexamethasone/thalidomide,bortezomib/doxorubicin,bortezomib/fulvestrant,bortezomib/lenalidomide,bortezomib/paclitaxel,bortezomib/prednisone,bortezomib/rituximab,bortezomib/…
PSMD2	proteasome 26S subunit, non-ATPase 2	PSMD2	PSMD2	PSMD2	0.077	0.541	0.254	0.145	-0.047	0.613	Cytoplasm	other		bortezomib,bortezomib/cladribine/rituximab,bortezomib/dexamethasone,bortezomib/dexamethasone/doxorubicin,bortezomib/dexamethasone/lenalidomide,bortezomib/dexamethasone/pomalidomide,bortezomib/dexamethasone/rituximab,bortezomib/dexamethasone/thalidomide,bortezomib/doxorubicin,bortezomib/fulvestrant,bortezomib/lenalidomide,bortezomib/paclitaxel,bortezomib/prednisone,bortezomib/rituximab,bortezomib/…
PSMD3	proteasome 26S subunit, non-ATPase 3	PSMD3	PSMD3	PSMD3	0.071	0.114	0.165	0.328	-0.011	0.929	Cytoplasm	other
PSMD5	proteasome 26S subunit, non-ATPase 5	PSMD5	PSMD5	PSMD5	0.108	0.21	0.169	0.292	0.148	0.191	Cytoplasm	other
PSMD6	proteasome 26S subunit, non-ATPase 6	PSMD6	PSMD6	PSMD6	-0.043	0.755	0.078	0.776	-0.107	0.556	Cytoplasm	enzyme
PSMD8	proteasome 26S subunit, non-ATPase 8	PSMD8	PSMD8	PSMD8	-0.028	0.679	0.078	0.741	0.036	0.84	Cytoplasm	other
PSMD10	proteasome 26S subunit, non-ATPase 10	PSMD10	PSMD10	PSMD10	-0.15	0.385	0.547	0.46	0.224	0.634	Cytoplasm	transcription regulator
PSMD11	proteasome 26S subunit, non-ATPase 11	PSMD11	PSMD11	PSMD11	0.006	0.878	0.003	0.981	0.033	0.795	Cytoplasm	other
PSMD12	proteasome 26S subunit, non-ATPase 12	PSMD12	PSMD12	PSMD12	-0.139	0.668	-0.341	0.303	-0.157	0.676	Cytoplasm	other
PSMD13	proteasome 26S subunit, non-ATPase 13	PSMD13	PSMD13	PSMD13	0.072	0.497	-0.034	0.817	0.045	0.584	Cytoplasm	peptidase
PSME1	proteasome activator subunit 1	PSME1	PSME1	PSME1	-0.092	0.506	-0.134	0.544	-0.144	0.592	Cytoplasm	other
PSME2	proteasome activator subunit 2	PSME2	PSME2	PSME2	-0.087	0.556	0.024	0.906	-0.266	0.385	Cytoplasm	peptidase
PSME3	proteasome activator subunit 3	PSME3	PSME3	PSME3	-0.006	0.975	-0.09	0.787	-0.214	0.373	Cytoplasm	peptidase
PSPC1	paraspeckle component 1	PSPC1	PSPC1	PSPC1	0.051	0.367	0.042	0.781	-0.003	0.982	Nucleus	transcription regulator
PTBP1	polypyrimidine tract binding protein 1	PTBP1	PTBP1	PTBP1	-0.091	0.187	-0.259	0.349	-0.188	0.399	Nucleus	enzyme	unspecified application
PTGES3	prostaglandin E synthase 3	PTGES3	PTGES3	PTGES3	0.06	0.674	-0.046	0.77	0.072	0.344	Cytoplasm	enzyme
PTGES	prostaglandin E synthase	PTGES	PTGES	PTGES	0.095	0.171	0.648	0.217	0.273	0.00362	Cytoplasm	enzyme	prognosis
PTGFRN	prostaglandin F2 receptor inhibitor	PTGFRN	PTGFRN	PTGFRN	0.096	0.568	0.174	0.34	0.262	0.332	Plasma Membrane	other
PTGR1	prostaglandin reductase 1	PTGR1	PTGR1	PTGR1	-0.091	0.673	-0.084	0.71	-0.057	0.748	Cytoplasm	enzyme
PTGS2	prostaglandin-endoperoxide synthase 2	PTGS2	PTGS2	PTGS2	-0.046	0.943	0.463	0.313	0.347	0.518	Cytoplasm	enzyme	diagnosis,disease progression,efficacy,prognosis,unspecified application	acetaminophen,acetaminophen/aspirin/caffeine,acetaminophen/aspirin/codeine,acetaminophen/butalbital,acetaminophen/butalbital/caffeine,acetaminophen/butalbital/caffeine/codeine,acetaminophen/caffeine/chlorpheniramine/hydrocodone/phenylephrine,acetaminophen/caffeine/dihydrocodeine,acetaminophen/cetirizine/prednisolone,acetaminophen/clemastine/pseudoephedrine,acetaminophen/codeine,acetaminophen/dexb…
PTK2	protein tyrosine kinase 2	PTK2	PTK2	PTK2	-0.171		0.357		-0.018		Cytoplasm	kinase	diagnosis,disease progression,efficacy,prognosis	BI 853520,conteltinib,lorlatinib,repotrectinib
PTK7	protein tyrosine kinase 7 (inactive)	PTK7	PTK7	PTK7	0.068	0.403	0.301	0.0308	0.194	0.0705	Plasma Membrane	kinase		cofetuzumab pelidotin
PTMA	prothymosin alpha	PTMA	PTMA	PTMA	0.055	0.463	0.151	0.0436	0.141	0.533	Nucleus	other
PTMS	parathymosin	PTMS	PTMS	PTMS	-0.073	0.128	0.137	0.374	0.092	0.68	Nucleus	other
PTPA	protein phosphatase 2 phosphatase activator	PPP2R4	PPP2R4	PPP2R4	0.023		0.251		0.191		Cytoplasm	phosphatase
PTPN23	protein tyrosine phosphatase non-receptor type 23	PTPN23	PTPN23	PTPN23	0.545		0.392		-0.405		Cytoplasm	phosphatase
PTPRC	protein tyrosine phosphatase receptor type C	PTPRC	PTPRC	PTPRC	-0.161	0.819	0.288	0.55	-0.324	0.305	Plasma Membrane	phosphatase	diagnosis,efficacy,unspecified application	111 In-BC8,90Y anti-CD45 MoAb BC8,anti-CD45 BC8 antibody-streptavidin conjugate,At 211 MAb BC8-B10,iodine I 131 apamistamab,Y 90 AHN-12
PUF60	poly(U) binding splicing factor 60	PUF60	PUF60	PUF60	-0.051	0.679	0.155	0.269	0.043	0.734	Nucleus	other
PURA	purine rich element binding protein A	PURA	PURA	PURA	0.073	0.347	0.002	0.991	-0.144	0.361	Nucleus	transcription regulator
PURB	purine rich element binding protein B	PURB	PURB	PURB	0.22	0.377	1.788	0.359	0.492	0.654	Nucleus	transcription regulator
PYCARD	PYD and CARD domain containing	PYCARD	PYCARD	PYCARD	-0.217	0.42	-0.166	0.575	-0.411	0.356	Cytoplasm	transcription regulator	diagnosis
PYGB	glycogen phosphorylase B	PYGB	PYGB	PYGB	-0.005	0.932	0.075	0.535	0.088	0.267	Cytoplasm	enzyme
PYGL	glycogen phosphorylase L	PYGL	PYGL	PYGL	-0.146	0.387	0.095	0.757	0.15	0.383	Cytoplasm	enzyme
PYGM	glycogen phosphorylase, muscle associated	PYGM	PYGM	PYGM	0.104		0.255		-0.296		Cytoplasm	enzyme
QARS1	glutaminyl-tRNA synthetase 1	QARS	QARS	QARS	-0.017	0.914	-0.21	0.493	-0.078	0.674	Cytoplasm	enzyme
QDPR	quinoid dihydropteridine reductase	QDPR	QDPR	QDPR	-0.015	0.883	0.006	0.982	0.031	0.777	Cytoplasm	enzyme
QPRT	quinolinate phosphoribosyltransferase	QPRT	QPRT	QPRT	0.018	0.916	-0.007	0.968	-0.093	0.617	Cytoplasm	enzyme		atorvastatin/niacin,lovastatin/niacin,nicotinic acid,nicotinic acid/pioglitazone
QSOX1	quiescin sulfhydryl oxidase 1	QSOX1	QSOX1	QSOX1	0.125	0.612	0.146	0.58	-0.224	0.553	Cytoplasm	enzyme
RAB10	RAB10, member RAS oncogene family	RAB10	RAB10	RAB10	1.026	0.272	0.934	0.147	0.373	0.062	Cytoplasm	enzyme
RAB13	RAB13, member RAS oncogene family	RAB13	RAB13	RAB13	-0.545	0.511	-0.28	0.603	0.116	0.85	Plasma Membrane	enzyme
RAB14	RAB14, member RAS oncogene family	RAB14	RAB14	RAB14	-0.068	0.448	0.184	0.198	-0.103	0.53	Cytoplasm	enzyme
RAB18	RAB18, member RAS oncogene family	RAB18	RAB18	RAB18	-0.132	0.336	-0.077	0.831	-0.193	0.171	Cytoplasm	enzyme
RAB21	RAB21, member RAS oncogene family	RAB21	RAB21	RAB21	0.504	0.338	0.407	0.312	-0.101	0.306	Cytoplasm	enzyme
RAB23	RAB23, member RAS oncogene family	RAB23	RAB23	RAB23	-0.014	0.945	0.122	0.644	0.303	0.22	Cytoplasm	enzyme
RAB31	RAB31, member RAS oncogene family	RAB31	RAB31	RAB31	-0.181	0.798	0.58	0.471	0.143	0.591	Cytoplasm	enzyme
RAB34	RAB34, member RAS oncogene family	RAB34	RAB34	RAB34	0.288	0.0847	0.56	0.0463	0.129	0.681	Cytoplasm	enzyme
RAB35	RAB35, member RAS oncogene family	RAB35	RAB35	RAB35	0.042	0.804	0.516	0.0218	0.095	0.658	Cytoplasm	enzyme
RAB11B	RAB11B, member RAS oncogene family	RAB11B	RAB11B	RAB11B	-0.134	0.482	0.025	0.903	-0.115	0.242	Cytoplasm	enzyme
RAB1A	RAB1A, member RAS oncogene family	RAB1A	RAB1A	RAB1A	-0.271	0.0938	-0.185	0.451	-0.18	0.119	Cytoplasm	enzyme
RAB1B	RAB1B, member RAS oncogene family	RAB1B	RAB1B	RAB1B	-0.075	0.608	-0.344	0.354	-0.177	0.551	Cytoplasm	other
RAB2A	RAB2A, member RAS oncogene family	RAB2A	RAB2A	RAB2A	-0.059	0.676	0.138	0.431	0.029	0.793	Cytoplasm	enzyme
RAB3D	RAB3D, member RAS oncogene family	RAB3D	RAB3D	RAB3D	-0.305	0.062	-0.344	0.208	-0.636	0.104	Cytoplasm	enzyme
RAB5A	RAB5A, member RAS oncogene family	RAB5A	RAB5A	RAB5A	0.033						Cytoplasm	enzyme
RAB5B	RAB5B, member RAS oncogene family	RAB5B	RAB5B	RAB5B	-0.097	0.6	0.43	0.136	-0.065	0.384	Cytoplasm	enzyme
RAB5C	RAB5C, member RAS oncogene family	RAB5C	RAB5C	RAB5C	-0.408	0.343	0.239	0.579	-0.007	0.965	Cytoplasm	enzyme
RAB6A	RAB6A, member RAS oncogene family	RAB6A	RAB6A	RAB6A	-0.171	0.283	0.108	0.452	-0.075	0.23	Cytoplasm	enzyme
RAB7A	RAB7A, member RAS oncogene family	RAB7A	RAB7A	RAB7A	-0.193	0.17	-0.06	0.755	-0.031	0.504	Cytoplasm	enzyme
RAB8B	RAB8B, member RAS oncogene family	RAB8B	RAB8B	RAB8B	-0.124	0.295	-0.227	0.213	-0.05	0.686	Cytoplasm	enzyme
RABGAP1	RAB GTPase activating protein 1	RABGAP1	RABGAP1	RABGAP1	0.2	0.33	0.621	0.0762	0.505	0.251	Cytoplasm	other
RAC1	Rac family small GTPase 1	RAC1	RAC1	RAC1	-0.243	0.236	0.105	0.789	-0.155	0.372	Plasma Membrane	enzyme
RACK1	receptor for activated C kinase 1	GNB2L1	GNB2L1	GNB2L1	-0.085	0.34	-0.109	0.409	-0.109	0.587	Cytoplasm	enzyme
RAD21	RAD21 cohesin complex component	RAD21	RAD21	RAD21	-0.011	0.917	0.126	0.163	0.185	0.408	Nucleus	transcription regulator
RAD50	RAD50 double strand break repair protein	RAD50	RAD50	RAD50	0.123	0.0596	0.246	0.227	-0.03	0.79	Nucleus	enzyme
RAD23A	RAD23 homolog A, nucleotide excision repair protein	RAD23A	RAD23A	RAD23A	0.011	0.95	0.109	0.779	-0.064	0.691	Nucleus	other
RAD23B	RAD23 homolog B, nucleotide excision repair protein	RAD23B	RAD23B	RAD23B	-0.054	0.494	-0.116	0.389	-0.11	0.291	Nucleus	other
RAI14	retinoic acid induced 14	RAI14	RAI14	RAI14	-0.003	0.983	0.124	0.286	-0.097	0.0503	Nucleus	transcription regulator
RALA	RAS like proto-oncogene A	RALA	RALA	RALA	-0.272	0.723	-0.443	0.562	-0.113	0.647	Cytoplasm	enzyme
RALB	RAS like proto-oncogene B	RALB	RALB	RALB	-1.301		-0.542		-0.374		Cytoplasm	enzyme
RALY	RALY heterogeneous nuclear ribonucleoprotein	RALY	RALY	RALY	-0.043	0.448	-0.184	0.371	-0.101	0.38	Nucleus	transcription regulator
RAN	RAN, member RAS oncogene family	RAN	RAN	RAN	-0.044	0.235	-0.072	0.338	-0.03	0.665	Nucleus	enzyme
RANBP1	RAN binding protein 1	RANBP1	RANBP1	RANBP1	-0.071	0.309	0.116	0.545	-0.17	0.498	Nucleus	other	unspecified application
RANBP2	RAN binding protein 2	RANBP2	RANBP2	RANBP2	-0.073	0.64	0.222	0.133	-0.045	0.581	Nucleus	enzyme
RANBP3	RAN binding protein 3	RANBP3	RANBP3	RANBP3	0.11	0.68	0.8	0.0885	0.05	0.842	Nucleus	other
RANGAP1	Ran GTPase activating protein 1	RANGAP1	RANGAP1	RANGAP1	-0.014	0.936	0.046	0.698	-0.094	0.134	Nucleus	other
RAP1A	RAP1A, member of RAS oncogene family	RAP1A	RAP1A	RAP1A	-0.231	0.456	0.324	0.344	-0.075	0.593	Cytoplasm	enzyme
RAP1B	RAP1B, member of RAS oncogene family	RAP1B	RAP1B	RAP1B	-0.094	0.68	0.32	0.277	0.265	0.0334	Cytoplasm	enzyme	unspecified application
RAP2B	RAP2B, member of RAS oncogene family	RAP2B	RAP2B	RAP2B	0.067	0.476	0.176	0.131	0.15	0.176	Plasma Membrane	enzyme
RARRES2	retinoic acid receptor responder 2	RARRES2	RARRES2	RARRES2	0.356	0.0575	0.747	0.178	0.468	0.0653	Plasma Membrane	transmembrane receptor
RARS1	arginyl-tRNA synthetase 1	RARS	RARS	RARS	0.017	0.842	0.182	0.331	0.067	0.472	Cytoplasm	enzyme
RAVER1	ribonucleoprotein, PTB binding 1	RAVER1	RAVER1	RAVER1	-0.041	0.736	0.192	0.0296	0.097	0.051	Nucleus	other
RBBP4	RB binding protein 4, chromatin remodeling factor	RBBP4	RBBP4	RBBP4	-0.008	0.888	0.033	0.777	0.036	0.779	Nucleus	enzyme
RBBP7	RB binding protein 7, chromatin remodeling factor	RBBP7	RBBP7	RBBP7	0.037	0.656	0.056	0.499	0.132	0.548	Nucleus	transcription regulator
RBM4	RNA binding motif protein 4	RBM4	RBM4	RBM4	0.087	0.225	0.297	0.253	0.138	0.503	Nucleus	other
RBM17	RNA binding motif protein 17	RBM17	RBM17	RBM17	-0.183	0.00483	0.145	0.17	-0.05	0.598	Nucleus	other
RBM25	RNA binding motif protein 25	RBM25	RBM25	RBM25	0.065	0.346	-0.18	0.711	-0.159	0.688	Nucleus	other
RBM39	RNA binding motif protein 39	RBM39	RBM39	RBM39	-0.127	0.206	-0.132	0.457	-0.041	0.786	Nucleus	transcription regulator
RBM12B	RNA binding motif protein 12B	RBM12B	RBM12B	RBM12B	0.191	0.293	1.414	0.17	0.659	0.443	Other	other	unspecified application
RBM8A	RNA binding motif protein 8A	RBM8A	RBM8A	RBM8A	0.064	0.542	0.264	0.316	0.026	0.918	Nucleus	other
RBMX	RNA binding motif protein X-linked	RBMX	RBMX	RBMX	-0.102	0.336	0.111	0.419	0.075	0.542	Nucleus	other
RBP1	retinol binding protein 1	RBP1	RBP1	RBP1	-0.375	0.335	0.098	0.827	-0.203	0.611	Extracellular Space	transporter	diagnosis
RBP4	retinol binding protein 4	RBP4	RBP4	RBP4	-0.153	0.441	0.004	0.994	-0.207	0.442	Extracellular Space	other	unspecified application
RBSN	rabenosyn, RAB effector	ZFYVE20	ZFYVE20	ZFYVE20	0.115	0.485	0.091	0.652	0.12	0.2	Cytoplasm	other
RCC1	regulator of chromosome condensation 1	RCC1	RCC1	RCC1	0.294	0.0797	0.29	0.454	-0.013	0.963	Cytoplasm	other	unspecified application
RCC2	regulator of chromosome condensation 2	RCC2	RCC2	RCC2	0.432	0.432	0.319	0.358	0.103	0.201	Nucleus	other
RCN1	reticulocalbin 1	RCN1	RCN1	RCN1	-0.044	0.618	-0.16	0.236	-0.066	0.548	Cytoplasm	other
RCN3	reticulocalbin 3	RCN3	RCN3	RCN3	0.14	0.445	0.066	0.706	0.196	0.192	Cytoplasm	other
RDX	radixin	RDX	RDX	RDX	-0.019	0.856	-0.042	0.795	-0.108	0.578	Cytoplasm	other	unspecified application
RECQL	RecQ like helicase	RECQL	RECQL	RECQL	0.042	0.859	0.188	0.355	0.129	0.64	Nucleus	enzyme
REEP5	receptor accessory protein 5	REEP5	REEP5	REEP5	-0.189	0.51	0.053	0.873	0.111	0.676	Extracellular Space	transporter
RELA	RELA proto-oncogene, NF-kB subunit	RELA	RELA	RELA	-0.146	0.536	-0.193	0.459	-0.219	0.736	Nucleus	transcription regulator	diagnosis,efficacy	NF-kappaB decoy
REXO2	RNA exonuclease 2	REXO2	REXO2	REXO2	-0.069	0.796	-0.138	0.712	-0.092	0.773	Cytoplasm	enzyme	unspecified application
RHOA	ras homolog family member A	RHOA	RHOA	RHOA	-0.114	0.654	0.047	0.886	0.087	0.545	Cytoplasm	enzyme
RHOC	ras homolog family member C	RHOC	RHOC	RHOC	0.118	0.764	-0.447	0.362	-0.004	0.988	Plasma Membrane	enzyme	diagnosis,prognosis
RIC8A	RIC8 guanine nucleotide exchange factor A	RIC8A	RIC8A	RIC8A	-0.031	0.84	0.047	0.896	-0.051	0.859	Cytoplasm	other
RMDN1	regulator of microtubule dynamics 1	RMDN1	RMDN1	RMDN1	-0.026	0.945	0.151	0.57	0.333	0.423	Cytoplasm	other
RNH1	ribonuclease/angiogenin inhibitor 1	RNH1	RNH1	RNH1	0.122	0.385	0.109	0.27	0.074	0.256	Cytoplasm	other
RNPEP	arginyl aminopeptidase	RNPEP	RNPEP	RNPEP	-0.088	0.153	0.089	0.205	0.015	0.643	Cytoplasm	peptidase
RO60	Ro60, Y RNA binding protein	TROVE2	TROVE2	TROVE2	-0.078	0.129	0.018	0.65	0.034	0.818	Nucleus	other
ROCK2	Rho associated coiled-coil containing protein kinase 2	ROCK2	ROCK2	ROCK2	-0.068	0.575	0.093	0.441	-0.028	0.855	Cytoplasm	kinase		KD025
RPA1	replication protein A1	RPA1	RPA1	RPA1	-0.016	0.934	0.06	0.404	0.11	0.556	Nucleus	other
RPL3	ribosomal protein L3	RPL3	RPL3	RPL3	0.083	0.689	0.113	0.658	-0.015	0.922	Nucleus	other		cytarabine/daunorubicin/omacetaxine mepesuccinate,cytarabine/doxorubicin/filgrastim/omacetaxine mepesuccinate,omacetaxine mepesuccinate
RPL4	ribosomal protein L4	RPL4	RPL4	RPL4	-0.032	0.886	0.128	0.705	0	0.999	Cytoplasm	enzyme
RPL5	ribosomal protein L5	RPL5	RPL5	RPL5	0.038	0.729	0.073	0.756	-0.083	0.71	Cytoplasm	other
RPL6	ribosomal protein L6	RPL6	RPL6	RPL6	0.12	0.625	0.381	0.372	0.186	0.366	Nucleus	other	unspecified application
RPL7	ribosomal protein L7	RPL7	RPL7	RPL7	0.069	0.631	0.261	0.524	0.138	0.526	Nucleus	transcription regulator
RPL8	ribosomal protein L8	RPL8	RPL8	RPL8	-0.082	0.687	0.341	0.279	0.159	0.221	Cytoplasm	other
RPL9	ribosomal protein L9	RPL9	RPL9	RPL9	0.032	0.793	0.258	0.119	0.028	0.88	Nucleus	other	diagnosis
RPL10	ribosomal protein L10	RPL10	RPL10	RPL10	0.234	0.263	0.176	0.333	0.083	0.606	Cytoplasm	translation regulator
RPL11	ribosomal protein L11	RPL11	RPL11	RPL11	-0.06	0.537	-0.055	0.793	0.061	0.796	Cytoplasm	other
RPL12	ribosomal protein L12	RPL12	RPL12	RPL12	-0.168	0.14	-0.126	0.277	-0.165	0.274	Nucleus	other
RPL13	ribosomal protein L13	RPL13	RPL13	RPL13	0.144	0.518	0.335	0.246	0.194	0.196	Nucleus	other
RPL14	ribosomal protein L14	RPL14	RPL14	RPL14	0.16	0.357	0.121	0.61	0.081	0.657	Cytoplasm	other
RPL15	ribosomal protein L15	RPL15	RPL15	RPL15	-0.14	0.235	0.118	0.589	-0.05	0.693	Cytoplasm	other
RPL17	ribosomal protein L17	RPL17	RPL17	RPL17	0.003	0.981	-0.019	0.949	-0.042	0.799	Cytoplasm	other
RPL18	ribosomal protein L18	RPL18	RPL18	RPL18	-0.034	0.863	-0.08	0.82	-0.148	0.4	Cytoplasm	other
RPL19	ribosomal protein L19	RPL19	RPL19	RPL19	-0.015	0.945	0.048	0.839	-0.09	0.556	Cytoplasm	other
RPL21	ribosomal protein L21	RPL21	RPL21	RPL21	0.247	0.356	0.471	0.107	0.286	0.132	Cytoplasm	other
RPL22	ribosomal protein L22	RPL22	RPL22	RPL22	-0.062	0.518	0.053	0.709	0.143	0.284	Cytoplasm	translation regulator
RPL23	ribosomal protein L23	RPL23	RPL23	RPL23	0.04	0.684	0.209	0.353	0.172	0.0837	Cytoplasm	other
RPL24	ribosomal protein L24	RPL24	RPL24	RPL24	0.121	0.344	0.256	0.223	0.289	0.0125	Cytoplasm	other
RPL26	ribosomal protein L26	RPL26	RPL26	RPL26	0.029	0.931	-0.121	0.851	-0.159	0.512	Cytoplasm	other
RPL27	ribosomal protein L27	RPL27	RPL27	RPL27	-0.005	0.969	0.058	0.877	0.079	0.612	Cytoplasm	other
RPL28	ribosomal protein L28	RPL28	RPL28	RPL28	0.177	0.569	0.364	0.00401	-0.116	0.762	Cytoplasm	other
RPL30	ribosomal protein L30	RPL30	RPL30	RPL30	0.034	0.755	0.018	0.871	0.073	0.587	Cytoplasm	other
RPL31	ribosomal protein L31	RPL31	RPL31	RPL31	0.103	0.451	0.068	0.763	-0.067	0.774	Cytoplasm	other
RPL32	ribosomal protein L32	RPL32	RPL32	RPL32	0.255	0.28	0.081	0.765	0.173	0.526	Cytoplasm	other
RPL34	ribosomal protein L34	RPL34	RPL34	RPL34	0.045	0.817	0.263	0.374	-0.073	0.794	Cytoplasm	other
RPL35	ribosomal protein L35	RPL35	RPL35	RPL35	0.031	0.815	0.091	0.741	0.179	0.31	Cytoplasm	other
RPL36	ribosomal protein L36	RPL36	RPL36	RPL36	0.093	0.682	0.18	0.559	0.213	0.19	Cytoplasm	other
RPL38	ribosomal protein L38	RPL38	RPL38	RPL38	-0.094	0.535	0.215	0.165	0.121	0.465	Cytoplasm	other
RPL10A	ribosomal protein L10a	RPL10A	RPL10A	RPL10A	-0.162	0.36	0.063	0.785	0.057	0.664	Nucleus	other
RPL13A	ribosomal protein L13a	RPL13A	RPL13A	RPL13A	-0.103	0.567	0.074	0.818	-0.058	0.745	Cytoplasm	other
RPL18A	ribosomal protein L18a	RPL18A	RPL18A	RPL18A	-0.18	0.271	-0.041	0.838	-0.199	0.303	Cytoplasm	other
RPL23A	ribosomal protein L23a	RPL23A	RPL23A	RPL23A	-0.04	0.747	-0.06	0.845	0.082	0.701	Cytoplasm	other
RPL26L1	ribosomal protein L26 like 1	RPL26L1	RPL26L1	RPL26L1	-0.11	0.608	-0.099	0.807	0.019	0.861	Cytoplasm	other
RPL27A	ribosomal protein L27a	RPL27A	RPL27A	RPL27A	-0.02	0.858	-0.132	0.724	-0.087	0.766	Cytoplasm	other
RPL35A	ribosomal protein L35a	RPL35A	RPL35A	RPL35A	-0.019	0.852	0.168	0.334	0.247	0.0352	Cytoplasm	other
RPL7A	ribosomal protein L7a	RPL7A	RPL7A	RPL7A	-0.142	0.263	0.006	0.981	-0.05	0.69	Cytoplasm	other
RPLP0	ribosomal protein lateral stalk subunit P0	RPLP0	RPLP0	RPLP0	-0.229	0.00697	-0.158	0.149	-0.124	0.353	Cytoplasm	other
RPLP1	ribosomal protein lateral stalk subunit P1	RPLP1	RPLP1	RPLP1	0.269	0.0993	-0.213	0.45	0.194	0.424	Cytoplasm	other
RPLP2	ribosomal protein lateral stalk subunit P2	RPLP2	RPLP2	RPLP2	-0.087	0.391	-0.312	0.306	-0.285	0.37	Cytoplasm	other
RPN1	ribophorin I	RPN1	RPN1	RPN1	-0.176	0.446	0.028	0.928	-0.081	0.569	Cytoplasm	enzyme
RPN2	ribophorin II	RPN2	RPN2	RPN2	-0.283	0.316	0.014	0.966	-0.142	0.562	Cytoplasm	enzyme
RPRD2	regulation of nuclear pre-mRNA domain containing 2	RPRD2	RPRD2	RPRD2	-0.268	0.284	-0.317	0.512	-0.671	0.0852	Nucleus	other
RPRD1A	regulation of nuclear pre-mRNA domain containing 1A	RPRD1A	RPRD1A	RPRD1A	0.18		0.972		1.071		Extracellular Space	other
RPRD1B	regulation of nuclear pre-mRNA domain containing 1B	RPRD1B	RPRD1B	RPRD1B	-0.081	0.473	-0.035	0.79	0.012	0.928	Nucleus	other
RPS2	ribosomal protein S2	RPS2	RPS2	RPS2	-0.113	0.242	0.043	0.807	0.011	0.916	Cytoplasm	other
RPS3	ribosomal protein S3	RPS3	RPS3	RPS3	-0.044	0.642	-0.022	0.868	0.034	0.833	Cytoplasm	enzyme	unspecified application
RPS5	ribosomal protein S5	RPS5	RPS5	RPS5	0.21	0.165	0.24	0.363	0.124	0.519	Cytoplasm	other
RPS6	ribosomal protein S6	RPS6	RPS6	RPS6	0.102	0.528	0.147	0.563	0.108	0.596	Cytoplasm	other	efficacy,response to therapy
RPS7	ribosomal protein S7	RPS7	RPS7	RPS7	-0.006	0.948	0.122	0.503	0.095	0.442	Cytoplasm	other
RPS8	ribosomal protein S8	RPS8	RPS8	RPS8	0.008	0.968	0.073	0.821	-0.04	0.875	Cytoplasm	other
RPS9	ribosomal protein S9	RPS9	RPS9	RPS9	0.157	0.159	0.426	0.32	-0.006	0.985	Cytoplasm	translation regulator
RPS10	ribosomal protein S10	RPS10	RPS10	RPS10	-0.043	0.802	-0.434	0.188	-0.167	0.698	Cytoplasm	other
RPS11	ribosomal protein S11	RPS11	RPS11	RPS11	0.151	0.2	0.118	0.593	0.054	0.61	Cytoplasm	other
RPS12	ribosomal protein S12	RPS12	RPS12	RPS12	-0.036	0.511	-0.191	0.321	-0.143	0.406	Cytoplasm	other		neomycin
RPS13	ribosomal protein S13	RPS13	RPS13	RPS13	-0.15	0.196	0.309	0.238	0.234	0.0252	Cytoplasm	other
RPS14	ribosomal protein S14	RPS14	RPS14	RPS14	-0.028	0.737	0.028	0.74	0.111	0.00291	Cytoplasm	translation regulator
RPS15	ribosomal protein S15	RPS15	RPS15	RPS15	-0.14	0.843	0.517	0.0382	0.542	0.199	Cytoplasm	other
RPS16	ribosomal protein S16	RPS16	RPS16	RPS16	0.089	0.66	0.113	0.636	0.167	0.194	Cytoplasm	other
RPS17	ribosomal protein S17	RPS17L	RPS17L	RPS17L	0.095	0.416	-0.105	0.63	-0.064	0.498	Cytoplasm	other
RPS18	ribosomal protein S18	RPS18	RPS18	RPS18	0.105	0.447	0.203	0.349	0.273	0.0945	Cytoplasm	other
RPS19	ribosomal protein S19	RPS19	RPS19	RPS19	-0.052	0.654	-0.037	0.698	-0.034	0.703	Cytoplasm	other
RPS20	ribosomal protein S20	RPS20	RPS20	RPS20	0.036	0.773	0.108	0.514	0.044	0.627	Cytoplasm	other
RPS21	ribosomal protein S21	RPS21	RPS21	RPS21	0.012	0.923	-0.105	0.571	-0.136	0.349	Cytoplasm	other
RPS23	ribosomal protein S23	RPS23	RPS23	RPS23	0.108	0.393	0.462	0.0716	0.195	0.124	Cytoplasm	translation regulator
RPS24	ribosomal protein S24	RPS24	RPS24	RPS24	-0.021	0.898	0.02	0.947	0.043	0.827	Cytoplasm	other	unspecified application
RPS25	ribosomal protein S25	RPS25	RPS25	RPS25	0.064	0.723	0.129	0.586	0.175	0.106	Cytoplasm	other
RPS26	ribosomal protein S26	RPS26	RPS26	RPS26	0.039	0.601	-0.11	0.756	-0.054	0.838	Cytoplasm	other
RPS27	ribosomal protein S27	RPS27	RPS27	RPS27	0.419	0.328	0.093	0.774	-0.04	0.811	Cytoplasm	other		empesertib
RPS28	ribosomal protein S28	RPS28	RPS28	RPS28	-0.148	0.0419	-0.237	0.184	0.039	0.462	Cytoplasm	other
RPS15A	ribosomal protein S15a	RPS15A	RPS15A	RPS15A	-0.157	0.369	-0.067	0.718	-0.058	0.744	Cytoplasm	other
RPS27A	ribosomal protein S27a	RPS27A	RPS27A	RPS27A	-0.122	0.36	0.22	0.23	0.5	0.192	Cytoplasm	other
RPS3A	ribosomal protein S3A	RPS3A	RPS3A	RPS3A	0.008	0.908	0.115	0.373	0.094	0.165	Nucleus	other
RPS4X	ribosomal protein S4 X-linked	RPS4X	RPS4X	RPS4X	-0.05	0.523	-0.087	0.653	0.004	0.98	Cytoplasm	other	diagnosis
RPSA	ribosomal protein SA	RPSA	RPSA	RPSA	0.071	0.34	0.063	0.135	-0.053	0.61	Cytoplasm	translation regulator
RRAGC	Ras related GTP binding C	RRAGC	RRAGC	RRAGC	0.095	0.774	0.226	0.449	-0.099	0.422	Cytoplasm	enzyme
RRAS	RAS related	RRAS	RRAS	RRAS	-0.237	0.322	0.153	0.458	0.085	0.555	Cytoplasm	enzyme
RRBP1	ribosome binding protein 1	RRBP1	RRBP1	RRBP1	-0.052	0.717	0.058	0.645	-0.036	0.859	Cytoplasm	other
RSU1	Ras suppressor protein 1	RSU1	RSU1	RSU1	-0.021	0.886	0.069	0.698	0.118	0.601	Cytoplasm	other
RTCB	RNA 2',3'-cyclic phosphate and 5'-OH ligase	C22orf28	C22orf28	C22orf28	-0.008	0.913	0.106	0.426	0.119	0.149	Cytoplasm	enzyme
RTN4	reticulon 4	RTN4	RTN4	RTN4	-0.145	0.461	0.409	0.157	0.171	0.171	Cytoplasm	other	diagnosis
RTRAF	RNA transcription, translation and transport factor	C14orf166	C14orf166	C14orf166	-0.024	0.882	-0.088	0.54	-0.179	0.457	Nucleus	other
RUFY1	RUN and FYVE domain containing 1	RUFY1	RUFY1	RUFY1	0.173	0.0656	0.229	0.143	0.22	0.351	Cytoplasm	other
RUSF1	RUS family member 1	C16orf58	C16orf58	C16orf58	0.15		0.198		0.677		Other	other
RUVBL1	RuvB like AAA ATPase 1	RUVBL1	RUVBL1	RUVBL1	-0.088	0.321	-0.082	0.71	-0.023	0.877	Nucleus	transcription regulator
RUVBL2	RuvB like AAA ATPase 2	RUVBL2	RUVBL2	RUVBL2	-0.117	0.295	0.056	0.697	-0.083	0.537	Nucleus	transcription regulator
S100A2	S100 calcium binding protein A2	S100A2	S100A2	S100A2	-0.572	0.557	-0.605	0.369	-0.331	0.76	Nucleus	other
S100A4	S100 calcium binding protein A4	S100A4	S100A4	S100A4	-0.08	0.535	-0.145	0.479	-0.177	0.571	Cytoplasm	other	disease progression
S100A7	S100 calcium binding protein A7	S100A7	S100A7	S100A7	-1.277	0.363	-0.923	0.398	-1.312	0.329	Cytoplasm	other	efficacy,unspecified application
S100A8	S100 calcium binding protein A8	S100A8	S100A8	S100A8	-0.946	0.337	-0.122	0.853	-0.964	0.246	Cytoplasm	other	diagnosis,efficacy,unspecified application
S100A9	S100 calcium binding protein A9	S100A9	S100A9	S100A9	-0.657	0.411	0.087	0.878	-0.554	0.443	Cytoplasm	other	diagnosis,unspecified application
S100A10	S100 calcium binding protein A10	S100A10	S100A10	S100A10	-0.051	0.821	-0.417	0.289	0.114	0.766	Cytoplasm	other
S100A11	S100 calcium binding protein A11	S100A11	S100A11	S100A11	0.044	0.878	-0.115	0.748	-0.129	0.74	Cytoplasm	other
S100A13	S100 calcium binding protein A13	S100A13	S100A13	S100A13	0.042	0.654	-0.023	0.875	-0.07	0.631	Cytoplasm	other
S100A14	S100 calcium binding protein A14	S100A14	S100A14	S100A14	-0.167	0.845	-0.276	0.68	-0.324	0.751	Cytoplasm	other
S100A16	S100 calcium binding protein A16	S100A16	S100A16	S100A16	0.01	0.98	-0.176	0.635	-0.227	0.666	Nucleus	other
S100P	S100 calcium binding protein P	S100P	S100P	S100P	-1.188	0.147	-0.541	0.759	-0.428	0.581	Cytoplasm	other	diagnosis,unspecified application
SACM1L	SAC1 like phosphatidylinositide phosphatase	SACM1L	SACM1L	SACM1L	-0.382	0.717	0.188	0.883	-0.14	0.657	Cytoplasm	phosphatase
SAE1	SUMO1 activating enzyme subunit 1	SAE1	SAE1	SAE1	-0.002	0.984	0.24	0.13	0.108	0.5	Cytoplasm	enzyme
SAFB	scaffold attachment factor B	SAFB	SAFB	SAFB	0.03	0.765	0.189	0.431	0.187	0.391	Nucleus	other
SAMHD1	SAM and HD domain containing deoxynucleoside triphosphate triphosphohydrolase 1	SAMHD1	SAMHD1	SAMHD1	-0.104	0.655	-0.025	0.732	0.023	0.94	Nucleus	enzyme
SAR1A	secretion associated Ras related GTPase 1A	SAR1A	SAR1A	SAR1A	-0.091	0.556	0.002	0.995	-0.036	0.893	Cytoplasm	enzyme
SARS1	seryl-tRNA synthetase 1	SARS	SARS	SARS	0.086	0.38	0.05	0.499	0.137	0.128	Cytoplasm	enzyme
SART3	spliceosome associated factor 3, U4/U6 recycling protein	SART3	SART3	SART3	0.152	0.276	0.13	0.521	0.05	0.886	Nucleus	other
SBDS	SBDS ribosome maturation factor	SBDS	SBDS	SBDS	-0.046	0.554	0.125	0.396	0.201	0.11	Nucleus	other
SBSN	suprabasin	SBSN	SBSN	SBSN	-0.048	0.906	0.295	0.0822	-0.7	0.162	Cytoplasm	other
SCARB2	scavenger receptor class B member 2	SCARB2	SCARB2	SCARB2	-0.321	0.404	0.028	0.931	-0.081	0.555	Plasma Membrane	transmembrane receptor	disease progression
SCEL	sciellin	SCEL	SCEL	SCEL	-0.441	0.741	0.076	0.852	-0.251	0.714	Cytoplasm	other
SCFD1	sec1 family domain containing 1	SCFD1	SCFD1	SCFD1	-0.051	0.753	-0.09	0.346	-0.077	0.734	Cytoplasm	transporter
SCP2	sterol carrier protein 2	SCP2	SCP2	SCP2	-0.083	0.399	-0.022	0.85	-0.009	0.96	Cytoplasm	transporter
SCRIB	scribble planar cell polarity protein	SCRIB	SCRIB	SCRIB	0.301	0.0239	0.322	0.0482	0.249	0.14	Cytoplasm	other
SCRN1	secernin 1	SCRN1	SCRN1	SCRN1	-0.095	0.194	0.102	0.282	-0.053	0.746	Cytoplasm	other
SCRN2	secernin 2	SCRN2	SCRN2	SCRN2	0.083	0.24	0.92	0.365	0.049	0.888	Extracellular Space	other
SDF4	stromal cell derived factor 4	SDF4	SDF4	SDF4	-0.204	0.733	-0.253	0.818	-0.129	0.872	Cytoplasm	other
SDHA	succinate dehydrogenase complex flavoprotein subunit A	SDHA	SDHA	SDHA	0.025	0.649	0.125	0.895	0.155	0.798	Cytoplasm	enzyme
SDHB	succinate dehydrogenase complex iron sulfur subunit B	SDHB	SDHB	SDHB	-0.181	0.15	-0.033	0.796	0.071	0.44	Cytoplasm	enzyme
SEC13	SEC13 homolog, nuclear pore and COPII coat complex component	SEC13	SEC13	SEC13	-0.018	0.846	-0.022	0.85	0.051	0.81	Cytoplasm	transporter
SEC11A	SEC11 homolog A, signal peptidase complex subunit	SEC11A	SEC11A	SEC11A	-0.381	0.297	0.246	0.507	-0.005	0.977	Cytoplasm	peptidase
SEC22B	SEC22 homolog B, vesicle trafficking protein (gene/pseudogene)	SEC22B	SEC22B	SEC22B	-0.073	0.644	0.336	0.0492	0.162	0.292	Cytoplasm	other
SEC23A	Sec23 homolog A, COPII coat complex component	SEC23A	SEC23A	SEC23A	0.139	0.498	0.175	0.385	0.039	0.654	Cytoplasm	transporter
SEC23B	SEC23 homolog B, COPII coat complex component	SEC23B	SEC23B	SEC23B	0.124	0.415	0.365	0.308	0.138	0.602	Extracellular Space	transporter
SEC24C	SEC24 homolog C, COPII coat complex component	SEC24C	SEC24C	SEC24C	-0.019	0.911	0.222	0.166	0.178	0.229	Cytoplasm	transporter
SEC24D	SEC24 homolog D, COPII coat complex component	SEC24D	SEC24D	SEC24D	0.016	0.928	0.042	0.785	-0.021	0.908	Cytoplasm	transporter
SEC31A	SEC31 homolog A, COPII coat complex component	SEC31A	SEC31A	SEC31A	0.023	0.876	0.003	0.977	-0.077	0.604	Cytoplasm	other
SEC61A1	SEC61 translocon subunit alpha 1	SEC61A1	SEC61A1	SEC61A1	-0.25	0.469	0.044	0.895	-0.148	0.575	Cytoplasm	transporter
SEH1L	SEH1 like nucleoporin	SEH1L	SEH1L	SEH1L	0.124	0.447	0.133	0.659	-0.105	0.592	Cytoplasm	transporter
SELENBP1	selenium binding protein 1	SELENBP1	SELENBP1	SELENBP1	-0.089	0.471	0.095	0.559	-0.001	0.994	Cytoplasm	other
SELENOM	selenoprotein M	SELM	SELM	SELM	0.137	0.232	0.284	0.261	0.359	0.185	Cytoplasm	other
SERBP1	SERPINE1 mRNA binding protein 1	SERBP1	SERBP1	SERBP1	0.089	0.652	0.161	0.0414	0.068	0.318	Cytoplasm	other
SERPINA1	serpin family A member 1	SERPINA1	SERPINA1	SERPINA1	-0.117	0.671	0.029	0.936	-0.166	0.541	Extracellular Space	other	diagnosis,unspecified application
SERPINA3	serpin family A member 3	SERPINA3	SERPINA3	SERPINA3	0.086	0.676	0.126	0.711	0.056	0.791	Extracellular Space	other	unspecified application
SERPINA4	serpin family A member 4	SERPINA4	SERPINA4	SERPINA4	0.098	0.681	0.134	0.184	-0.207	0.212	Extracellular Space	other
SERPINB1	serpin family B member 1	SERPINB1	SERPINB1	SERPINB1	-0.099	0.823	-0.07	0.816	-0.211	0.677	Cytoplasm	other
SERPINB2	serpin family B member 2	SERPINB2	SERPINB2	SERPINB2	-0.236	0.731	-0.709	0.155	-0.337	0.676	Extracellular Space	other
SERPINB3	serpin family B member 3	SERPINB3	SERPINB3	SERPINB3	0.332	0.674	0.148	0.778	0.876	0.303	Cytoplasm	other	diagnosis
SERPINB4	serpin family B member 4	SERPINB4	SERPINB4	SERPINB4	0.372	0.662	0.49	0.365	0.603	0.432	Cytoplasm	other	diagnosis
SERPINB5	serpin family B member 5	SERPINB5	SERPINB5	SERPINB5	-0.154	0.821	-0.049	0.852	-0.002	0.997	Extracellular Space	other	disease progression,efficacy
SERPINB6	serpin family B member 6	SERPINB6	SERPINB6	SERPINB6	-0.084	0.311	-0.158	0.296	-0.081	0.543	Cytoplasm	other
SERPINB8	serpin family B member 8	SERPINB8	SERPINB8	SERPINB8	0.013	0.957	-0.02	0.906	-0.373	0.268	Cytoplasm	other
SERPINB9	serpin family B member 9	SERPINB9	SERPINB9	SERPINB9	-0.467	0.018	-0.119	0.337	-0.131	0.599	Cytoplasm	other
SERPINB13	serpin family B member 13	SERPINB13	SERPINB13	SERPINB13	0.615	0.169	0.701	0.0197	0.762	0.168	Cytoplasm	other	unspecified application
SERPINC1	serpin family C member 1	SERPINC1	SERPINC1	SERPINC1	-0.104	0.64	-0.05	0.878	-0.125	0.494	Extracellular Space	enzyme	diagnosis,unspecified application	ardeparin,aspirin/enoxaparin,dalteparin,enoxaparin,enoxaparin/warfarin,fondaparinux,fondaparinux/warfarin,glucuronyl glucosamine glycan sulfate,heparin,low molecular weight heparin,nadroparin,semuloparin,SR-123781A
SERPIND1	serpin family D member 1	SERPIND1	SERPIND1	SERPIND1	0.105	0.144	0.118	0.451	-0.066	0.742	Extracellular Space	other	disease progression	ardeparin,glucuronyl glucosamine glycan sulfate
SERPINF1	serpin family F member 1	SERPINF1	SERPINF1	SERPINF1	0.055	0.7	-0.134	0.534	-0.175	0.294	Extracellular Space	other
SERPINF2	serpin family F member 2	SERPINF2	SERPINF2	SERPINF2	-0.113	0.601	0.156	0.65	-0.149	0.598	Extracellular Space	other
SERPING1	serpin family G member 1	SERPING1	SERPING1	SERPING1	-0.019	0.936	0.021	0.931	0.005	0.987	Extracellular Space	other
SERPINH1	serpin family H member 1	SERPINH1	SERPINH1	SERPINH1	0.052	0.724	-0.155	0.37	0.005	0.983	Extracellular Space	other
SET	SET nuclear proto-oncogene	SET	SET	SET	-0.129	0.206	-0.248	0.226	-0.149	0.35	Nucleus	phosphatase	prognosis
SF1	splicing factor 1	SF1	SF1	SF1	0.178	0.173	0.429	0.00942	0.24	0.408	Nucleus	transcription regulator
SF3A1	splicing factor 3a subunit 1	SF3A1	SF3A1	SF3A1	0.103	0.236	0.301	0.0755	0.039	0.553	Nucleus	other
SF3A3	splicing factor 3a subunit 3	SF3A3	SF3A3	SF3A3	0.044	0.683	0.141	0.102	-0.287	0.287	Nucleus	other
SF3B1	splicing factor 3b subunit 1	SF3B1	SF3B1	SF3B1	0.014	0.828	0.139	0.53	0.154	0.037	Nucleus	other		H3B-8800
SF3B2	splicing factor 3b subunit 2	SF3B2	SF3B2	SF3B2	-0.163	0.467	0.099	0.597	0.089	0.536	Nucleus	other
SF3B3	splicing factor 3b subunit 3	SF3B3	SF3B3	SF3B3	0.003	0.975	0.099	0.477	0.032	0.686	Nucleus	other	unspecified application
SFN	stratifin	SFN	SFN	SFN	-0.182	0.853	-0.278	0.655	-0.064	0.941	Cytoplasm	other	prognosis
SFPQ	splicing factor proline and glutamine rich	SFPQ	SFPQ	SFPQ	0.015	0.825	0.165	0.0739	0.075	0.175	Nucleus	other
SFRP1	secreted frizzled related protein 1	SFRP1	SFRP1	SFRP1	0.253	0.406	0.099	0.713	0.203	0.0969	Plasma Membrane	transmembrane receptor	diagnosis,prognosis
SFRP4	secreted frizzled related protein 4	SFRP4	SFRP4	SFRP4	0.171	0.167	0.122	0.521	0.375	0.305	Plasma Membrane	transmembrane receptor	diagnosis
SFXN1	sideroflexin 1	SFXN1	SFXN1	SFXN1	-0.277	0.312	0.75	0.441	0.034	0.977	Cytoplasm	transporter
SFXN3	sideroflexin 3	SFXN3	SFXN3	SFXN3	-0.259	0.727	0.508	0.413	-0.029		Cytoplasm	transporter
SH3BGRL3	SH3 domain binding glutamate rich protein like 3	SH3BGRL3	SH3BGRL3	SH3BGRL3	-0.108	0.643	-0.148	0.539	-0.196	0.594	Nucleus	other
SH3BGRL	SH3 domain binding glutamate rich protein like	SH3BGRL	SH3BGRL	SH3BGRL	0.004	0.928	0.08	0.792	0.148	0.532	Cytoplasm	other
SH3BP1	SH3 domain binding protein 1	SH3BP1	SH3BP1	SH3BP1	-0.406	0.221	-0.276	0.327	-0.201	0.385	Plasma Membrane	other
SH3GL1	SH3 domain containing GRB2 like 1, endophilin A2	SH3GL1	SH3GL1	SH3GL1	0.176	0.0362	0.235	0.0828	0.034	0.686	Cytoplasm	other
SH3GLB1	SH3 domain containing GRB2 like, endophilin B1	SH3GLB1	SH3GLB1	SH3GLB1	-0.175	0.315	0.076	0.547	0.12	0.193	Cytoplasm	enzyme
SH3GLB2	SH3 domain containing GRB2 like, endophilin B2	SH3GLB2	SH3GLB2	SH3GLB2	0.08	0.681	0.243	0.416	0.327	0.139	Cytoplasm	other
SH3PXD2B	SH3 and PX domains 2B	SH3PXD2B	SH3PXD2B	SH3PXD2B	0.042	0.534	0.235	0.175	0.059	0.508	Cytoplasm	other
SHMT2	serine hydroxymethyltransferase 2	SHMT2	SHMT2	SHMT2	0.027	0.778	0.002	0.993	-0.02	0.941	Cytoplasm	enzyme
SKP1	S-phase kinase associated protein 1	SKP1	SKP1	SKP1	0.049	0.739	0.124	0.423	-0.112	0.183	Nucleus	transcription regulator
SLC1A5	solute carrier family 1 member 5	SLC1A5	SLC1A5	SLC1A5	-0.078	0.846	-0.109	0.605	0.121	0.17	Plasma Membrane	transporter
SLC25A1	solute carrier family 25 member 1	SLC25A1	SLC25A1	SLC25A1	-0.158	0.207	0.053	0.744	-0.047	0.315	Other	transporter
SLC25A3	solute carrier family 25 member 3	SLC25A3	SLC25A3	SLC25A3	-0.155	0.596	0.126	0.706	0.156	0.381	Cytoplasm	transporter
SLC25A4	solute carrier family 25 member 4	SLC25A4	SLC25A4	SLC25A4	0.175	0.0847	0.457	0.466	0.182	0.566	Cytoplasm	transporter		clodronic acid
SLC25A5	solute carrier family 25 member 5	SLC25A5	SLC25A5	SLC25A5	-0.335	0.234	-0.161	0.455	-0.078	0.683	Cytoplasm	transporter		clodronic acid
SLC25A6	solute carrier family 25 member 6	SLC25A6	SLC25A6	SLC25A6	0.006	0.979	0.06	0.892	-0.087	0.7	Cytoplasm	transporter		clodronic acid
SLC25A11	solute carrier family 25 member 11	SLC25A11	SLC25A11	SLC25A11	-0.195	0.55	-0.115	0.695	0.095	0.752	Cytoplasm	transporter
SLC25A12	solute carrier family 25 member 12	SLC25A12	SLC25A12	SLC25A12	-0.119		-0.31		-0.095		Cytoplasm	transporter
SLC25A24	solute carrier family 25 member 24	SLC25A24	SLC25A24	SLC25A24	-0.007	0.938	0.005	0.964	-0.028	0.813	Cytoplasm	transporter
SLC2A1	solute carrier family 2 member 1	SLC2A1	SLC2A1	SLC2A1	0.132	0.705	0.408	0.246	0.046	0.807	Plasma Membrane	transporter	diagnosis,efficacy
SLC3A2	solute carrier family 3 member 2	SLC3A2	SLC3A2	SLC3A2	-0.128	0.529	0.008	0.969	-0.261	0.357	Plasma Membrane	transporter
SLC4A1	solute carrier family 4 member 1 (Diego blood group)	SLC4A1	SLC4A1	SLC4A1	-0.195	0.568	0.434	0.609	0.253	0.717	Plasma Membrane	transporter
SLC9A3R1	SLC9A3 regulator 1	SLC9A3R1	SLC9A3R1	SLC9A3R1	0.053	0.808	0.166	0.0799	-0.095	0.363	Plasma Membrane	other
SLK	STE20 like kinase	SLK	SLK	SLK	0.032	0.882	0.17	0.226	0.167	0.23	Nucleus	kinase
SLMAP	sarcolemma associated protein	SLMAP	SLMAP	SLMAP	0.875	0.137	1.33	0.0196	0.904	0.0295	Plasma Membrane	other
SLPI	secretory leukocyte peptidase inhibitor	SLPI	SLPI	SLPI	-0.009	0.979	0.013	0.972	-0.714	0.113	Cytoplasm	other	diagnosis,prognosis
SMARCA2	SWI/SNF related, matrix associated, actin dependent regulator of chromatin, subfamily a, member 2	SMARCA2	SMARCA2	SMARCA2	-0.032	0.854	0.055	0.585	-0.275	0.524	Nucleus	transcription regulator
SMARCA5	SWI/SNF related, matrix associated, actin dependent regulator of chromatin, subfamily a, member 5	SMARCA5	SMARCA5	SMARCA5	-0.085	0.556	0.127	0.492	-0.009	0.957	Nucleus	transcription regulator
SMARCC1	SWI/SNF related, matrix associated, actin dependent regulator of chromatin subfamily c member 1	SMARCC1	SMARCC1	SMARCC1	-0.089		-0.132		-0.002		Nucleus	transcription regulator
SMARCC2	SWI/SNF related, matrix associated, actin dependent regulator of chromatin subfamily c member 2	SMARCC2	SMARCC2	SMARCC2	0.165	0.316	0.321	0.206	0.061	0.743	Nucleus	transcription regulator
SMARCE1	SWI/SNF related, matrix associated, actin dependent regulator of chromatin, subfamily e, member 1	SMARCE1	SMARCE1	SMARCE1	-0.03	0.673	0.038	0.72	0.091	0.595	Nucleus	transcription regulator
SMC3	structural maintenance of chromosomes 3	SMC3	SMC3	SMC3	0.036	0.537	0.167	0.14	0.058	0.703	Nucleus	other
SMC1A	structural maintenance of chromosomes 1A	SMC1A	SMC1A	SMC1A	-0.043	0.723	0.002	0.976	0.152	0.391	Nucleus	transporter
SMS	spermine synthase	SMS	SMS	SMS	-0.164	0.24	0.187	0.41	0.126	0.568	Cytoplasm	enzyme		(±)-2-hydroxyoleic acid
SMTN	smoothelin	SMTN	SMTN	SMTN	0.226	0.781	0.285	0.82	0.368	0.734	Extracellular Space	other	unspecified application
SNAP23	synaptosome associated protein 23	SNAP23	SNAP23	SNAP23	-0.126	0.314	0.115	0.107	0.071	0.556	Plasma Membrane	transporter
SNCG	synuclein gamma	SNCG	SNCG	SNCG	0.13	0.202	0.254	0.168	-0.092	0.577	Cytoplasm	other	unspecified application
SND1	staphylococcal nuclease and tudor domain containing 1	SND1	SND1	SND1	-0.058	0.643	-0.038	0.707	-0.009	0.903	Nucleus	enzyme	unspecified application
SNRNP70	small nuclear ribonucleoprotein U1 subunit 70	SNRNP70	SNRNP70	SNRNP70	-0.068	0.387	0.132	0.456	-0.113	0.402	Nucleus	other
SNRNP200	small nuclear ribonucleoprotein U5 subunit 200	SNRNP200	SNRNP200	SNRNP200	-0.147	0.201	0.117	0.654	0.046	0.68	Nucleus	enzyme
SNRPA1	small nuclear ribonucleoprotein polypeptide A'	SNRPA1	SNRPA1	SNRPA1	0.243	0.0428	0.587	0.385	0.447	0.308	Nucleus	other
SNRPA	small nuclear ribonucleoprotein polypeptide A	SNRPA	SNRPA	SNRPA	-0.012	0.919	0.138	0.267	0.144	0.521	Nucleus	other
SNRPB2	small nuclear ribonucleoprotein polypeptide B2	SNRPB2	SNRPB2	SNRPB2	-0.544		-0.79		-0.602		Nucleus	other
SNRPB	small nuclear ribonucleoprotein polypeptides B and B1	SNRPB	SNRPB	SNRPB	0.049	0.445	0.169	0.313	0.054	0.722	Nucleus	other
SNRPD2	small nuclear ribonucleoprotein D2 polypeptide	SNRPD2	SNRPD2	SNRPD2	0.008	0.784	-0.128	0.545	-0.004	0.954	Nucleus	other
SNRPD3	small nuclear ribonucleoprotein D3 polypeptide	SNRPD3	SNRPD3	SNRPD3	-0.138	0.254	-0.058	0.714	-0.144	0.251	Nucleus	other
SNTB2	syntrophin beta 2	SNTB2	SNTB2	SNTB2	0.012	0.918	0.183	0.612	0.232	0.57	Plasma Membrane	other
SNU13	small nuclear ribonucleoprotein 13	NHP2L1	NHP2L1	NHP2L1	0.228	0.0424	0.301	0.181	0.142	0.346	Nucleus	other
SNX1	sorting nexin 1	SNX1	SNX1	SNX1	0.062	0.625	0.125	0.125	0.052	0.694	Cytoplasm	transporter
SNX2	sorting nexin 2	SNX2	SNX2	SNX2	-0.007	0.969	-0.164	0.546	-0.152	0.449	Cytoplasm	transporter
SNX3	sorting nexin 3	SNX3	SNX3	SNX3	-0.053	0.571	-0.015	0.903	-0.037	0.787	Cytoplasm	transporter
SNX5	sorting nexin 5	SNX5	SNX5	SNX5	-0.029	0.668	-0.183	0.154	-0.039	0.694	Cytoplasm	transporter
SNX6	sorting nexin 6	SNX6	SNX6	SNX6	0.014	0.92	0.098	0.526	-0.045	0.795	Cytoplasm	transporter
SNX9	sorting nexin 9	SNX9	SNX9	SNX9	0.085	0.272	0.001	0.996	0.099	0.545	Cytoplasm	transporter
SNX12	sorting nexin 12	SNX12	SNX12	SNX12	-0.205	0.0356	-0.115	0.522	-0.173	0.488	Cytoplasm	transporter
SNX18	sorting nexin 18	SNX18	SNX18	SNX18	-0.079		0.485		-0.139		Cytoplasm	transporter
SOD1	superoxide dismutase 1	SOD1	SOD1	SOD1	0.016	0.898	0.148	0.573	0.102	0.663	Cytoplasm	enzyme	unspecified application
SOD2	superoxide dismutase 2	SOD2	SOD2	SOD2	-0.187	0.528	0.026	0.906	0.059	0.85	Cytoplasm	enzyme	diagnosis,unspecified application
SOD3	superoxide dismutase 3	SOD3	SOD3	SOD3	0.096	0.629	0.194	0.66	0.225	0.479	Extracellular Space	enzyme
SORBS1	sorbin and SH3 domain containing 1	SORBS1	SORBS1	SORBS1	-0.039	0.896	0.283	0.569	0.29	0.567	Plasma Membrane	other
SORBS2	sorbin and SH3 domain containing 2	SORBS2	SORBS2	SORBS2	0.02	0.817	0.134	0.587	0.187	0.485	Plasma Membrane	other
SORBS3	sorbin and SH3 domain containing 3	SORBS3	SORBS3	SORBS3	-0.033	0.308	0.298	0.333	0.103	0.317	Cytoplasm	other
SORD	sorbitol dehydrogenase	SORD	SORD	SORD	-0.232	0.165	-0.249	0.362	-0.546	0.0479	Cytoplasm	enzyme
SP100	SP100 nuclear antigen	SP100	SP100	SP100	-0.033	0.819	0.27	0.107	0.158	0.575	Nucleus	transcription regulator
SPARC	secreted protein acidic and cysteine rich	SPARC	SPARC	SPARC	0.316	0.109	0.276	0.147	0.329	0.214	Extracellular Space	other	disease progression,efficacy
SPCS2	signal peptidase complex subunit 2	SPCS2	SPCS2	SPCS2	0.038	0.92	0.267	0.623	-0.25	0.739	Cytoplasm	other
SPCS3	signal peptidase complex subunit 3	SPCS3	SPCS3	SPCS3	-0.155	0.665	-0.436	0.529	-0.407	0.607	Cytoplasm	peptidase
SPINK5	serine peptidase inhibitor Kazal type 5	SPINK5	SPINK5	SPINK5	0.346	0.567	0.786	0.0336	-0.017	0.961	Extracellular Space	other	unspecified application
SPON1	spondin 1	SPON1	SPON1	SPON1	0.428	0.0147	0.146	0.689	0.165	0.304	Extracellular Space	other
SPR	sepiapterin reductase	SPR	SPR	SPR	0.195	0.104	0.206	0.114	0.165	0.234	Cytoplasm	enzyme
SPRR3	small proline rich protein 3	SPRR3	SPRR3	SPRR3	0.345	0.694	0.288	0.682	-0.075	0.92	Cytoplasm	other
SPRR1A	small proline rich protein 1A	SPRR1A	SPRR1A	SPRR1A	1.745	0.398	0.761	0.211	0.442	0.0623	Plasma Membrane	other
SPRR1B	small proline rich protein 1B	SPRR1B	SPRR1B	SPRR1B	0.512	0.819	0.342	0.744	0.694		Cytoplasm	other
SPRR2A	small proline rich protein 2A	SPRR2A	SPRR2A	SPRR2A	-0.315	0.717	0.407	0.443	-0.634	0.449	Cytoplasm	other
SPRR2E	small proline rich protein 2E	SPRR2E	SPRR2E	SPRR2E	1.31		0.658		1.209		Cytoplasm	other
SPTAN1	spectrin alpha, non-erythrocytic 1	SPTAN1	SPTAN1	SPTAN1	-0.056	0.456	0.013	0.83	0.039	0.617	Plasma Membrane	other
SPTB	spectrin beta, erythrocytic	SPTB	SPTB	SPTB	-0.567	0.332	0.057	0.828	0.585	0.721	Plasma Membrane	other
SPTBN1	spectrin beta, non-erythrocytic 1	SPTBN1	SPTBN1	SPTBN1	-0.149	0.223	0.053	0.627	-0.01	0.773	Plasma Membrane	other
SPTBN2	spectrin beta, non-erythrocytic 2	SPTBN2	SPTBN2	SPTBN2	0.498	0.0851	0.478	0.354	0.132	0.641	Cytoplasm	other
SQOR	sulfide quinone oxidoreductase	SQRDL	SQRDL	SQRDL	-0.33	0.37	-0.48	0.381	-0.734	0.458	Cytoplasm	enzyme
SRI	sorcin	SRI	SRI	SRI	-0.043	0.683	0.102	0.525	0.076	0.621	Cytoplasm	transporter
SRM	spermidine synthase	SRM	SRM	SRM	-0.064	0.654	-0.019	0.83	0.055	0.611	Cytoplasm	enzyme
SRP9	signal recognition particle 9	SRP9	SRP9	SRP9	0.132	0.379	0.098	0.608	0.043	0.517	Cytoplasm	other
SRP14	signal recognition particle 14	SRP14	SRP14	SRP14	-0.139	0.297	-0.062	0.726	-0.063	0.701	Cytoplasm	other
SRP54	signal recognition particle 54	SRP54	SRP54	SRP54	-0.464	0.0594	-0.021	0.788	-0.095	0.51	Cytoplasm	enzyme
SRP68	signal recognition particle 68	SRP68	SRP68	SRP68	-0.285	0.206	-0.036	0.834	-0.033	0.786	Nucleus	other
SRP72	signal recognition particle 72	SRP72	SRP72	SRP72	0.025	0.818	0.17	0.188	-0.066	0.692	Nucleus	kinase
SRPRB	SRP receptor subunit beta	SRPRB	SRPRB	SRPRB	-0.423	0.305	0.314	0.356	0.094	0.544	Cytoplasm	other
SRPX	sushi repeat containing protein X-linked	SRPX	SRPX	SRPX	0.544	0.279	1.524	0.263	0.955	0.432	Cytoplasm	other
SRRT	serrate, RNA effector molecule	SRRT	SRRT	SRRT	0.085	0.504	0.127	0.456	0.226	0.0296	Nucleus	other
SRSF1	serine and arginine rich splicing factor 1	SRSF1	SRSF1	SRSF1	0.016	0.831	0.147	0.168	0.097	0.447	Nucleus	other
SRSF2	serine and arginine rich splicing factor 2	SRSF2	SRSF2	SRSF2	0.103	0.787	0.183	0.493	-0.078	0.713	Nucleus	transcription regulator
SRSF3	serine and arginine rich splicing factor 3	SRSF3	SRSF3	SRSF3	0.083	0.523	0.044	0.566	0.127	0.0693	Nucleus	other
SRSF4	serine and arginine rich splicing factor 4	SRSF4	SRSF4	SRSF4	0.199	0.166	0.596	0.182	0.225	0.364	Nucleus	other
SRSF5	serine and arginine rich splicing factor 5	SRSF5	SRSF5	SRSF5	0.067	0.631	0.372	0.0285	-0.192	0.302	Nucleus	other
SRSF7	serine and arginine rich splicing factor 7	SRSF7	SRSF7	SRSF7	0	0.999	0.036	0.801	0.07	0.724	Nucleus	other
SRSF9	serine and arginine rich splicing factor 9	SRSF9	SRSF9	SRSF9	0.108	0.0832	0.136	0.35	0.133	0.541	Nucleus	enzyme
SRSF10	serine and arginine rich splicing factor 10	SRSF10	SRSF10	SRSF10	0.081	0.218	0.151	0.449	0.21	0.277	Nucleus	other
SSB	small RNA binding exonuclease protection factor La	SSB	SSB	SSB	-0.022	0.802	-0.059	0.654	0.029	0.745	Nucleus	enzyme
SSBP1	single stranded DNA binding protein 1	SSBP1	SSBP1	SSBP1	-0.093	0.302	0.035	0.607	-0.032	0.774	Cytoplasm	other
SSR1	signal sequence receptor subunit 1	SSR1	SSR1	SSR1	-0.407	0.366	0.243	0.631	-0.106	0.731	Cytoplasm	other
SSR4	signal sequence receptor subunit 4	SSR4	SSR4	SSR4	-0.139	0.595	-0.214	0.598	-0.165	0.619	Cytoplasm	other
SSRP1	structure specific recognition protein 1	SSRP1	SSRP1	SSRP1	-0.203	0.283	-0.126	0.572	-0.151	0.386	Nucleus	transcription regulator
ST13	ST13 Hsp70 interacting protein	ST13	ST13	ST13	-0.088	0.247	0.024	0.872	0.051	0.709	Cytoplasm	other
STAG1	stromal antigen 1	STAG1	STAG1	STAG1	-0.182	0.56	0.325	0.565	0.096	0.832	Nucleus	other
STAM2	signal transducing adaptor molecule 2	STAM2	STAM2	STAM2	-0.078	0.678	0.456	0.088	-0.017	0.926	Cytoplasm	other
STAM	signal transducing adaptor molecule	STAM	STAM	STAM	-0.168	0.62	0.06	0.909	0.001	0.995	Cytoplasm	other
STARD10	StAR related lipid transfer domain containing 10	STARD10	STARD10	STARD10	0.189	0.517	0.492	0.291	0.074	0.84	Cytoplasm	other
STAT1	signal transducer and activator of transcription 1	STAT1	STAT1	STAT1	-0.21	0.525	0.164	0.733	-0.141	0.723	Nucleus	transcription regulator	diagnosis,efficacy,prognosis,response to therapy
STAT3	signal transducer and activator of transcription 3	STAT3	STAT3	STAT3	-0.836	0.295	-0.097	0.908	-0.18	0.209	Nucleus	transcription regulator	diagnosis,efficacy,prognosis,response to therapy	danvatirsen,golotimod,OPB-31121,OPB-51602,STAT3 inhibitor,TTI-101
STAT5A	signal transducer and activator of transcription 5A	STAT5A	STAT5A	STAT5A	0.158	0.368	1.323	0.169	0.603	0.297	Nucleus	transcription regulator	response to therapy
STAU1	staufen double-stranded RNA binding protein 1	STAU1	STAU1	STAU1	0.215	0.597	0.301	0.345	-0.068	0.75	Cytoplasm	transporter
STIM1	stromal interaction molecule 1	STIM1	STIM1	STIM1	0.123	0.752	0.076	0.841	0.331	0.218	Plasma Membrane	ion channel
STING1	stimulator of interferon response cGAMP interactor 1	TMEM173	TMEM173	TMEM173	-0.135	0.658	0.036	0.905	0.089	0.446	Cytoplasm	other		GSK3745417,IMSA101,MIW815,MK-1454,SB 11285
STIP1	stress induced phosphoprotein 1	STIP1	STIP1	STIP1	-0.024	0.377	0.102	0.556	0.061	0.724	Cytoplasm	other		lavendustin C
STK3	serine/threonine kinase 3	STK3	STK3	STK3	-0.341	0.0912	-0.299	0.419	-0.184	0.607	Cytoplasm	kinase
STK4	serine/threonine kinase 4	STK4	STK4	STK4	-0.254	0.385	-0.597	0.294	-0.149	0.66	Cytoplasm	kinase
STK24	serine/threonine kinase 24	STK24	STK24	STK24	0.021		0.151		-0.097		Cytoplasm	kinase		bosutinib,bosutinib/imatinib,bosutinib/ponatinib,bosutinib/rituximab
STK39	serine/threonine kinase 39	STK39	STK39	STK39	0.394	0.457	0	0.99	0.183	0.563	Nucleus	kinase
STMN1	stathmin 1	STMN1	STMN1	STMN1	0.135	0.401	0.24	0.173	0.032	0.802	Cytoplasm	other	efficacy
STOM	stomatin	STOM	STOM	STOM	-0.415	0.379	0.048	0.911	-0.103	0.599	Plasma Membrane	other
STOML2	stomatin like 2	STOML2	STOML2	STOML2	0.035	0.91	0.125	0.718	-0.165	0.305	Plasma Membrane	other	prognosis
STRAP	serine/threonine kinase receptor associated protein	STRAP	STRAP	STRAP	-0.146	0.218	0.01	0.893	-0.007	0.944	Plasma Membrane	other
STT3A	STT3 oligosaccharyltransferase complex catalytic subunit A	STT3A	STT3A	STT3A	-0.167	0.629	0.095	0.812	-0.032	0.869	Plasma Membrane	enzyme
STT3B	STT3 oligosaccharyltransferase complex catalytic subunit B	STT3B	STT3B	STT3B	-0.016	0.947	0.128	0.757	0.11	0.5	Cytoplasm	enzyme
STX4	syntaxin 4	STX4	STX4	STX4	0.333		0.781		-0.139		Plasma Membrane	transporter
STX5	syntaxin 5	STX5	STX5	STX5	-0.138	0.59	0.148	0.616	0.089	0.57	Cytoplasm	transporter
STXBP1	syntaxin binding protein 1	STXBP1	STXBP1	STXBP1	-0.061	0.632	-0.052	0.687	-0.008	0.945	Cytoplasm	transporter
STXBP2	syntaxin binding protein 2	STXBP2	STXBP2	STXBP2	0.045	0.837	0.361	0.148	0.186	0.362	Plasma Membrane	transporter
STXBP3	syntaxin binding protein 3	STXBP3	STXBP3	STXBP3	0.129	0.264	0.205	0.173	0.117	0.545	Plasma Membrane	transporter
SUB1	SUB1 regulator of transcription	SUB1	SUB1	SUB1	-0.152	0.44	-0.091	0.607	-0.098	0.688	Nucleus	transcription regulator
SUCLA2	succinate-CoA ligase ADP-forming subunit beta	SUCLA2	SUCLA2	SUCLA2	-0.189	0.212	0.093	0.391	-0.014	0.853	Cytoplasm	enzyme
SUCLG1	succinate-CoA ligase GDP/ADP-forming subunit alpha	SUCLG1	SUCLG1	SUCLG1	-0.141	0.0628	-0.109	0.482	-0.15	0.322	Cytoplasm	enzyme
SUCLG2	succinate-CoA ligase GDP-forming subunit beta	SUCLG2	SUCLG2	SUCLG2	-0.093	0.381	0.067	0.555	-0.129	0.302	Cytoplasm	enzyme
SUN1	Sad1 and UNC84 domain containing 1	SUN1	SUN1	SUN1	0.144	0.176	0.461	0.0151	0.169	0.417	Nucleus	other
SUN2	Sad1 and UNC84 domain containing 2	SUN2	SUN2	SUN2	-0.238	0.434	0.204	0.49	0.144	0.515	Nucleus	other
SUPT16H	SPT16 homolog, facilitates chromatin remodeling subunit	SUPT16H	SUPT16H	SUPT16H	-0.025	0.904	-0.038	0.863	-0.039	0.869	Nucleus	transcription regulator
SURF4	surfeit 4	SURF4	SURF4	SURF4	-0.365	0.221	0.159	0.613	-0.048	0.669	Cytoplasm	other
SUSD2	sushi domain containing 2	SUSD2	SUSD2	SUSD2	-0.186	0.511	-0.004	0.947	0.097	0.131	Extracellular Space	other
SWAP70	switching B cell complex subunit SWAP70	SWAP70	SWAP70	SWAP70	-0.098	0.666	0.095	0.347	0.011	0.939	Cytoplasm	other
SYMPK	symplekin	SYMPK	SYMPK	SYMPK	-0.002	0.998	0.138	0.318	0.044	0.877	Cytoplasm	other
SYNCRIP	synaptotagmin binding cytoplasmic RNA interacting protein	SYNCRIP	SYNCRIP	SYNCRIP	-0.05	0.39	-0.042	0.55	-0.056	0.616	Nucleus	other		supinoxin
SYNE1	spectrin repeat containing nuclear envelope protein 1	SYNE1	SYNE1	SYNE1	-0.006	0.984	0.245	0.433	0.142	0.676	Nucleus	other
SYNE2	spectrin repeat containing nuclear envelope protein 2	SYNE2	SYNE2	SYNE2	-0.292	0.175	-0.136	0.585	-0.15	0.423	Nucleus	other
SYNPO2	synaptopodin 2	SYNPO2	SYNPO2	SYNPO2	0.052	0.687	0.245	0.432	0.258	0.367	Cytoplasm	other
TACSTD2	tumor associated calcium signal transducer 2	TACSTD2	TACSTD2	TACSTD2	0.994	0.0738	0.633	0.176	0.651	0.122	Plasma Membrane	other		datopotamab deruxtecan,PF-06664178,sacituzumab govitecan,SKB264
TAF15	TATA-box binding protein associated factor 15	TAF15	TAF15	TAF15	0.069	0.607	-0.09	0.578	0.066	0.528	Nucleus	other
TAGLN2	transgelin 2	TAGLN2	TAGLN2	TAGLN2	-0.105	0.612	-0.268	0.13	-0.085	0.727	Cytoplasm	other
TAGLN	transgelin	TAGLN	TAGLN	TAGLN	0.082	0.867	-0.05	0.956	0.372	0.649	Cytoplasm	other	diagnosis
TALDO1	transaldolase 1	TALDO1	TALDO1	TALDO1	-0.019	0.895	-0.002	0.966	-0.111	0.534	Cytoplasm	enzyme
TARDBP	TAR DNA binding protein	TARDBP	TARDBP	TARDBP	0.111	0.292	0.002	0.992	0	0.997	Nucleus	transcription regulator	unspecified application
TARS1	threonyl-tRNA synthetase 1	TARS	TARS	TARS	-0.238	0.148	-0.302	0.384	-0.264	0.143	Nucleus	enzyme
TBC1D9B	TBC1 domain family member 9B	TBC1D9B	TBC1D9B	TBC1D9B	0.027	0.895	0.144	0.266	0.01	0.713	Other	other
TBCA	tubulin folding cofactor A	TBCA	TBCA	TBCA	0.079	0.104	0.189	0.0837	0.2	0.147	Cytoplasm	other
TBCB	tubulin folding cofactor B	TBCB	TBCB	TBCB	-0.032	0.758	0.103	0.431	0.072	0.73	Cytoplasm	other
TCEA1	transcription elongation factor A1	TCEA1	TCEA1	TCEA1	-0.032	0.899	0.272	0.098	0.054	0.563	Nucleus	transcription regulator
TCEAL5	transcription elongation factor A like 5	TCEAL5	TCEAL5	TCEAL5	-0.253		-0.25		0.066		Other	other
TCOF1	treacle ribosome biogenesis factor 1	TCOF1	TCOF1	TCOF1	0.015	0.974	-0.107	0.89	-0.019	0.973	Nucleus	transporter
TCP1	t-complex 1	TCP1	TCP1	TCP1	-0.042	0.595	0.049	0.766	0.108	0.31	Cytoplasm	other
TECR	trans-2,3-enoyl-CoA reductase	TECR	TECR	TECR	-0.136	0.587	-0.116	0.822	-0.293	0.409	Plasma Membrane	enzyme
TES	testin LIM domain protein	TES	TES	TES	0.043	0.912	0.222	0.113	0.291	0.304	Plasma Membrane	other
TF	transferrin	TF	TF	TF	0.107	0.728	0.115	0.784	-0.025	0.92	Extracellular Space	transporter	efficacy,prognosis,safety,unspecified application	ferric carboxymaltose,MORAb-066,NKP-1339
TFAM	transcription factor A, mitochondrial	TFAM	TFAM	TFAM	0.078	0.58	0.386	0.196	0.44	0.316	Cytoplasm	transcription regulator
TFG	trafficking from ER to golgi regulator	TFG	TFG	TFG	-0.017	0.902	0.1	0.425	0.044	0.751	Cytoplasm	other
TFRC	transferrin receptor	TFRC	TFRC	TFRC	0.017	0.973	0.071	0.838	0.165	0.684	Plasma Membrane	transporter	diagnosis,efficacy	CALAA-01,CX-2029,monoclonal antibody A27.15
TGFB1I1	transforming growth factor beta 1 induced transcript 1	TGFB1I1	TGFB1I1	TGFB1I1	0.181	0.505	0.293	0.631	0.444	0.403	Nucleus	transcription regulator
TGFBI	transforming growth factor beta induced	TGFBI	TGFBI	TGFBI	-0.216	0.371	-0.159	0.0886	0.087	0.626	Extracellular Space	other
TGM1	transglutaminase 1	TGM1	TGM1	TGM1	-0.434	0.646	-0.005	0.993	-0.506	0.533	Plasma Membrane	enzyme
TGM2	transglutaminase 2	TGM2	TGM2	TGM2	0.057	0.628	-0.011	0.89	-0.008	0.967	Cytoplasm	enzyme
TGM3	transglutaminase 3	TGM3	TGM3	TGM3	0.451	0.204	0.342	0.456	-0.022	0.968	Cytoplasm	enzyme	unspecified application
TGOLN2	trans-golgi network protein 2	TGOLN2	TGOLN2	TGOLN2	-0.023	0.856	0.447	0.115	0.14	0.611	Cytoplasm	other
THBS1	thrombospondin 1	THBS1	THBS1	THBS1	0.059	0.841	0.169	0.567	0.104	0.754	Extracellular Space	other	diagnosis,efficacy
THBS2	thrombospondin 2	THBS2	THBS2	THBS2	0.117	0.738	0.296	0.415	0.472	0.0784	Extracellular Space	other
THOC1	THO complex 1	THOC1	THOC1	THOC1	0.005		0.282		1.704		Nucleus	transcription regulator	prognosis
THRAP3	thyroid hormone receptor associated protein 3	THRAP3	THRAP3	THRAP3	0.014	0.914	0.563	0.125	0.315	0.273	Nucleus	transcription regulator
THY1	Thy-1 cell surface antigen	THY1	THY1	THY1	0.017	0.959	0.2	0.382	0.124	0.706	Plasma Membrane	other	diagnosis,disease progression
THYN1	thymocyte nuclear protein 1	THYN1	THYN1	THYN1	0.094	0.811	-0.225	0.374	-0.146	0.644	Nucleus	other
TIMM13	translocase of inner mitochondrial membrane 13	TIMM13	TIMM13	TIMM13	-0.043	0.715	0.201	0.106	0.2	0.285	Cytoplasm	transporter
TIMM44	translocase of inner mitochondrial membrane 44	TIMM44	TIMM44	TIMM44	0.182	0.147	0.659	0.102	0.211	0.587	Cytoplasm	transporter
TIMP1	TIMP metallopeptidase inhibitor 1	TIMP1	TIMP1	TIMP1	-0.103	0.643	0.517	0.354	0.195	0.44	Extracellular Space	cytokine	diagnosis,disease progression,efficacy,prognosis,unspecified application
TINAGL1	tubulointerstitial nephritis antigen like 1	TINAGL1	TINAGL1	TINAGL1	-0.071	0.761	-0.047	0.923	0.18	0.633	Extracellular Space	transporter
TJP1	tight junction protein 1	TJP1	TJP1	TJP1	0.008	0.963	0.276	0.0665	0.076	0.24	Plasma Membrane	other
TJP2	tight junction protein 2	TJP2	TJP2	TJP2	0.134	0.737	0.107	0.658	0.249	0.257	Plasma Membrane	kinase
TKFC	triokinase and FMN cyclase	DAK	DAK	DAK	-0.05	0.566	0.271	0.164	-0.014	0.942	Cytoplasm	kinase
TKT	transketolase	TKT	TKT	TKT	-0.173	0.117	-0.127	0.244	-0.189	0.2	Cytoplasm	enzyme
TLN1	talin 1	TLN1	TLN1	TLN1	-0.067	0.673	0.141	0.502	0.162	0.475	Plasma Membrane	other	unspecified application
TLN2	talin 2	TLN2	TLN2	TLN2	0.015	0.92	0.452	0.156	0.357	0.234	Nucleus	other
TM9SF2	transmembrane 9 superfamily member 2	TM9SF2	TM9SF2	TM9SF2	-0.459	0.633	-0.471	0.469	-0.514	0.0138	Plasma Membrane	transporter
TMA16	translation machinery associated 16 homolog	TMA16	TMA16	TMA16	-0.134		-0.078		-1.044		Nucleus	other
TMED2	transmembrane p24 trafficking protein 2	TMED2	TMED2	TMED2	-0.116	0.567	0.175	0.507	0.045	0.805	Cytoplasm	transporter
TMED4	transmembrane p24 trafficking protein 4	TMED4	TMED4	TMED4	0.072	0.224	0.616	0.27	0.243	0.434	Cytoplasm	transporter
TMED5	transmembrane p24 trafficking protein 5	TMED5	TMED5	TMED5	-0.027	0.909	0.233	0.533	-0.001	0.998	Cytoplasm	other
TMED7	transmembrane p24 trafficking protein 7	TMED7	TMED7	TMED7	-0.07	0.689	0.079	0.649	0.155	0.426	Cytoplasm	transporter
TMED9	transmembrane p24 trafficking protein 9	TMED9	TMED9	TMED9	-0.149	0.563	-0.165	0.702	-0.124	0.655	Cytoplasm	transporter
TMED10	transmembrane p24 trafficking protein 10	TMED10	TMED10	TMED10	-0.064	0.605	0.106	0.65	0.061	0.6	Cytoplasm	transporter
TMEM43	transmembrane protein 43	TMEM43	TMEM43	TMEM43	-0.114	0.668	0.278	0.55	0.059	0.5	Nucleus	other
TMEM109	transmembrane protein 109	TMEM109	TMEM109	TMEM109	-0.256	0.292	0.376	0.396	0.276	0.178	Cytoplasm	other
TMEM205	transmembrane protein 205	TMEM205	TMEM205	TMEM205	-0.029	0.917	0.153	0.573	-0.172	0.414	Cytoplasm	other
TMOD1	tropomodulin 1	TMOD1	TMOD1	TMOD1	-0.087	0.662	-0.022	0.929	0.101	0.514	Cytoplasm	enzyme
TMOD3	tropomodulin 3	TMOD3	TMOD3	TMOD3	-0.05	0.721	0.007	0.939	-0.048	0.803	Cytoplasm	other
TMPO	thymopoietin	TMPO	TMPO	TMPO	-0.178	0.283	0.123	0.614	0.074	0.682	Nucleus	other
TMPRSS11E	transmembrane serine protease 11E	TMPRSS11E	TMPRSS11E	TMPRSS11E	0.663		0.405		0.477		Extracellular Space	peptidase
TMX1	thioredoxin related transmembrane protein 1	TMX1	TMX1	TMX1	-0.324	0.299	-0.124	0.541	0.013	0.964	Cytoplasm	enzyme
TMX3	thioredoxin related transmembrane protein 3	TMX3	TMX3	TMX3	0.046	0.918	0.231	0.578	0.11	0.789	Cytoplasm	enzyme
TMX4	thioredoxin related transmembrane protein 4	TMX4	TMX4	TMX4	0.397	0.107	0.928	0.0687	0.737	0.0771	Cytoplasm	enzyme
TNC	tenascin C	TNC	TNC	TNC	-0.383	0.149	-0.257	0.228	-0.035	0.894	Extracellular Space	other	diagnosis,response to therapy	131I-tenatumomab,F16-IL2 fusion protein,iodine I 131 monoclonal antibody F16SIP
TNFAIP2	TNF alpha induced protein 2	TNFAIP2	TNFAIP2	TNFAIP2	-0.043	0.88	0.095	0.763	0.034	0.923	Extracellular Space	other
TNKS1BP1	tankyrase 1 binding protein 1	TNKS1BP1	TNKS1BP1	TNKS1BP1	0.188	0.275	0.475	0.168	0.093	0.455	Nucleus	other
TNPO1	transportin 1	TNPO1	TNPO1	TNPO1	-0.216	0.066	-0.013	0.947	-0.223	0.369	Nucleus	transporter
TNS1	tensin 1	TNS1	TNS1	TNS1	-0.051	0.753	0.179	0.399	0.21	0.499	Plasma Membrane	other
TNS2	tensin 2	TENC1	TENC1	TENC1	0.037	0.903	0.227	0.156	0.234	0.569	Plasma Membrane	enzyme
TNXB	tenascin XB	TNXB	TNXB	TNXB	0.028	0.86	0.083	0.496	0.19	0.115	Extracellular Space	other
TOLLIP	toll interacting protein	TOLLIP	TOLLIP	TOLLIP	0.235	0.247	0.263	0.163	-0.035	0.919	Cytoplasm	other
TOM1	target of myb1 membrane trafficking protein	TOM1	TOM1	TOM1	0.005	0.98	0.644	0.154	0.497	0.0503	Cytoplasm	transporter
TOMM40	translocase of outer mitochondrial membrane 40	TOMM40	TOMM40	TOMM40	-0.028	0.936	0.659	0.0103	0.04	0.732	Cytoplasm	ion channel
TOMM70	translocase of outer mitochondrial membrane 70	TOMM70A	TOMM70A	TOMM70A	0.089	0.666	0.18	0.428	0.21	0.391	Cytoplasm	transporter
TOP1	DNA topoisomerase I	TOP1	TOP1	TOP1	-0.028	0.768	0.182	0.0926	0.129	0.303	Nucleus	enzyme	efficacy	5-fluorouracil/irinotecan,5-fluorouracil/irinotecan/oxaliplatin,aflibercept/irinotecan,batracylin,BAY 56-3722,belotecan,beta-lapachone,bevacizumab/5-fluorouracil/irinotecan/oxaliplatin,bevacizumab/capecitabine/irinotecan,bevacizumab/capecitabine/irinotecan/oxaliplatin,bevacizumab/gimeracil/irinotecan/oxonic acid/tegafur,bevacizumab/irinotecan,bevacizumab/irinotecan/oxaliplatin,bevacizumab/paclita…
TOP2B	DNA topoisomerase II beta	TOP2B	TOP2B	TOP2B	0.115	0.157	-0.018	0.892	0.057	0.0281	Nucleus	enzyme		alemtuzumab/cyclophosphamide/fludarabine phosphate/mitoxantrone,AQ4N,arsenic trioxide/daunorubicin/tretinoin,becatecarin,bevacizumab/etoposide,capecitabine/epirubicin/oxaliplatin,carboplatin/doxorubicin,chlorambucil/epirubicin,chlorambucil/mitoxantrone/prednisone,chlorambucil/mitoxantrone/prednisone/rituximab,chloroquinoxaline sulfonamide,cisplatin/doxorubicin,cisplatin/doxorubicin/ifosfamide,cis…
TOR1AIP1	torsin 1A interacting protein 1	TOR1AIP1	TOR1AIP1	TOR1AIP1	0.002	0.989	0.171	0.332	-0.123	0.497	Nucleus	other
TP53BP1	tumor protein p53 binding protein 1	TP53BP1	TP53BP1	TP53BP1	0.253	0.34	0.618	0.329	0.588	0.263	Nucleus	transcription regulator
TPD52	tumor protein D52	TPD52	TPD52	TPD52	-0.343	0.183	-0.409	0.179	-0.313	0.213	Cytoplasm	other	diagnosis,unspecified application
TPD52L2	TPD52 like 2	TPD52L2	TPD52L2	TPD52L2	-0.139	0.0534	-0.048	0.66	0.006	0.956	Cytoplasm	other	prognosis,unspecified application
TPI1	triosephosphate isomerase 1	TPI1	TPI1	TPI1	-0.062	0.347	-0.211	0.347	-0.081	0.525	Cytoplasm	enzyme	diagnosis,unspecified application
TPM1	tropomyosin 1	TPM1	TPM1	TPM1	0.199	0.711	0.015	0.986	0.32	0.701	Cytoplasm	other	diagnosis
TPM2	tropomyosin 2	TPM2	TPM2	TPM2	0.222	0.72	-0.032	0.978	0.298	0.753	Extracellular Space	other	diagnosis
TPM3	tropomyosin 3	TPM3	TPM3	TPM3	0.012	0.958	-0.067	0.822	0.013	0.965	Cytoplasm	other	diagnosis,unspecified application	AZD-7451
TPM4	tropomyosin 4	TPM4	TPM4	TPM4	-0.058	0.559	-0.062	0.142	0.04	0.762	Cytoplasm	other
TPP1	tripeptidyl peptidase 1	TPP1	TPP1	TPP1	0.14	0.382	0.22	0.357	0.075	0.39	Cytoplasm	peptidase
TPP2	tripeptidyl peptidase 2	TPP2	TPP2	TPP2	-0.112	0.595	0.168	0.574	0.008	0.939	Cytoplasm	peptidase
TPPP3	tubulin polymerization promoting protein family member 3	TPPP3	TPPP3	TPPP3	-0.077	0.593	0.024	0.91	-0.152	0.269	Cytoplasm	other
TPR	translocated promoter region, nuclear basket protein	TPR	TPR	TPR	-0.101	0.229	0.059	0.725	-0.145	0.159	Nucleus	other
TPSAB1/TPSB2	tryptase alpha/beta 1	TPSAB1	TPSAB1	TPSAB1	-0.111	0.73	-0.263	0.116	0.024	0.956	Extracellular Space	peptidase
TPT1	tumor protein, translationally-controlled 1	TPT1	TPT1	TPT1	0.083	0.599	-0.01	0.95	0.009	0.948	Cytoplasm	other
TRA2A	transformer 2 alpha homolog	TRA2A	TRA2A	TRA2A	1.179		0.394		-0.287		Nucleus	other
TRA2B	transformer 2 beta homolog	TRA2B	TRA2B	TRA2B	-0.024	0.902	0.53	0.172	0.305	0.293	Nucleus	other
TRAP1	TNF receptor associated protein 1	TRAP1	TRAP1	TRAP1	0.428	0.247	0.328	0.112	0.22	0.368	Cytoplasm	enzyme
TRAPPC3	trafficking protein particle complex 3	TRAPPC3	TRAPPC3	TRAPPC3	0.237	0.41	0.052	0.898	-0.09	0.7	Cytoplasm	other		birabresib
TRIM25	tripartite motif containing 25	TRIM25	TRIM25	TRIM25	-0.271	0.364	0.015	0.958	-0.014	0.929	Cytoplasm	transcription regulator
TRIM28	tripartite motif containing 28	TRIM28	TRIM28	TRIM28	-0.049	0.521	-0.062	0.565	-0.078	0.474	Nucleus	transcription regulator
TRIM29	tripartite motif containing 29	TRIM29	TRIM29	TRIM29	-0.029	0.967	-0.264	0.658	-0.538	0.548	Cytoplasm	transcription regulator	diagnosis
TRIOBP	TRIO and F-actin binding protein	TRIOBP	TRIOBP	TRIOBP	-0.22	0.313	0.198	0.384	0.159	0.303	Nucleus	other
TRIP6	thyroid hormone receptor interactor 6	TRIP6	TRIP6	TRIP6	0.008		0.05		-0.563		Extracellular Space	cytokine
TSG101	tumor susceptibility 101	TSG101	TSG101	TSG101	0.174	0.148	0.578	0.11	0.056	0.728	Cytoplasm	transcription regulator
TSN	translin	TSN	TSN	TSN	-0.064	0.299	0.145	0.0715	0.084	0.425	Nucleus	other	unspecified application
TSNAX	translin associated factor X	TSNAX	TSNAX	TSNAX	0.098	0.186	0.103	0.529	0.06	0.691	Nucleus	other	diagnosis
TST	thiosulfate sulfurtransferase	TST	TST	TST	-0.071	0.613	0.433	0.0572	-0.066	0.597	Cytoplasm	enzyme
TSTA3	tissue specific transplantation antigen P35B	TSTA3	TSTA3	TSTA3	-0.133	0.543	-0.154	0.638	-0.116	0.697	Plasma Membrane	enzyme
TTLL12	tubulin tyrosine ligase like 12	TTLL12	TTLL12	TTLL12	-0.054	0.718	0.186	0.067	0.049	0.37	Cytoplasm	other
TTR	transthyretin	TTR	TTR	TTR	-0.194	0.241	0.094	0.782	-0.025	0.926	Extracellular Space	transporter	diagnosis,efficacy,prognosis,unspecified application	4'-iodo-4'-deoxydoxorubicin,AG10,anti-transthyretin siRNA ALN-TTR02,inotersen,IONIS-TTR Rx,tafamidis
TUBA1C	tubulin alpha 1c	TUBA1C	TUBA1C	TUBA1C	-0.125	0.187	-0.192	0.211	0.054	0.54	Cytoplasm	other		6-mercaptopurine/vincristine,bevacizumab/docetaxel,bevacizumab/docetaxel/prednisone/thalidomide/zoledronic acid,bevacizumab/paclitaxel,bevacizumab/paclitaxel/pemetrexed,bevacizumab/paclitaxel/topotecan,capecitabine/docetaxel,capecitabine/docetaxel/gemcitabine,capecitabine/docetaxel/oxaliplatin/trastuzumab,cevipabulin,colchicine,colchicine/probenecid,cyclophosphamide/daunorubicin/imatinib/predniso…
TUBA4A	tubulin alpha 4a	TUBA4A	TUBA4A	TUBA4A	0.241	0.493	-0.053	0.845	-0.034	0.907	Cytoplasm	other		6-mercaptopurine/vincristine,bevacizumab/docetaxel,bevacizumab/docetaxel/prednisone/thalidomide/zoledronic acid,bevacizumab/paclitaxel,bevacizumab/paclitaxel/pemetrexed,bevacizumab/paclitaxel/topotecan,cabazitaxel,cabazitaxel/prednisolone,cabazitaxel/prednisone,capecitabine/docetaxel,capecitabine/docetaxel/gemcitabine,capecitabine/docetaxel/oxaliplatin/trastuzumab,cevipabulin,colchicine,colchicin…
TUBAL3	tubulin alpha like 3	TUBAL3	TUBAL3	TUBAL3	-0.025	0.827	0.258	0.394	-0.041	0.847	Other	enzyme
TUBB3	tubulin beta 3 class III	TUBB3	TUBB3	TUBB3	0.213	0.825	-0.246	0.697	0.79	0.174	Cytoplasm	other	response to therapy	6-mercaptopurine/vincristine,ABT-751,bevacizumab/docetaxel,bevacizumab/docetaxel/prednisone/thalidomide/zoledronic acid,bevacizumab/paclitaxel,bevacizumab/paclitaxel/pemetrexed,bevacizumab/paclitaxel/topotecan,BMS-275183,capecitabine/docetaxel,capecitabine/docetaxel/gemcitabine,capecitabine/docetaxel/oxaliplatin/trastuzumab,capecitabine/ixabepilone,cevipabulin,colchicine,colchicine/probenecid,cyc…
TUBB6	tubulin beta 6 class V	TUBB6	TUBB6	TUBB6	-0.124	0.539	0.008	0.974	0.141	0.551	Cytoplasm	other
TUBB	tubulin beta class I	TUBB	TUBB	TUBB	-0.047	0.71	0.119	0.477	0.076	0.359	Cytoplasm	other	efficacy	ixabepilone,ixabepilone/rifampin
TUBB2A	tubulin beta 2A class IIa	TUBB2A	TUBB2A	TUBB2A	0.1	0.751	0.055	0.902	-0.228	0.576	Cytoplasm	other		6-mercaptopurine/vincristine,ABT-751,batabulin,bevacizumab/docetaxel,bevacizumab/docetaxel/prednisone/thalidomide/zoledronic acid,bevacizumab/paclitaxel,bevacizumab/paclitaxel/pemetrexed,bevacizumab/paclitaxel/topotecan,BMS-275183,capecitabine/docetaxel,capecitabine/docetaxel/gemcitabine,capecitabine/docetaxel/oxaliplatin/trastuzumab,cevipabulin,colchicine,colchicine/probenecid,crolibulin,cycloph…
TUBB4A	tubulin beta 4A class IVa	TUBB4A	TUBB4A	TUBB4A	-0.077	0.887	-0.029	0.94	0.077	0.818	Cytoplasm	other		6-mercaptopurine/vincristine,ABT-751,bevacizumab/docetaxel,bevacizumab/docetaxel/prednisone/thalidomide/zoledronic acid,bevacizumab/paclitaxel,bevacizumab/paclitaxel/pemetrexed,bevacizumab/paclitaxel/topotecan,BMS-275183,capecitabine/docetaxel,capecitabine/docetaxel/gemcitabine,capecitabine/docetaxel/oxaliplatin/trastuzumab,cevipabulin,colchicine,colchicine/probenecid,cyclophosphamide/daunorubici…
TUBB4B	tubulin beta 4B class IVb	TUBB4B	TUBB4B	TUBB4B	-0.234	0.56	-0.06	0.761	0.106	0.313	Cytoplasm	other	unspecified application	6-mercaptopurine/vincristine,ABT-751,bevacizumab/docetaxel,bevacizumab/docetaxel/prednisone/thalidomide/zoledronic acid,bevacizumab/paclitaxel,bevacizumab/paclitaxel/pemetrexed,bevacizumab/paclitaxel/topotecan,BMS-275183,capecitabine/docetaxel,capecitabine/docetaxel/gemcitabine,capecitabine/docetaxel/oxaliplatin/trastuzumab,cevipabulin,colchicine,colchicine/probenecid,cyclophosphamide/daunorubici…
TUBG2	tubulin gamma 2	TUBG2	TUBG2	TUBG2	0.163	0.276	0.004	0.982	-0.128	0.498	Cytoplasm	other		6-mercaptopurine/vincristine,bevacizumab/docetaxel,bevacizumab/docetaxel/prednisone/thalidomide/zoledronic acid,bevacizumab/paclitaxel,bevacizumab/paclitaxel/pemetrexed,bevacizumab/paclitaxel/topotecan,capecitabine/docetaxel,capecitabine/docetaxel/gemcitabine,capecitabine/docetaxel/oxaliplatin/trastuzumab,cevipabulin,colchicine,colchicine/probenecid,cyclophosphamide/daunorubicin/imatinib/predniso…
TUFM	Tu translation elongation factor, mitochondrial	TUFM	TUFM	TUFM	-0.085	0.399	-0.011	0.945	-0.039	0.814	Cytoplasm	translation regulator
TUFT1	tuftelin 1	TUFT1	TUFT1	TUFT1	0.633		0.365		0.279		Cytoplasm	other
TWF1	twinfilin actin binding protein 1	TWF1	TWF1	TWF1	0.255	0.0822	0.675	0.215	0.248	0.37	Cytoplasm	kinase
TWF2	twinfilin actin binding protein 2	TWF2	TWF2	TWF2	-0.127	0.437	-0.009	0.945	-0.098	0.452	Cytoplasm	kinase
TXN	thioredoxin	TXN	TXN	TXN	-0.131	0.674	-0.287	0.489	-0.377	0.348	Cytoplasm	enzyme	efficacy,unspecified application	PX-12
TXNDC5	thioredoxin domain containing 5	TXNDC5	TXNDC5	TXNDC5	-0.107	0.702	-0.286	0.333	-0.33	0.478	Cytoplasm	enzyme
TXNDC12	thioredoxin domain containing 12	TXNDC12	TXNDC12	TXNDC12	-0.186	0.0704	-0.31	0.0586	-0.255	0.0917	Cytoplasm	enzyme
TXNDC17	thioredoxin domain containing 17	TXNDC17	TXNDC17	TXNDC17	-0.055	0.793	-0.045	0.837	-0.088	0.729	Cytoplasm	enzyme
TXNL1	thioredoxin like 1	TXNL1	TXNL1	TXNL1	0.016	0.894	0.103	0.425	0.018	0.853	Cytoplasm	enzyme
TYMP	thymidine phosphorylase	TYMP	TYMP	TYMP	-0.449	0.383	-0.468	0.406	-0.406	0.571	Extracellular Space	growth factor	diagnosis,efficacy,prognosis,response to therapy	tipiracil
U2AF2	U2 small nuclear RNA auxiliary factor 2	U2AF2	U2AF2	U2AF2	0.012	0.932	-0.034	0.756	0.185	0.534	Nucleus	other
UBA1	ubiquitin like modifier activating enzyme 1	UBA1	UBA1	UBA1	-0.043	0.107	0.047	0.414	0.002	0.955	Cytoplasm	enzyme		MLN7243
UBA2	ubiquitin like modifier activating enzyme 2	UBA2	UBA2	UBA2	0.019	0.848	0.213	0.178	0.275	0.127	Cytoplasm	enzyme	unspecified application
UBA3	ubiquitin like modifier activating enzyme 3	UBA3	UBA3	UBA3	0.322		-0.155		0.271		Cytoplasm	enzyme
UBA6	ubiquitin like modifier activating enzyme 6	UBA6	UBA6	UBA6	-0.005	0.988	0.237	0.341	-0.049	0.851	Cytoplasm	enzyme
UBAP2L	ubiquitin associated protein 2 like	UBAP2L	UBAP2L	UBAP2L	0.155	0.421	0.286	0.256	0.059	0.75	Nucleus	other
UBE2I	ubiquitin conjugating enzyme E2 I	UBE2I	UBE2I	UBE2I	-0.088	0.475	0.09	0.63	0.018	0.915	Nucleus	enzyme	disease progression
UBE2K	ubiquitin conjugating enzyme E2 K	UBE2K	UBE2K	UBE2K	0.067	0.0236	0.505	0.475	0.083	0.899	Cytoplasm	transcription regulator
UBE2L3	ubiquitin conjugating enzyme E2 L3	UBE2L3	UBE2L3	UBE2L3	-0.048	0.71	0.025	0.678	0.165	0.133	Nucleus	enzyme
UBE2M	ubiquitin conjugating enzyme E2 M	UBE2M	UBE2M	UBE2M	-0.121	0.247	-0.191	0.452	-0.289	0.349	Cytoplasm	enzyme
UBE2N	ubiquitin conjugating enzyme E2 N	UBE2N	UBE2N	UBE2N	-0.091	0.165	-0.013	0.771	-0.029	0.696	Cytoplasm	enzyme
UBE2V1	ubiquitin conjugating enzyme E2 V1	UBE2V1	UBE2V1	UBE2V1	-0.054	0.638	-0.129	0.501	-0.044	0.829	Nucleus	transcription regulator
UBQLN1	ubiquilin 1	UBQLN1	UBQLN1	UBQLN1	-0.175		-1.134		-0.189		Cytoplasm	other	unspecified application
UBR4	ubiquitin protein ligase E3 component n-recognin 4	UBR4	UBR4	UBR4	0.073	0.907	0.976	0.153	0.33	0.362	Nucleus	enzyme
UBTF	upstream binding transcription factor	UBTF	UBTF	UBTF	-0.117	0.626	-0.322	0.446	-0.144	0.588	Nucleus	transcription regulator
UBXN6	UBX domain protein 6	UBXN6	UBXN6	UBXN6	0.025	0.891	0.215	0.547	-0.555	0.128	Cytoplasm	other
UCHL1	ubiquitin C-terminal hydrolase L1	UCHL1	UCHL1	UCHL1	0.099	0.416	0.1	0.685	0.025	0.885	Cytoplasm	peptidase	diagnosis,prognosis
UFC1	ubiquitin-fold modifier conjugating enzyme 1	UFC1	UFC1	UFC1	-0.279	0.366	-0.155	0.6	-0.21	0.522	Cytoplasm	enzyme
UFL1	UFM1 specific ligase 1	UFL1	UFL1	UFL1	0.015	0.944	0.183	0.582	-0.09	0.724	Cytoplasm	enzyme
UFM1	ubiquitin fold modifier 1	UFM1	UFM1	UFM1	0.097	0.818	0.051	0.925	0.329	0.525	Cytoplasm	other
UGDH	UDP-glucose 6-dehydrogenase	UGDH	UGDH	UGDH	-0.026	0.842	-0.023	0.556	-0.164	0.454	Nucleus	enzyme	diagnosis
UGGT1	UDP-glucose glycoprotein glucosyltransferase 1	UGGT1	UGGT1	UGGT1	-0.086	0.568	-0.071	0.682	-0.106	0.368	Cytoplasm	enzyme
UGP2	UDP-glucose pyrophosphorylase 2	UGP2	UGP2	UGP2	-0.073	0.552	0.258	0.362	-0.013	0.913	Cytoplasm	enzyme
UMPS	uridine monophosphate synthetase	UMPS	UMPS	UMPS	-0.309	0.142	0.176	0.721	-0.021	0.895	Cytoplasm	enzyme		bevacizumab/gimeracil/irinotecan/oxonic acid/tegafur,cetuximab/gimeracil/irinotecan/oxonic acid/tegafur,gimeracil/irinotecan/oxonic acid/tegafur,gimeracil/oxonic acid/tegafur,oxonic acid,pyrazofurin
UNC45A	unc-45 myosin chaperone A	UNC45A	UNC45A	UNC45A	0.184	0.462	0.131	0.75	0.073	0.851	Plasma Membrane	other
UPF1	UPF1 RNA helicase and ATPase	UPF1	UPF1	UPF1	0.431	0.0925	0.238	0.0929	0.275	0.115	Nucleus	enzyme
UPF3B	UPF3B regulator of nonsense mediated mRNA decay	UPF3B	UPF3B	UPF3B	0.047	0.822	0.336	0.015	0.16	0.197	Nucleus	transporter
UQCRB	ubiquinol-cytochrome c reductase binding protein	UQCRB	UQCRB	UQCRB	0.003	0.98	-0.065	0.657	0.062	0.707	Cytoplasm	enzyme
UQCRC1	ubiquinol-cytochrome c reductase core protein 1	UQCRC1	UQCRC1	UQCRC1	-0.044	0.6	0.037	0.679	-0.013	0.889	Cytoplasm	enzyme
UQCRC2	ubiquinol-cytochrome c reductase core protein 2	UQCRC2	UQCRC2	UQCRC2	-0.125	0.119	-0.141	0.476	-0.109	0.418	Cytoplasm	enzyme
UQCRFS1	ubiquinol-cytochrome c reductase, Rieske iron-sulfur polypeptide 1	UQCRFS1	UQCRFS1	UQCRFS1	-0.048	0.595	0.171	0.339	0.099	0.499	Cytoplasm	enzyme
UQCRH	ubiquinol-cytochrome c reductase hinge protein	UQCRH	UQCRH	UQCRH	0.138	0.45	0.138	0.674	0.031	0.885	Cytoplasm	enzyme
USO1	USO1 vesicle transport factor	USO1	USO1	USO1	0.027	0.881	0.053	0.727	-0.035	0.842	Cytoplasm	other
USP5	ubiquitin specific peptidase 5	USP5	USP5	USP5	0.03	0.776	0.015	0.882	0.005	0.962	Cytoplasm	peptidase
USP7	ubiquitin specific peptidase 7	USP7	USP7	USP7	0.046	0.713	0.045	0.518	-0.055	0.565	Nucleus	peptidase
USP14	ubiquitin specific peptidase 14	USP14	USP14	USP14	0.076	0.523	-0.012	0.906	-0.039	0.704	Cytoplasm	peptidase		VLX1570
USP9X	ubiquitin specific peptidase 9 X-linked	USP9X	USP9X	USP9X	0.061		0.584		-0.024		Plasma Membrane	peptidase	diagnosis
[truncated: 54 more rows]
